# Supplementary material
Source: PubMed Central journal article supplement (PMC6059566)
Supplement: NIHMS981929-supplement-Supp_Info.pdf [file NIHMS981929-supplement-Supp_Info.pdf]

## SUPPORTING INFORMATION

### **Sodium Diisopropylamide in Tetrahydrofuran: Selectivities, Rates, and Mechanisms of Alkene and Diene Isomerizations and Metalations**

Russell F. Algera, Yun Ma, and David B. Collum\*

Department of Chemistry and Chemical Biology  
Baker Laboratory, Cornell University  
Ithaca, New York 14853–1301  
E-mail: dbc6@cornell.edu

#### **I. Rate studies**

- |                     |                                                                                                       |      |
|---------------------|-------------------------------------------------------------------------------------------------------|------|
| <b>Figure S-1.</b>  | <sup>1</sup> H NMR spectra showing pentene concentration versus time for NaDA-mediated isomerization. | S-5  |
| <b>Figure S-2.</b>  | Plot of pentene concentration versus time.                                                            | S-6  |
| <b>Figure S-3.</b>  | Plot of initial rate versus THF concentration for the isomerization 1-pentene.                        | S-6  |
| <b>Figure S-4.</b>  | Plot of initial rate versus NaDA concentration for the isomerization of 0.76 M 1-pentene.             | S-7  |
| <b>Figure S-5.</b>  | Plot of initial rate versus concentration of 1,4-cyclohexadiene (metalation).                         | S-8  |
| <b>Figure S-6.</b>  | Plot of initial rate versus concentration of THF for metalation of 1,4-cyclohexadiene.                | S-9  |
| <b>Figure S-7.</b>  | Plot of initial rate versus concentration of NaDA for metalation of 1,4-cyclohexadiene.               | S-10 |
| <b>Figure S-8.</b>  | Plot of $k_{\text{obsd}}$ versus concentration of THF for metalation of 1,4-pentadiene.               | S-11 |
| <b>Figure S-9.</b>  | Plot of initial rate versus concentration of NaDA for metalation of 1,4-pentadiene.                   | S-12 |
| <b>Figure S-10.</b> | Plot of initial rate versus concentration of allyl methyl ether (isomerization).                      | S-13 |
| <b>Figure S-11.</b> | Plot of initial rate versus concentration of THF for isomerization of allyl methyl ether.             | S-14 |

|                     |                                                                                                                                      |      |
|---------------------|--------------------------------------------------------------------------------------------------------------------------------------|------|
| <b>Figure S-12.</b> | Plot of initial rate versus concentration of NaDA for isomerization of allyl methyl ether.                                           | S-15 |
| <b>Figure S-13.</b> | Plot of $k_{\text{obsd}}$ versus THF concentration for isomerization of allyloxytrimethylsilane.                                     | S-16 |
| <b>Figure S-14.</b> | Plot of $k_{\text{obsd}}$ versus NaDA concentration for isomerization of allyloxytrimethylsilane.                                    | S-17 |
| <b>Figure S-15.</b> | $^1\text{H}$ NMR spectra showing isomerization of allyloxy- <i>tert</i> -butyldimethylsilane.                                        | S-18 |
| <b>Figure S-16.</b> | Plot of $k_{\text{obsd}}$ versus THF concentration for isomerization of allyloxy- <i>tert</i> -butyldimethylsilane.                  | S-19 |
| <b>Figure S-17.</b> | Plot of initial rate versus NaDA concentration for isomerization of allyloxy- <i>tert</i> -butyldimethylsilane.                      | S-20 |
| <b>Figure S-18.</b> | Plot of $k_{\text{obsd}}$ versus THF concentration for isomerization of allyloxytriisopropylsilane.                                  | S-21 |
| <b>Figure S-19.</b> | Plot of $k_{\text{obsd}}$ versus NaDA concentration for isomerization of allyloxytriisopropylsilane.                                 | S-22 |
| <b>Figure S-20.</b> | $^1\text{H}$ NMR spectrum ( $\text{CDCl}_3$ ) of myrcene.                                                                            | S-23 |
| <b>Figure S-21.</b> | Concentration trace showing loss of geraniol TMS ether <b>6</b> with NaDA in neat THF at $-78$ °C.                                   | S-23 |
| <b>Figure S-22.</b> | $^1\text{H}$ NMR spectra of trimethylsilyl ether of crotyl alcohol with NaDA in neat THF at $-60$ °C.                                | S-24 |
| <b>Figure S-23.</b> | Plot of trimethylsilyl ether of crotyl alcohol concentration versus time with NaDA in neat THF at $-60$ °C.                          | S-24 |
| <b>Figure S-24.</b> | $^1\text{H}$ NMR spectra of trimethylsilyl ether of prenil with NaDA in neat THF at $-60$ °C.                                        | S-25 |
| <b>Figure S-25.</b> | Plot of trimethylsilyl ether of prenil concentration versus time with NaDA in neat THF at $-60$ °C.                                  | S-25 |
| <b>Figure S-26.</b> | $^1\text{H}$ NMR spectra of trimethylsilyl ether <b>8</b> with NaDA in neat THF at $-40$ °C.                                         | S-26 |
| <b>Figure S-27.</b> | $^1\text{H}$ NMR spectrum of isomerization of neat allyloxytrimethylsilane with 7 mol % NaDA                                         | S-27 |
| <b>Figure S-28.</b> | $^1\text{H}$ NMR spectrum ( $\text{CDCl}_3$ ) of isolated material (distillation) from isomerization of neat allyloxytrimethylsilane | S-28 |

**Figure S-29.**  $^1\text{H}$  NMR spectrum representing partial isomerization of allyloxy-*tert*-butyldimethylsilane with NaDA and  $\text{DNi-Pr}_2$  in  $\text{THF-}d_8$ . S-29

---

## II. Computations

|                    |                                                                                                                                                           |      |
|--------------------|-----------------------------------------------------------------------------------------------------------------------------------------------------------|------|
| <b>Table S-1.</b>  | Geometric coordinates and thermally corrected MP2 energies for 1-pentene.                                                                                 | S-30 |
| <b>Table S-2.</b>  | Geometric coordinates and thermally corrected MP2 energies for $[\text{A}(\text{THF})_2(1\text{-pentene})]^\ddagger$ .                                    | S-31 |
| <b>Table S-3.</b>  | Geometric coordinates and thermally corrected MP2 energies for pro- <i>Z</i> $[\text{A}(\text{THF})_3(1\text{-pentene})]^\ddagger$ .                      | S-33 |
| <b>Table S-4.</b>  | Geometric coordinates and thermally corrected MP2 energies for pro- <i>E</i> $[\text{A}(\text{THF})_3(1\text{-pentene})]^\ddagger$ .                      | S-35 |
| <b>Table S-5.</b>  | Geometric coordinates and thermally corrected MP2 energies for 1,4-pentadiene.                                                                            | S-37 |
| <b>Table S-6.</b>  | Geometric coordinates and thermally corrected MP2 energies for $[\text{A}(\text{THF})_3 \cdot (1,4\text{-pentadiene})]^\ddagger$ .                        | S-38 |
| <b>Table S-7.</b>  | Geometric coordinates and thermally corrected MP2 energies for 1,4-cyclohexadiene.                                                                        | S-40 |
| <b>Table S-8.</b>  | Geometric coordinates and thermally corrected MP2 energies for $[\text{A}(\text{THF})_3 \cdot (1,4\text{-cyclohexadiene})]^\ddagger$ .                    | S-41 |
| <b>Table S-9.</b>  | Geometric coordinates and thermally corrected MP2 energies for allyl methyl ether.                                                                        | S-43 |
| <b>Table S-10.</b> | Geometric coordinates and thermally corrected MP2 energies for pro- <i>Z</i> $[\text{A}(\text{THF})_3 \cdot (\text{allyl methyl ether})]^\ddagger$ .      | S-44 |
| <b>Table S-11.</b> | Geometric coordinates and thermally corrected MP2 energies for pro- <i>E</i> $[\text{A}(\text{THF})_3 \cdot (\text{allyl methyl ether})]^\ddagger$ .      | S-46 |
| <b>Table S-12.</b> | Geometric coordinates and thermally corrected MP2 energies for allyloxytrimethylsilane.                                                                   | S-48 |
| <b>Table S-13.</b> | Geometric coordinates and thermally corrected MP2 energies for pro- <i>Z</i> $[\text{A}(\text{THF})_3 \cdot (\text{allyloxytrimethylsilane})]^\ddagger$ . | S-49 |
| <b>Table S-14.</b> | Geometric coordinates and thermally corrected MP2 energies for pro- <i>E</i> $[\text{A}(\text{THF})_3 \cdot (\text{allyloxytrimethylsilane})]^\ddagger$ . | S-51 |

|                    |                                                                                                                                                                                                                       |      |
|--------------------|-----------------------------------------------------------------------------------------------------------------------------------------------------------------------------------------------------------------------|------|
| <b>Table S-15.</b> | Geometric coordinates and thermally corrected MP2 energies for allyloxy- <i>tert</i> -butyldimethylsilane.                                                                                                            | S-53 |
| <b>Table S-16.</b> | Geometric coordinates and thermally corrected MP2 energies for pro- <i>Z</i> [A(THF) <sub>2</sub> ·(allyloxy- <i>tert</i> -butyldimethylsilane)] <sup>‡</sup> .                                                       | S-54 |
| <b>Table S-17.</b> | Geometric coordinates and thermally corrected MP2 energies for IRC of pro- <i>Z</i> [A(THF) <sub>2</sub> ·(allyloxy- <i>tert</i> -butyldimethylsilane)] <sup>‡</sup> .                                                | S-56 |
| <b>Table S-18.</b> | Geometric coordinates and thermally corrected MP2 energies for pro- <i>E</i> [A(THF) <sub>2</sub> ·(allyloxy- <i>tert</i> -butyldimethylsilane)] <sup>‡</sup> .                                                       | S-58 |
| <b>Table S-19.</b> | Geometric coordinates and thermally corrected MP2 energies for pro- <i>Z</i> [A(THF) <sub>3</sub> ·(allyloxy- <i>tert</i> -butyldimethylsilane)] <sup>‡</sup> .                                                       | S-60 |
| <b>Table S-20.</b> | Geometric coordinates and thermally corrected MP2 energies for pro- <i>E</i> [A(THF) <sub>3</sub> ·(allyloxy- <i>tert</i> -butyldimethylsilane)] <sup>‡</sup> .                                                       | S-62 |
| <b>Table S-21.</b> | Geometric coordinates and thermally corrected MP2 energies for allyloxytriisopropylsilane.                                                                                                                            | S-64 |
| <b>Table S-22.</b> | Geometric coordinates and thermally corrected MP2 energies for pro- <i>Z</i> μ-allyl [A(THF) <sub>3</sub> ·(allyloxytriisopropylsilane)] <sup>‡</sup> .                                                               | S-65 |
| <b>Table S-23.</b> | Geometric coordinates and thermally corrected MP2 energies for pro- <i>E</i> μ-allyl [A(THF) <sub>3</sub> ·(allyloxytriisopropylsilane)] <sup>‡</sup> .                                                               | S-67 |
| <b>Table S-24.</b> | Geometric coordinates and thermally corrected MP2 energies for pro- <i>Z</i> κ-O [A(THF) <sub>2</sub> ·(allyloxytriisopropylsilane)] <sup>‡</sup> .                                                                   | S-69 |
| <b>Table S-25.</b> | Geometric coordinates and thermally corrected MP2 energies for pro- <i>E</i> κ-O [A(THF) <sub>2</sub> ·(allyloxytriisopropylsilane)] <sup>‡</sup> .                                                                   | S-71 |
| <b>Table S-26.</b> | Geometric coordinates and thermally corrected MP2 energies for pro- <i>E</i> κ-O [A(THF) <sub>3</sub> ·(allyloxytriisopropylsilane)] <sup>‡</sup> . The pro- <i>Z</i> isomer does not converge without THF extrusion. | S-73 |

---

**IV. Full reference (Gaussian)**

S-75

---

## I. Rate Studies

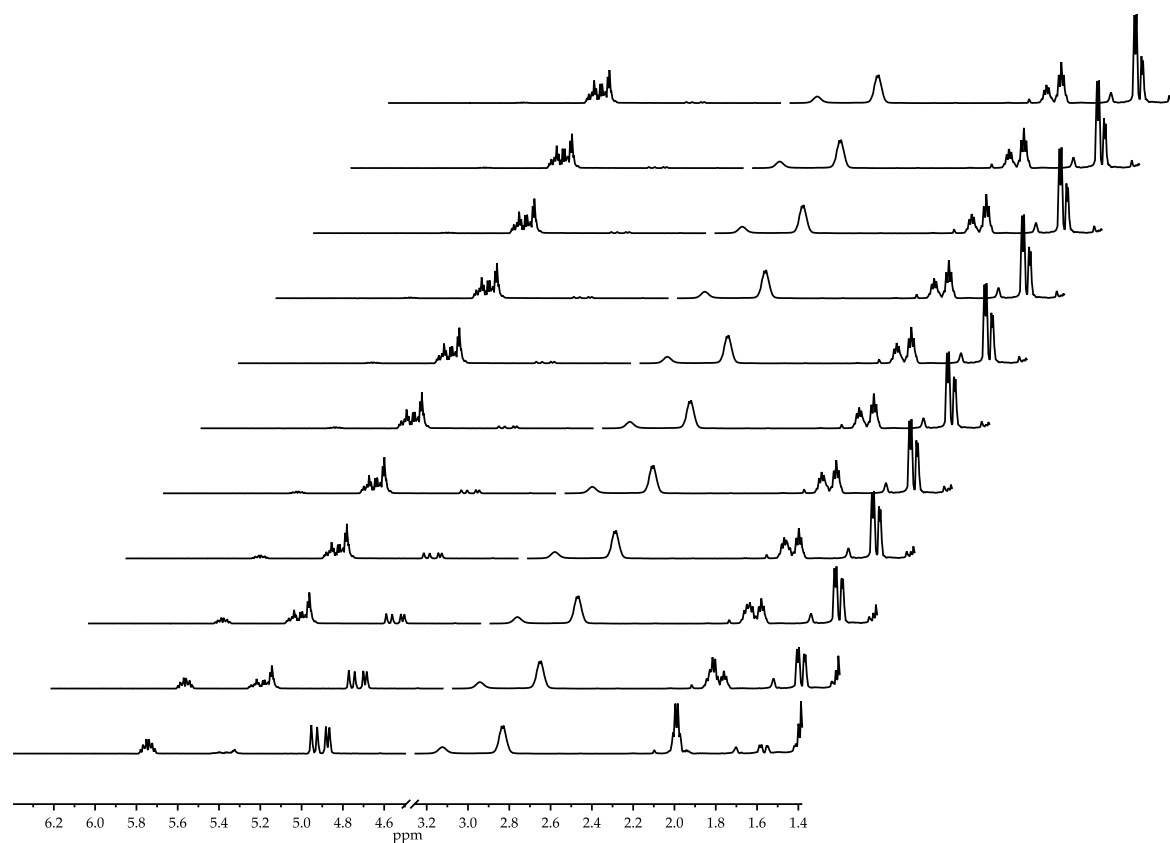

**Figure S-1.** Representative plot of pentene concentration versus time ( $^1\text{H}$  NMR) for the isomerization of 0.76 M 1-pentene with 0.18 M NaDA and 0.59 M diisopropylamine in 8.83 M THF/hexane at 25 °C. Each interval represents 300 seconds.

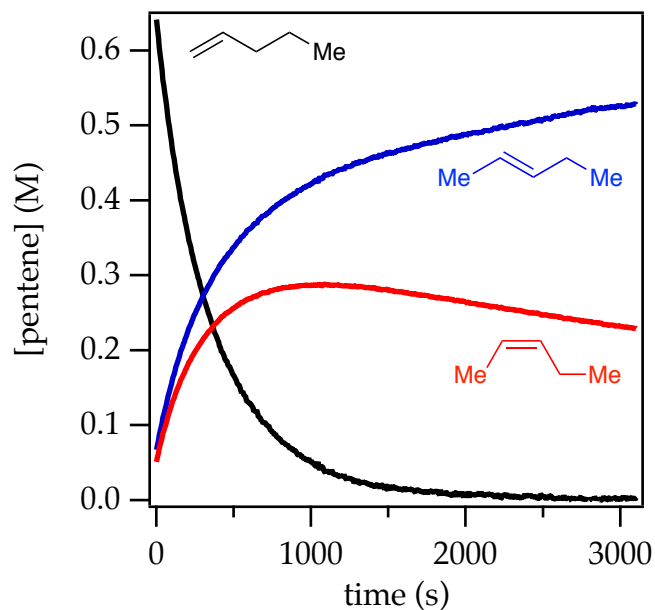

**Figure S-2.** Plot of alkene concentration versus time ( $^1\text{H}$  NMR) for the isomerization of 0.76 M 1-pentene with 0.18 M NaDA and 0.59 M diisopropylamine in 8.83 M THF/hexane at 25 °C. The black trace represents 1-pentene, the blue trace represents *trans*-2-pentene, and the red trace represents *cis*-2-pentene.

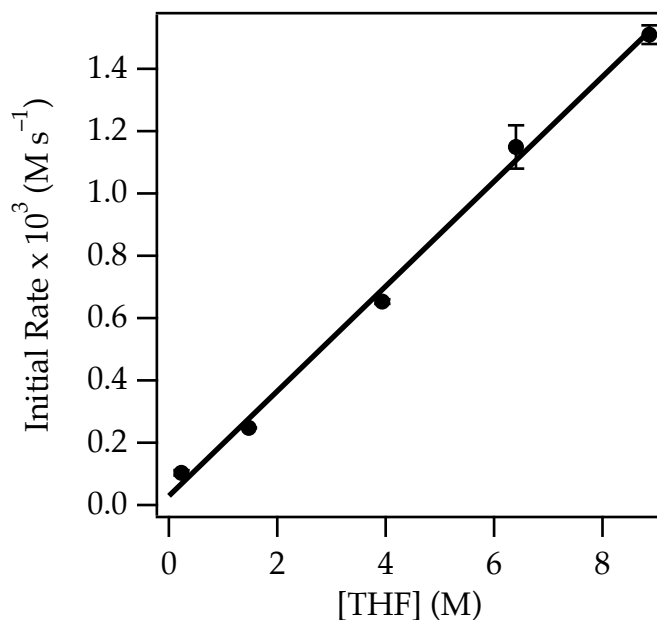

**Figure S-3.** Plot of initial rate versus THF concentration for the isomerization of 0.76 M 1-pentene (Equation 1) with 0.18 M NaDA and 0.59 M diisopropylamine in hexane cosolvent at 25 °C. The curve depicts an unweighted least-squares fit to the function  $f(x) = ax + b$ :  $a = 0.168 \pm 0.006$ ;  $b = 0.03 \pm 0.03$ .

| [THF] (M) | Initial Rate $\times 10^3$ (M s <sup>-1</sup> ) | Standard deviation $\times 10^3$ (M s <sup>-1</sup> ) |
|-----------|-------------------------------------------------|-------------------------------------------------------|
| 0.23      | 0.104                                           | 0.008                                                 |
| 1.47      | 0.248                                           | 0.0007                                                |
| 3.93      | 0.653                                           | 0.007                                                 |
| 6.40      | 1.15                                            | 0.07                                                  |
| 8.86      | 1.51                                            | 0.03                                                  |

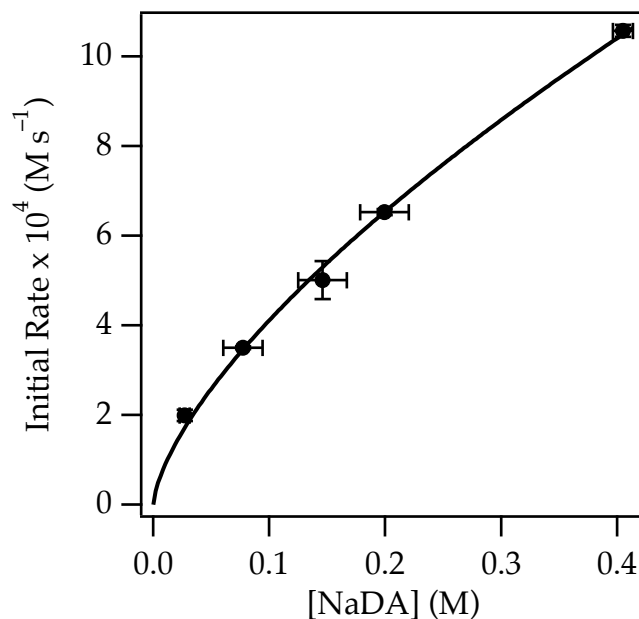

**Figure S-4.** Plot of initial rate versus NaDA concentration for the isomerization of 0.76 M 1-pentene (Equation 1) with 0.59 M diisopropylamine in 3.93 M THF/hexane at 25 °C. The curve depicts an unweighted least-squares fit to the function  $f(x) = ax^b$ :  $a = 19.2 \pm 0.8$ ;  $b = 0.67 \pm 0.03$ . The covariance represents measured titer of NaDA.

| [NaDA] (M) | Initial Rate $\times 10^4$ (M s <sup>-1</sup> ) | Standard deviation $\times 10^4$ (M s <sup>-1</sup> ) |
|------------|-------------------------------------------------|-------------------------------------------------------|
| 0.027      | 2.0                                             | 0.1                                                   |
| 0.080      | 3.50                                            | 0.03                                                  |
| 0.15       | 5.0                                             | 0.4                                                   |
| 0.20       | 6.53                                            | 0.07                                                  |
| 0.405      | 10.6                                            | 0.1                                                   |

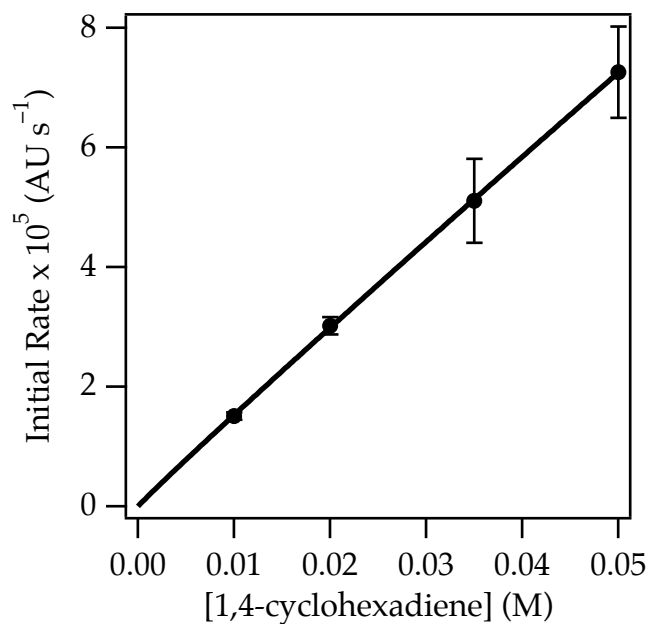

**Figure S-5.** Plot of initial rate versus concentration of 1,4-cyclohexadiene following product growth at  $1558\text{ cm}^{-1}$  with 0.10 M NaDA in 6.04 M THF/DMEA at  $-95\text{ }^{\circ}\text{C}$ . The curve depicts an unweighted least-squares fit to the function  $f(x) = ax^b$ :  $a = 132 \pm 4$ ;  $b = 0.968 \pm 0.009$ .

| [alkene] (M) | Initial Rate $\times 10^5$ (AU s $^{-1}$ ) | Standard deviation $\times 10^5$ (AU s $^{-1}$ ) |
|--------------|--------------------------------------------|--------------------------------------------------|
| 0.010        | 1.51                                       | 0.06                                             |
| 0.020        | 3.0                                        | 0.1                                              |
| 0.035        | 5.1                                        | 0.7                                              |
| 0.050        | 7.3                                        | 0.8                                              |



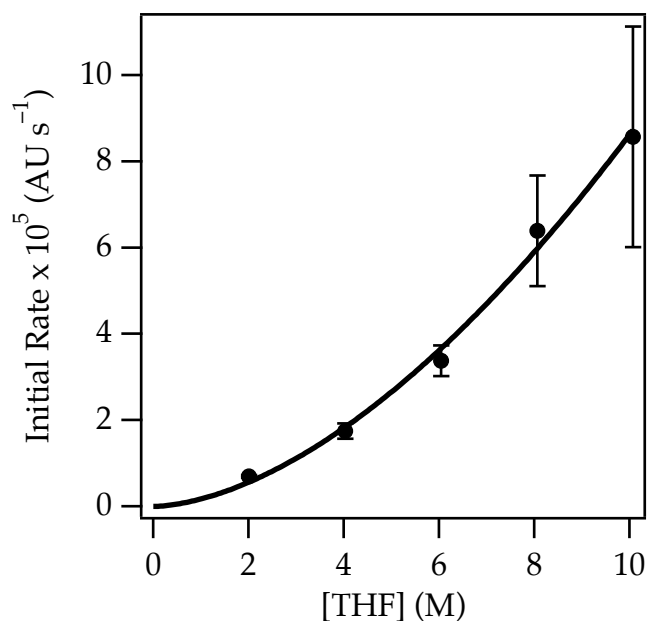

**Figure S-6.** Plot of initial rate versus concentration of THF following product growth at  $1558\text{ cm}^{-1}$  with  $0.10\text{ M}$  NaDA and  $0.020\text{ M}$  1,4-cyclohexadiene in DMEA cosolvent at  $-95\text{ }^\circ\text{C}$ . The curve depicts an unweighted least-squares fit to the function  $f(x) = ax^b$ :  $a = 0.17 \pm 0.05$ ;  $b = 1.7 \pm 0.1$ .

| [THF] (M) | Initial Rate $\times 10^5$ (AU s $^{-1}$ ) | Standard deviation $\times 10^5$ (AU s $^{-1}$ ) |
|-----------|--------------------------------------------|--------------------------------------------------|
| 2.01      | 0.696                                      | 0.03                                             |
| 4.03      | 1.75                                       | 0.2                                              |
| 6.04      | 3.38                                       | 0.4                                              |
| 8.06      | 6.39                                       | 1                                                |
| 10.1      | 8.57                                       | 3                                                |

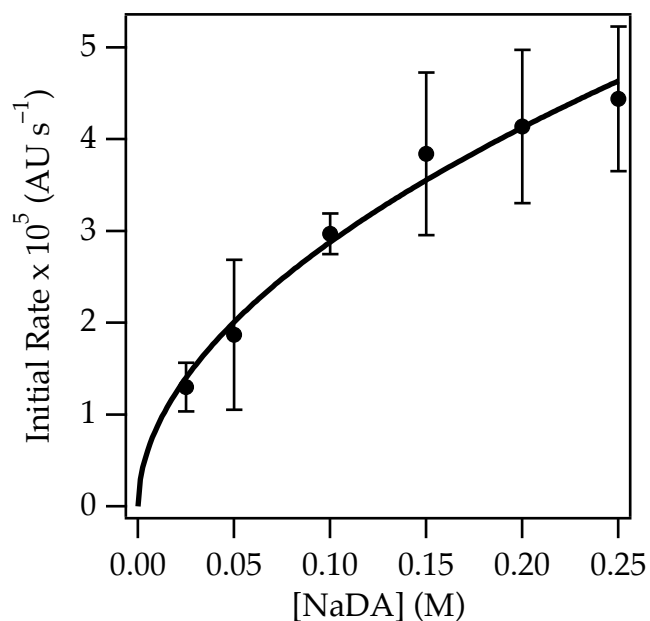

**Figure S-7.** Plot of initial rate versus concentration of NaDA following product growth at  $1558\text{ cm}^{-1}$  with  $0.020\text{ M}$  1,4-cyclohexadiene in  $6.04\text{ M}$  THF/DMEA at  $-95\text{ }^{\circ}\text{C}$ . The curve depicts an unweighted least-squares fit to the function  $f(x) = ax^b$ :  $a = 9.53 \pm 0.8$ ;  $b = 0.52 \pm 0.05$ .

| [NaDA] (M) | Initial Rate $\times 10^5$ ( $\text{M s}^{-1}$ ) | Standard deviation $\times 10^5$ ( $\text{M s}^{-1}$ ) |
|------------|--------------------------------------------------|--------------------------------------------------------|
| 0.025      | 1.3                                              | 0.3                                                    |
| 0.05       | 1.87                                             | 0.8                                                    |
| 0.10       | 2.97                                             | 0.2                                                    |
| 0.15       | 3.84                                             | 0.9                                                    |
| 0.20       | 4.14                                             | 0.8                                                    |
| 0.25       | 4.44                                             | 0.8                                                    |

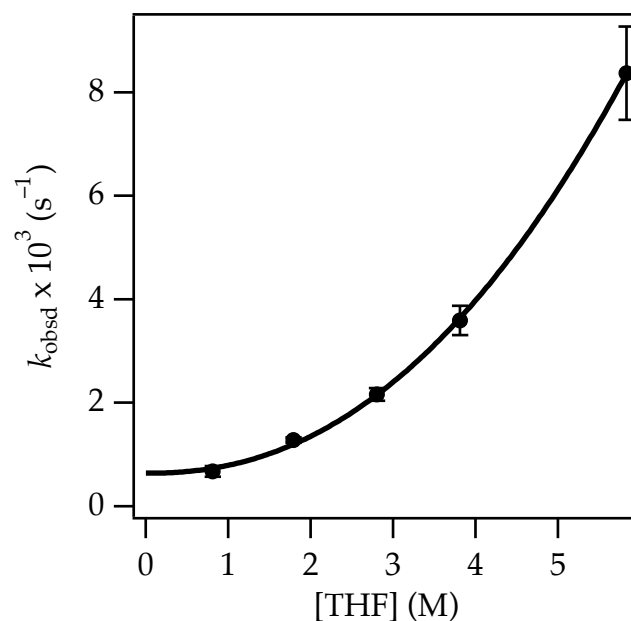

**Figure S-8.** Plot of  $k_{\text{obsd}}$  versus concentration of THF following product growth with 0.10 M NaDA and 0.020 M 1,4-pentadiene at  $-116\text{ }^{\circ}\text{C}$ . The curve depicts an unweighted least-squares fit to the function  $f(x) = ax^b + c$ :  $a = 0.15 \pm 0.02$ ;  $b = 2.23 \pm 0.07$ ;  $c = 0.64 \pm 0.08$ . The THF order depicted here is consistent with and supportive of the elevated THF order observed in the metalation of 1,4-cyclohexadiene.

| [THF] (M) | $k_{\text{obsd}} \times 10^3 \text{ (s}^{-1}\text{)}$ | Standard deviation $\times 10^3 \text{ (s}^{-1}\text{)}$ |
|-----------|-------------------------------------------------------|----------------------------------------------------------|
| 0.81      | 0.7                                                   | 0.1                                                      |
| 1.79      | 1.28                                                  | 0.05                                                     |
| 2.80      | 2.2                                                   | 0.1                                                      |
| 3.81      | 3.6                                                   | 0.3                                                      |
| 5.83      | 8.4                                                   | 0.9                                                      |

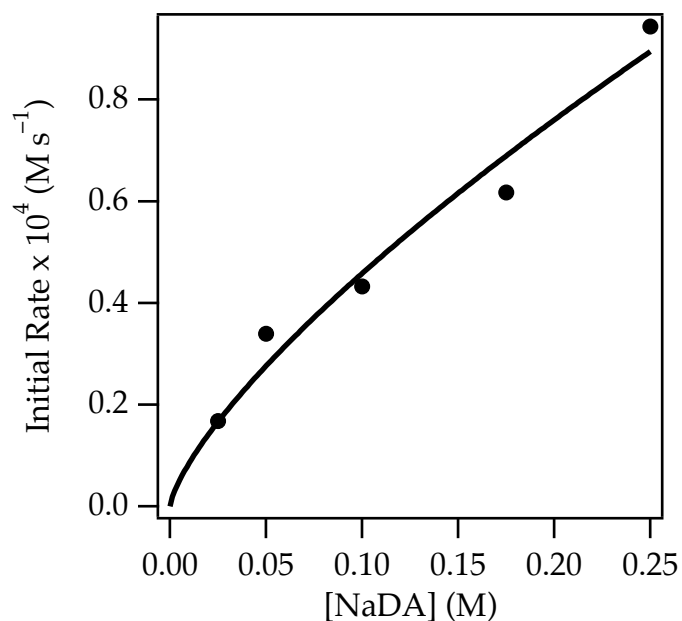

**Figure S-9.** Plot of initial rate versus concentration of NaDA following product growth with 0.020 M 1,4-pentadiene in 2.80 M THF/DMEA at  $-116\text{ }^{\circ}\text{C}$ . The curve depicts an unweighted least-squares fit to the function  $f(x) = ax^b$ :  $a = 2.5 \pm 0.5$ ;  $b = 0.7 \pm 0.1$ .

| [NaDA] (M) | Initial Rate $\times 10^4$ ( $\text{s}^{-1}$ ) |
|------------|------------------------------------------------|
| 0.025      | 0.167                                          |
| 0.05       | 0.339                                          |
| 0.1        | 0.433                                          |
| 0.175      | 0.617                                          |
| 0.25       | 0.944                                          |

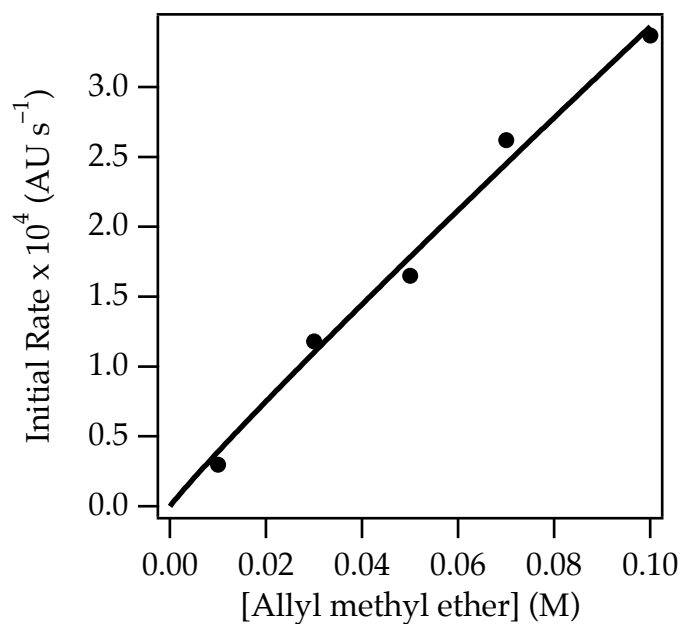

**Figure S-10.** Plot of initial rate versus concentration of allyl methyl ether following product growth at  $1674\text{ cm}^{-1}$  (methyl enol ether) with 0.10 M NaDA in 5.5 M THF/DMEA at  $-116\text{ }^{\circ}\text{C}$ . The curve depicts an unweighted least-squares fit to the function  $f(x) = ax$ :  $a = 35 \pm 1$ .

| [allyl methyl ether] (M) | Initial Rate $\times 10^4$ (AU s $^{-1}$ ) |
|--------------------------|--------------------------------------------|
| 0.010                    | 0.299                                      |
| 0.030                    | 1.18                                       |
| 0.050                    | 1.65                                       |
| 0.070                    | 2.62                                       |
| 0.10                     | 3.37                                       |

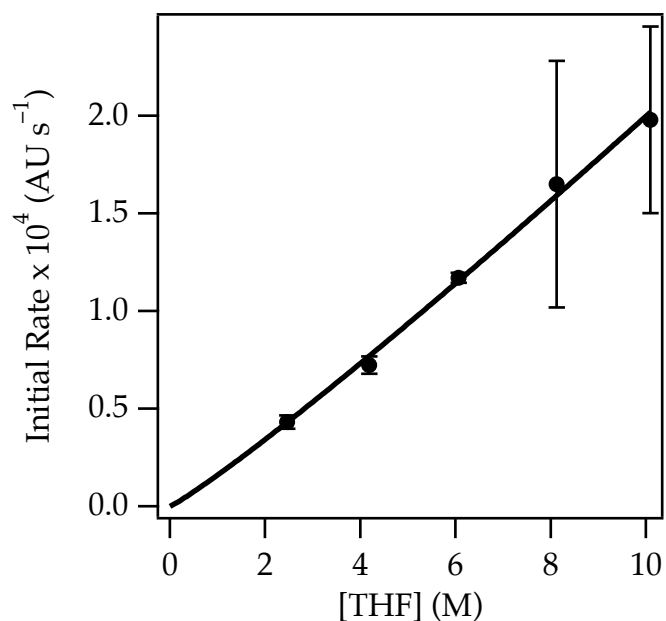

**Figure S-11.** Plot of initial rate versus concentration of THF following product growth at  $1674\text{ cm}^{-1}$  (methyl enol ether) with 0.10 M NaDA and 0.030 M allyl methyl ether at  $-116\text{ }^{\circ}\text{C}$ . The curve depicts an unweighted least-squares fit to the function  $f(x) = ax^b$ :  $a = 0.16 \pm 0.02$ ;  $b = 1.10 \pm 0.05$ .

| [THF] (M) | Initial Rate $\times 10^4$ (AU s $^{-1}$ ) | Standard deviation $\times 10^4$ (AU s $^{-1}$ ) |
|-----------|--------------------------------------------|--------------------------------------------------|
| 2.46      | 0.43                                       | 0.03                                             |
| 4.18      | 0.72                                       | 0.04                                             |
| 6.06      | 1.17                                       | 0.03                                             |
| 8.12      | 1.7                                        | 0.6                                              |
| 10.1      | 2.0                                        | 0.5                                              |

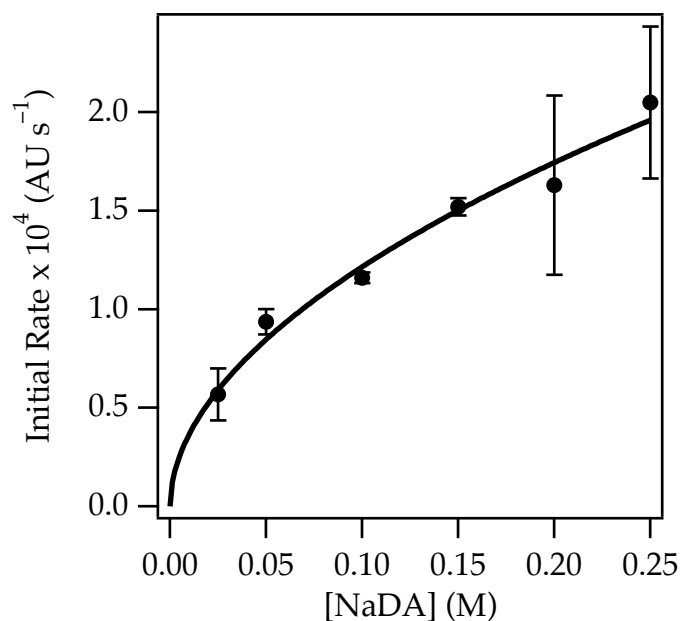

**Figure S-12.** Plot of initial rate versus concentration of NaDA following product growth at  $1674\text{ cm}^{-1}$  (methyl enol ether) with 0.030 M allyl methyl ether in 5.5 M THF/DMEA at  $-116\text{ }^{\circ}\text{C}$ . The curve depicts an unweighted least-squares fit to the function  $f(x) = ax^b$ :  $a = 4.0 \pm 0.3$ ;  $b = 0.52 \pm 0.05$ .

| [NaDA] (M) | Initial Rate $\times 10^4$ (AU s $^{-1}$ ) | Standard deviation $\times 10^4$ (AU s $^{-1}$ ) |
|------------|--------------------------------------------|--------------------------------------------------|
| 0.025      | 0.6                                        | 0.1                                              |
| 0.05       | 0.94                                       | 0.06                                             |
| 0.10       | 1.16                                       | 0.03                                             |
| 0.15       | 1.52                                       | 0.04                                             |
| 0.20       | 1.6                                        | 0.5                                              |
| 0.25       | 2.1                                        | 0.4                                              |

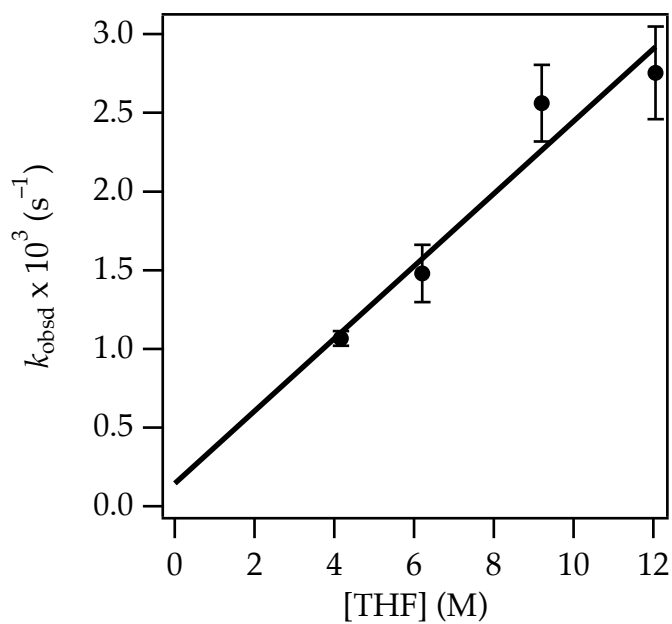

**Figure S-13.** Plot of  $k_{\text{obsd}}$  versus THF concentration following product growth at  $1601\text{ cm}^{-1}$  (trimethylsilyl enol ether) with  $0.010\text{ M}$  allyloxytrimethylsilane in hexane cosolvent at  $-78\text{ }^{\circ}\text{C}$ . The curve depicts an unweighted least-squares fit to the function  $f(x) = ax + b$ :  $a = 0.23 \pm 0.04$ ;  $b = 0.14 \pm 0.4$ .

| [THF] (M) | $k_{\text{obsd}} \times 10^3\text{ (s}^{-1}\text{)}$ | Standard deviation $\times 10^3\text{ (s}^{-1}\text{)}$ |
|-----------|------------------------------------------------------|---------------------------------------------------------|
| 4.16      | 1.07                                                 | 0.05                                                    |
| 6.20      | 1.5                                                  | 0.2                                                     |
| 9.20      | 2.6                                                  | 0.2                                                     |
| 12.05     | 2.8                                                  | 0.3                                                     |



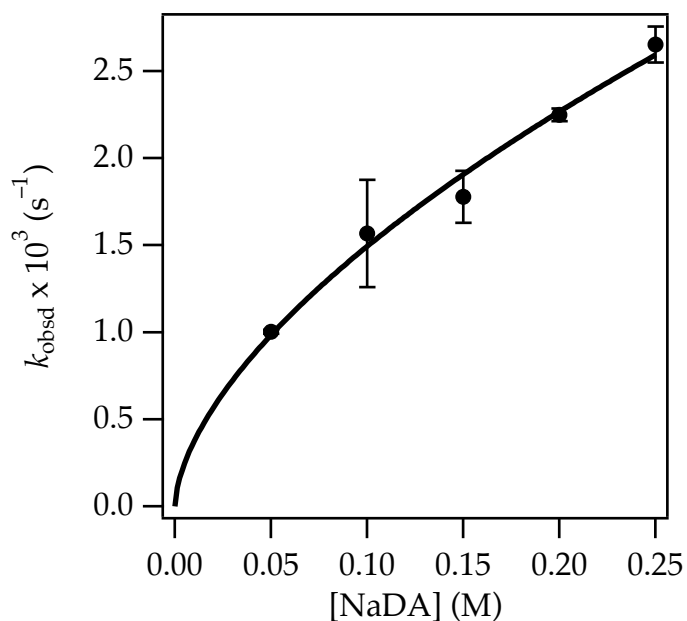

**Figure S-14.** Plot of  $k_{\text{obsd}}$  versus NaDA concentration following product growth at  $1601 \text{ cm}^{-1}$  (trimethylsilyl enol ether) with  $0.010 \text{ M}$  allyloxytrimethylsilane in  $6.0 \text{ M}$  THF/hexane at  $-78 \text{ }^\circ\text{C}$ . The curve depicts an unweighted least-squares fit to the function  $f(x) = ax^b$ :  $a = 6.0 \pm 0.6$ ;  $b = 0.60 \pm 0.05$ .

| [NaDA] (M) | $k_{\text{obsd}} \times 10^3 \text{ (s}^{-1}\text{)}$ | Standard deviation $\times 10^3 \text{ (s}^{-1}\text{)}$ |
|------------|-------------------------------------------------------|----------------------------------------------------------|
| 0.05       | 1.00                                                  | 0.01                                                     |
| 0.10       | 1.6                                                   | 0.3                                                      |
| 0.15       | 1.8                                                   | 0.1                                                      |
| 0.20       | 2.25                                                  | 0.04                                                     |
| 0.25       | 2.7                                                   | 0.1                                                      |

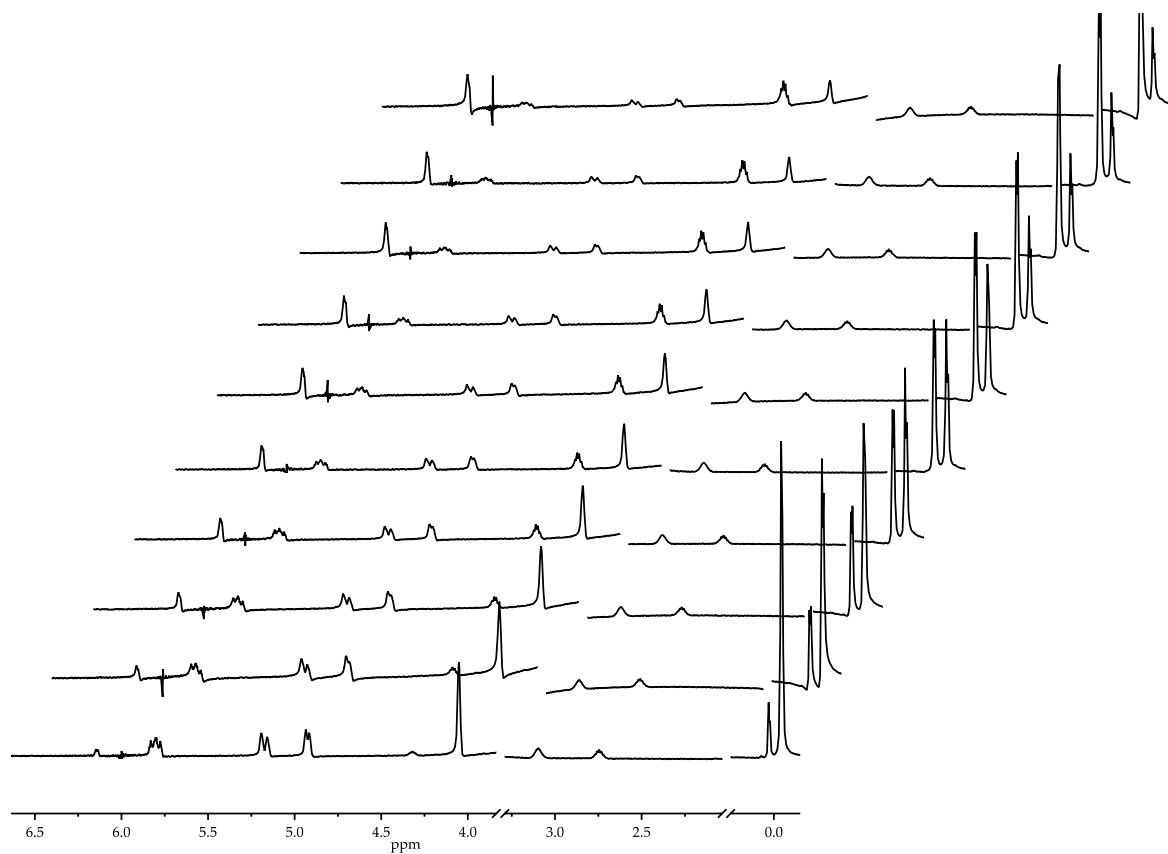

**Figure S-15.** <sup>1</sup>H NMR spectra of 0.78 M allyloxy-*tert*-butyldimethylsilane with 0.27 M NaDA in neat THF at  $-80\text{ }^{\circ}\text{C}$ . Each spectrum corresponds to an interval of 881 seconds.

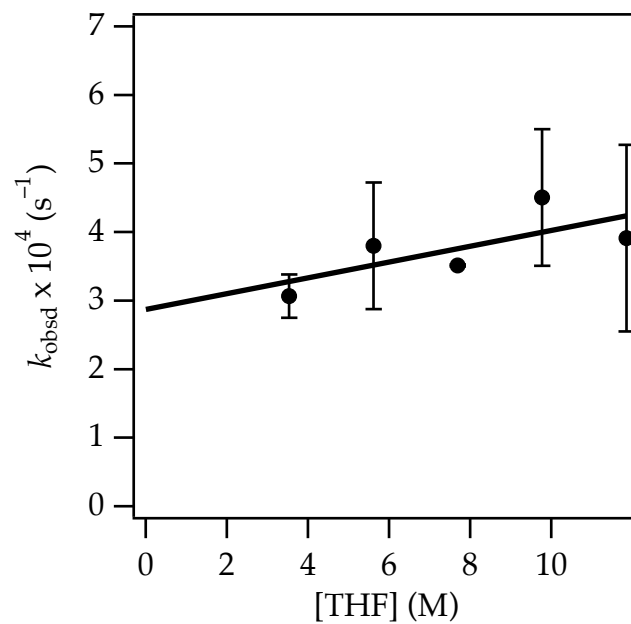

**Figure S-16.** Plot of  $k_{\text{obsd}}$  versus THF concentration following product growth at  $1664\text{ cm}^{-1}$  (*tert*-butyldimethylsilyl enol ether) with  $0.010\text{ M}$  allyloxy-*tert*-butyldimethylsilane in  $6.00\text{ M}$  THF/hexane at  $-78\text{ }^{\circ}\text{C}$ . The curve depicts an unweighted least-squares fit to the function  $f(x) = ax + b$ :  $a = 0.12 \pm 0.06$ ;  $b = 2.9 \pm 0.5$ .

| [THF] (M) | $k_{\text{obsd}} \times 10^4\text{ (s}^{-1}\text{)}$ | Standard deviation $\times 10^4\text{ (s}^{-1}\text{)}$ |
|-----------|------------------------------------------------------|---------------------------------------------------------|
| 3.53      | 3.1                                                  | 0.3                                                     |
| 5.61      | 3.8                                                  | 0.9                                                     |
| 7.69      | 3.51                                                 | 0.01                                                    |
| 9.77      | 4.5                                                  | 1                                                       |
| 11.9      | 3.9                                                  | 1.4                                                     |

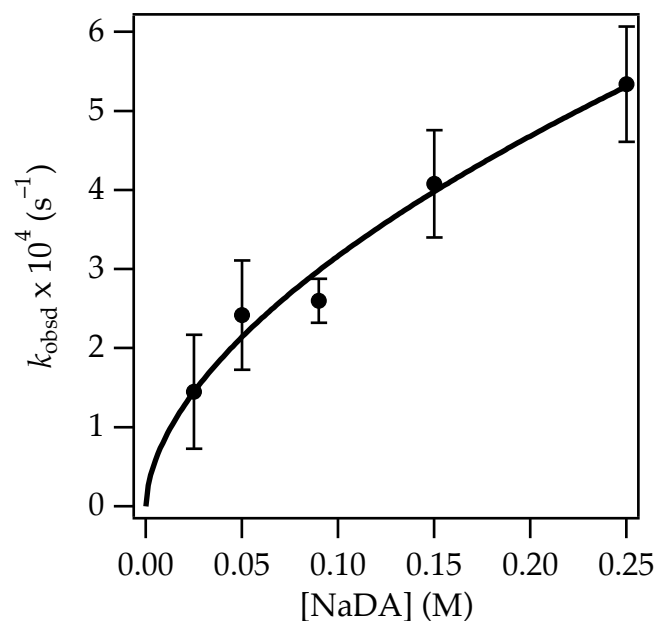

**Figure S-17.** Plot of initial rate versus NaDA concentration following product growth at  $1664 \text{ cm}^{-1}$  (*tert*-butyldimethylsilyl enol ether) with  $0.010 \text{ M}$  allyloxy-*tert*-butyldimethylsilane in  $6.0 \text{ M}$  THF/hexane at  $-78 \text{ }^\circ\text{C}$ . The curve depicts an unweighted least-squares fit to the function  $f(x) = ax^b$ :  $a = 12 \pm 1$ ;  $b = 0.56 \pm 0.06$ .

| [NaDA] (M) | $k_{\text{obsd}} \times 10^4 \text{ (s}^{-1}\text{)}$ | Standard deviation $\times 10^4 \text{ (s}^{-1}\text{)}$ |
|------------|-------------------------------------------------------|----------------------------------------------------------|
| 0.025      | 1.5                                                   | 0.7                                                      |
| 0.050      | 2.4                                                   | 0.7                                                      |
| 0.090      | 2.6                                                   | 0.3                                                      |
| 0.15       | 4.1                                                   | 0.7                                                      |
| 0.25       | 5.3                                                   | 0.7                                                      |

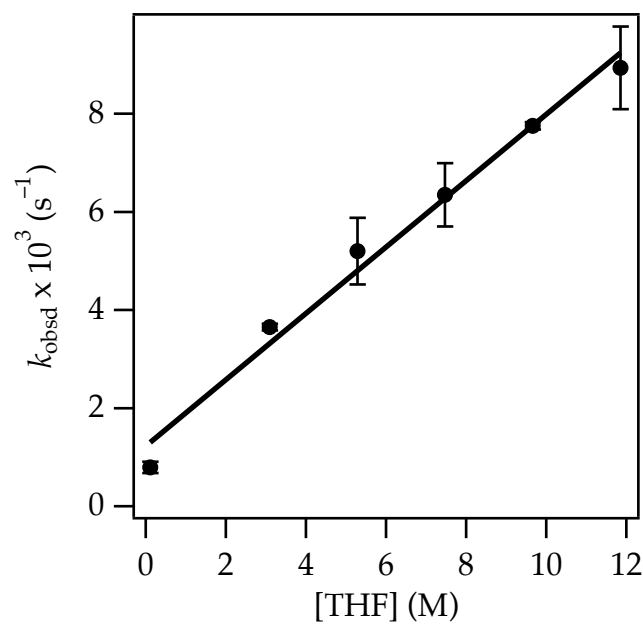

**Figure S-18.** Plot of  $k_{\text{obsd}}$  versus THF concentration following product growth at  $1661\text{ cm}^{-1}$  (triisopropylsilyl enol ether) with  $0.010\text{ M}$  allyloxytriisopropylsilane and  $0.10\text{ M}$  NaDA with hexane cosolvent at  $0\text{ }^{\circ}\text{C}$ . The curve depicts an unweighted least-squares fit to the function  $f(x) = ax + b$ :  $a = 0.68 \pm 0.04$ ;  $b = 1.2 \pm 0.3$ .

| [THF] (M) | $k_{\text{obsd}} \times 10^3\text{ (s}^{-1}\text{)}$ | Standard deviation $\times 10^3\text{ (s}^{-1}\text{)}$ |
|-----------|------------------------------------------------------|---------------------------------------------------------|
| 0.11      | 0.8                                                  | 0.1                                                     |
| 3.09      | 3.66                                                 | 0.07                                                    |
| 5.28      | 5.2                                                  | 0.7                                                     |
| 7.47      | 6.3                                                  | 0.6                                                     |
| 9.66      | 7.76                                                 | 0.07                                                    |
| 11.9      | 8.9                                                  | 0.8                                                     |

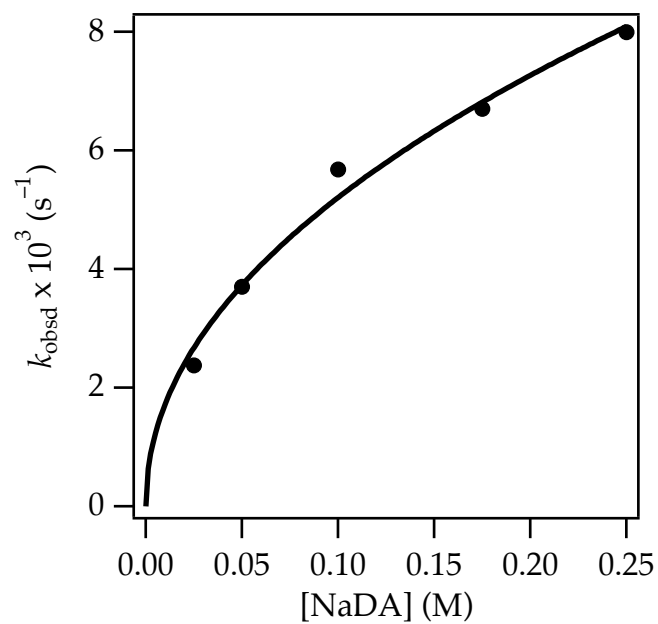

**Figure S-19.** Plot of  $k_{\text{obsd}}$  versus NaDA concentration following product growth at  $1661\text{ cm}^{-1}$  (triisopropylsilyl enol ether) with  $0.010\text{ M}$  allyloxytriisopropylsilane in  $5.28\text{ M}$  THF/hexane at  $0\text{ }^{\circ}\text{C}$ . The curve depicts an unweighted least-squares fit to the function  $f(x) = ax + b$ :  $a = 0.68 \pm 0.04$ ;  $b = 1.2 \pm 0.3$ .

| [NaDA] (M) | $k_{\text{obsd}} \times 10^3\text{ (s}^{-1}\text{)}$ |
|------------|------------------------------------------------------|
| 0.025      | 2.38                                                 |
| 0.050      | 3.70                                                 |
| 0.10       | 5.68                                                 |
| 0.175      | 6.70                                                 |
| 0.25       | 7.99                                                 |

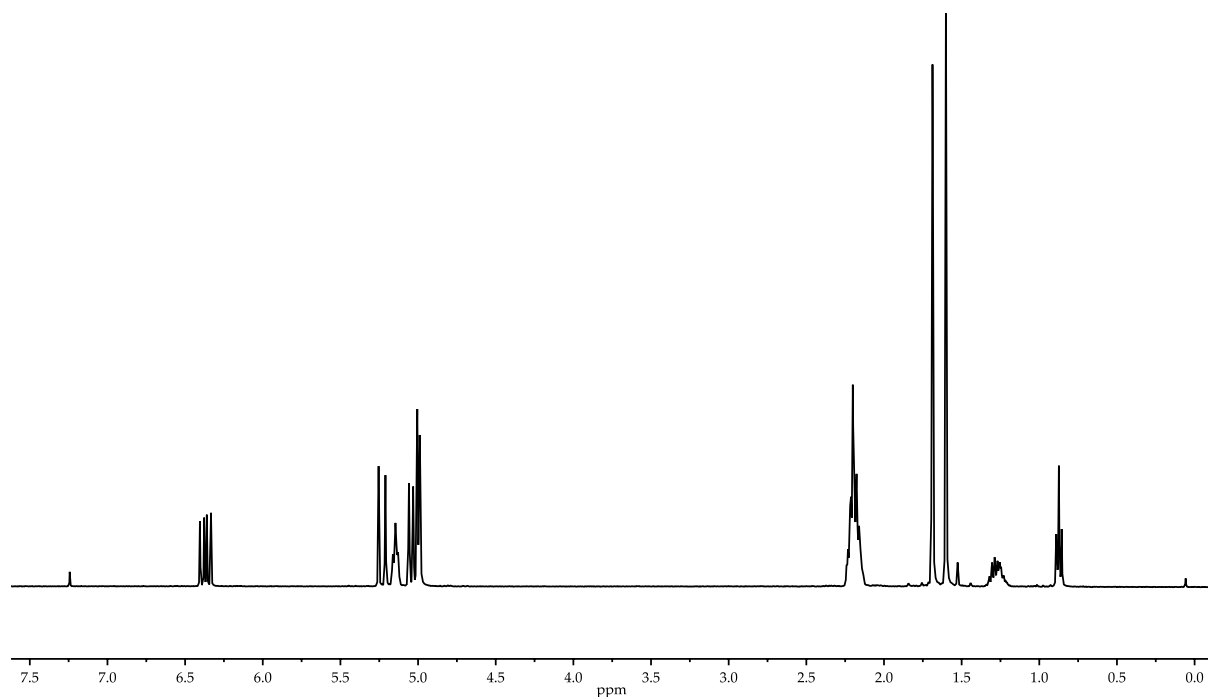

**Figure S-20.**  $^1\text{H}$  NMR spectrum ( $\text{CDCl}_3$ ) of myrcene recovered from reaction of NaDA/THF with trimethylsilyl ether of geraniol. Resonances at  $\delta$  0.85 ppm and  $\delta$  1.35 ppm correspond to residual pentane from chromatography.

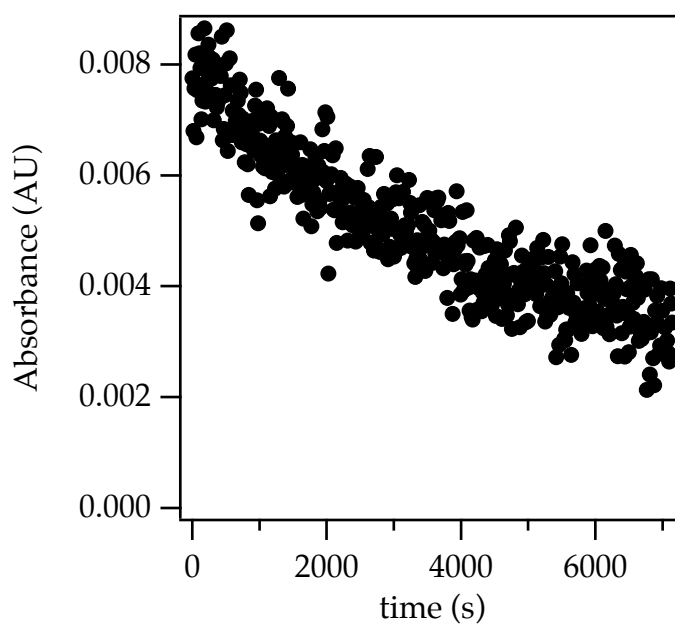

**Figure S-21.** Representative concentration trace showing loss of 0.050 M geraniol TMS ether **6** with 0.10 M NaDA in neat THF at  $-78^\circ\text{C}$  (monitored by ReactIR).

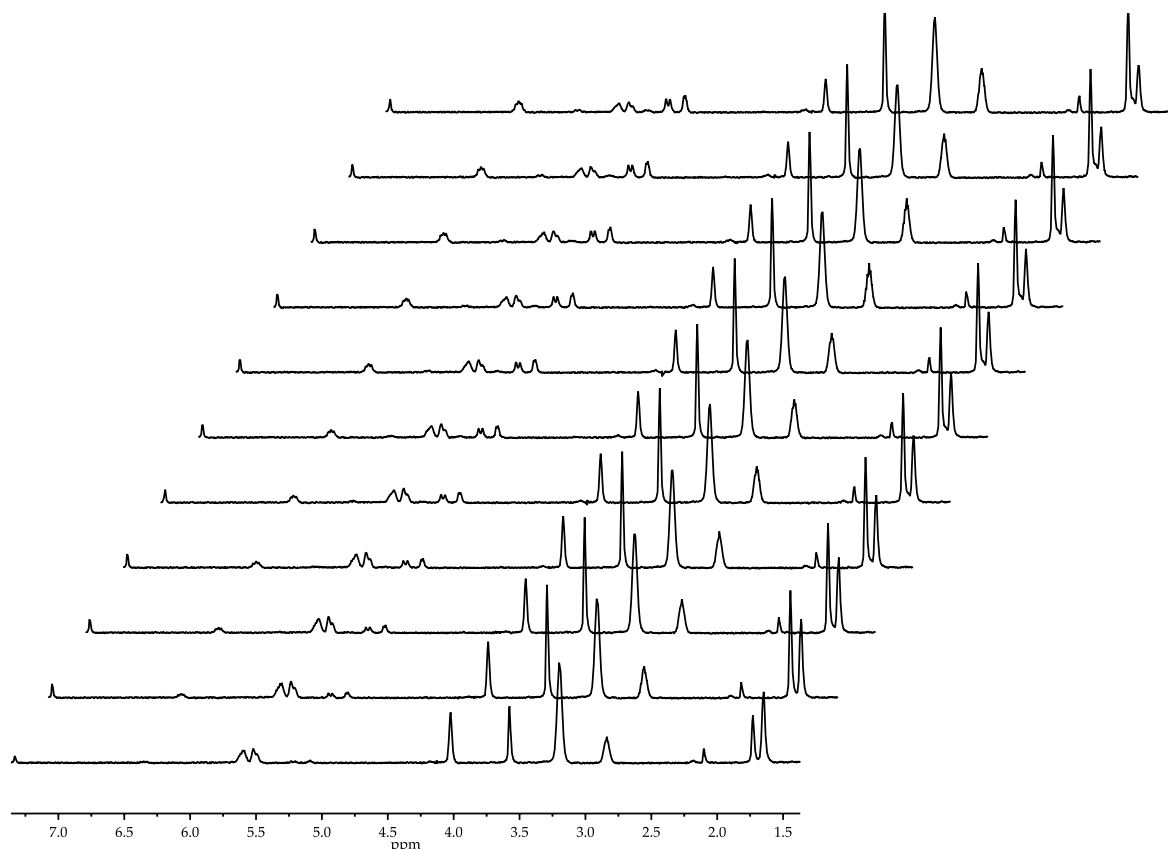

**Figure S-22.**  $^1\text{H}$  NMR spectra of 0.090 M trimethylsilyl ether of crotyl alcohol with 0.32 M NaDA in neat THF at  $-60\text{ }^\circ\text{C}$ . Each spectrum corresponds to an interval of 263 seconds. These spectra are consistent with stoichiometric consumption of NaDA to give 1,3-butadiene.

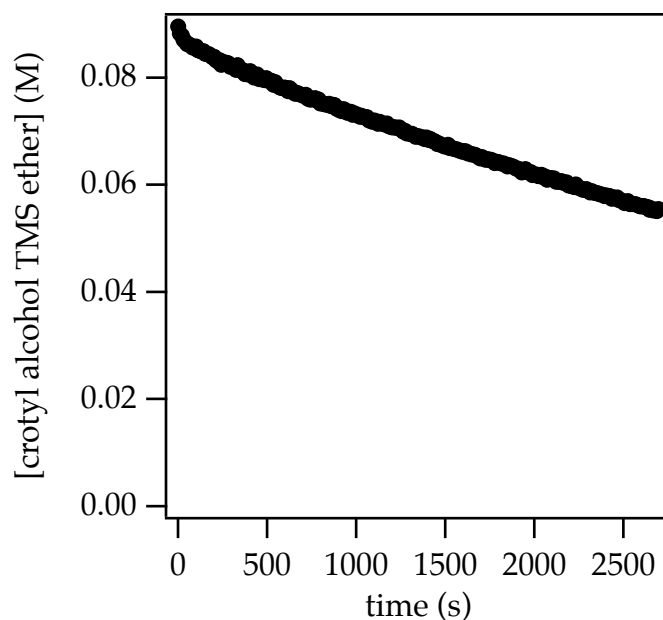

**Figure S-23.** Concentration of 0.090 M trimethylsilyl ether of crotyl alcohol with 0.32 M NaDA in neat THF at  $-60\text{ }^\circ\text{C}$ .



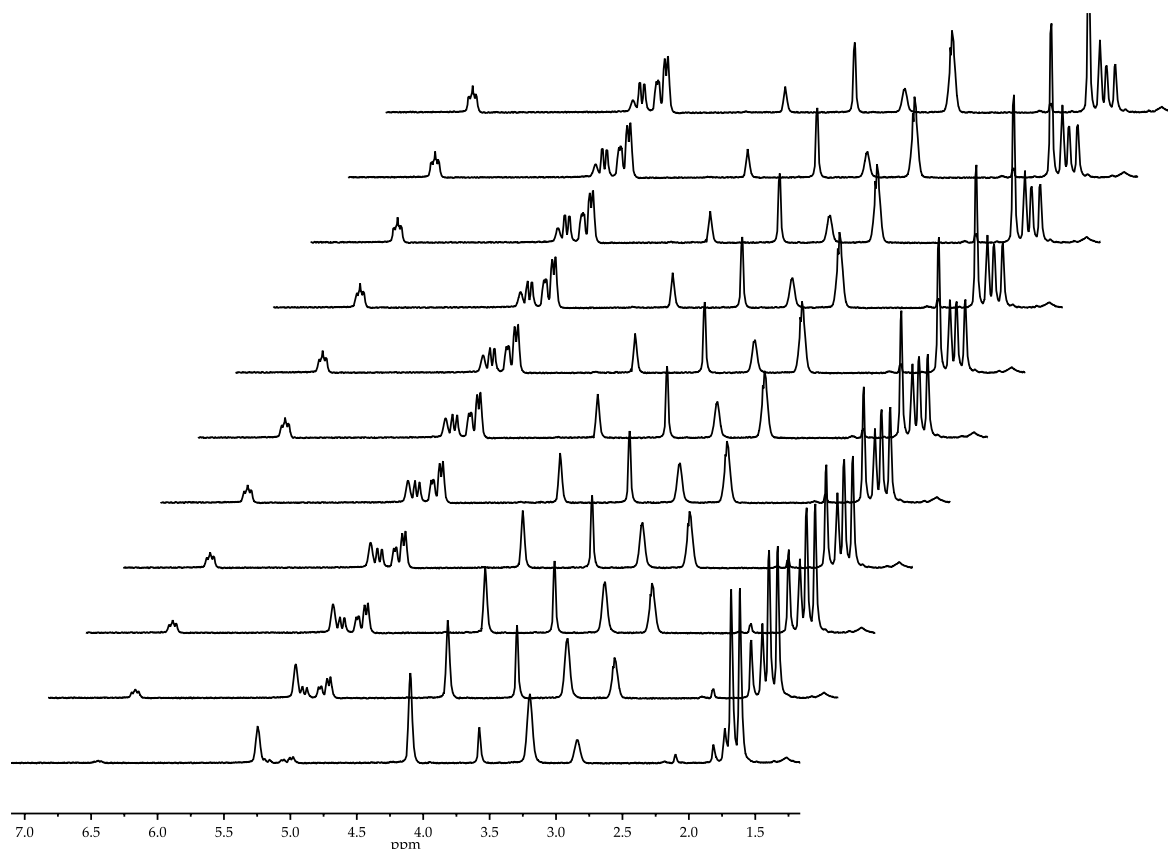

**Figure S-24.**  $^1\text{H}$  NMR spectra of 0.23 M trimethylsilyl ether of prenol with 0.30 M NaDA in neat THF at  $-60\text{ }^\circ\text{C}$ . Each spectrum corresponds to an interval of 131 seconds. These spectra are consistent with stoichiometric consumption of NaDA to give isoprene.

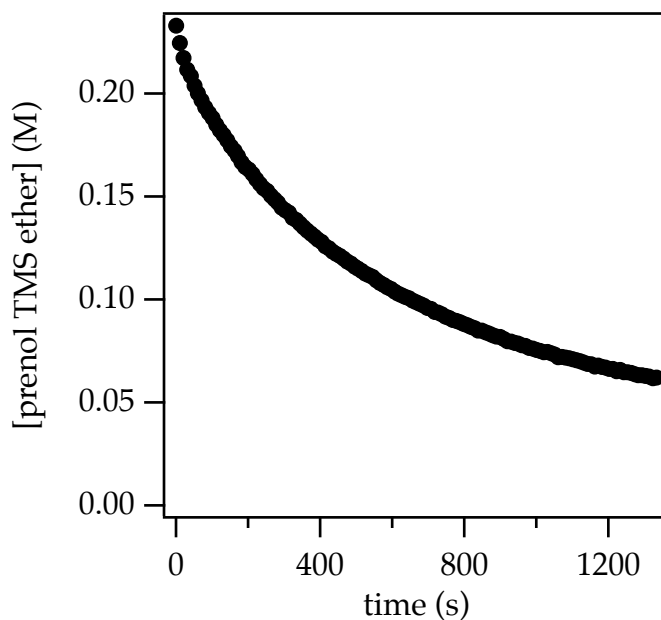

**Figure S-25.** Concentration of 0.23 M trimethylsilyl ether of prenol with 0.30 M NaDA in neat THF at  $-60\text{ }^\circ\text{C}$ .

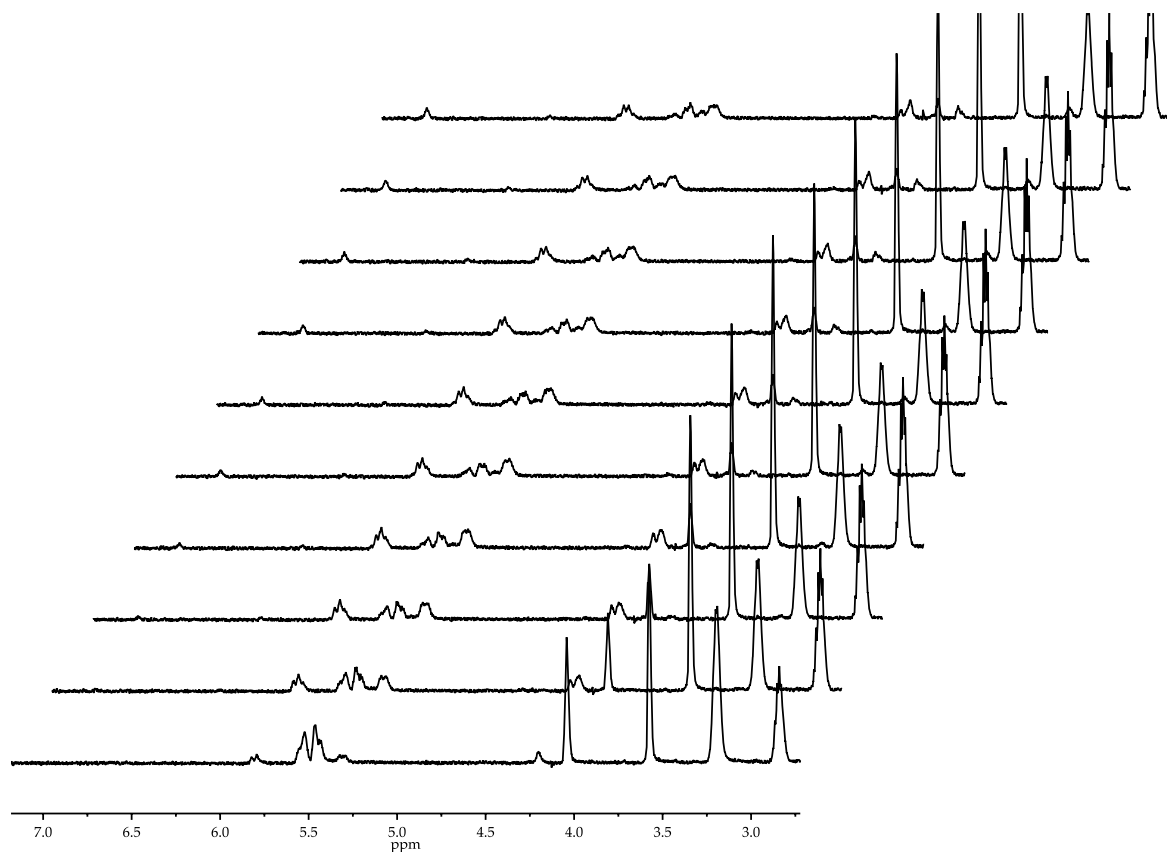

**Figure S-26.** <sup>1</sup>H NMR spectra of 0.080 M trimethylsilyl ether **8** with 0.19 M NaDA in neat THF at  $-40\text{ }^{\circ}\text{C}$ . Each spectrum corresponds to an interval of 626 seconds. These spectra are consistent with stoichiometric consumption of NaDA to give several products.

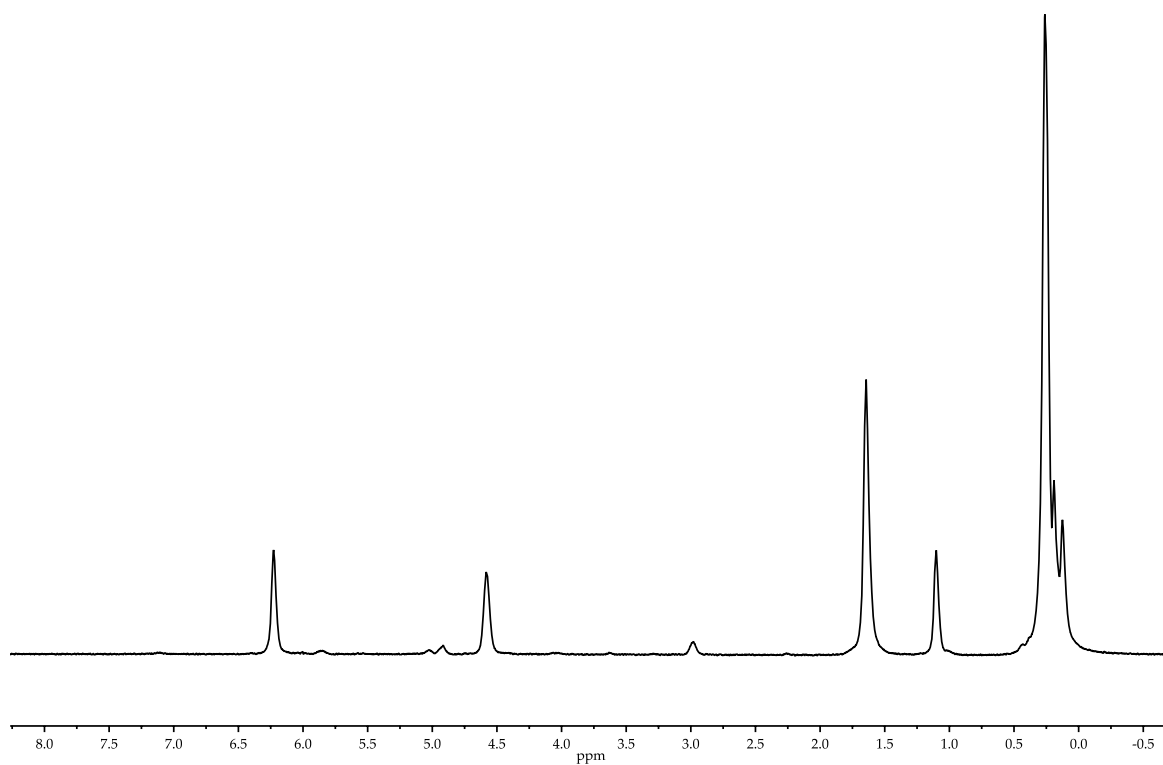

**Figure S-27.** <sup>1</sup>H NMR spectrum of isomerization of 1.5 mL neat allyloxytrimethylsilane with 7 mol % NaDA at room temperature after one minute. The resonances at 2.9 ppm and 1.1 ppm are consistent with diisopropylamine.

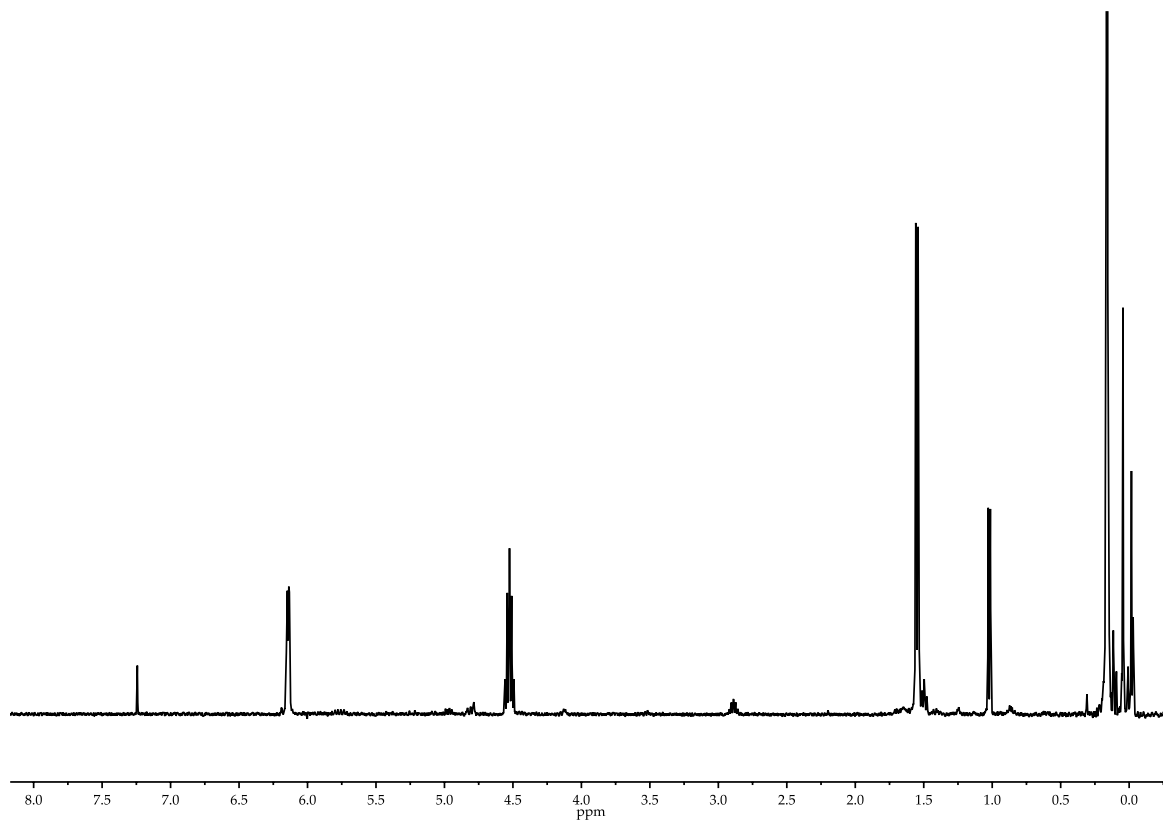

**Figure S-28.** <sup>1</sup>H NMR spectrum (CDCl<sub>3</sub>) of isolated material (distillation) from isomerization of 1.5 mL neat allyloxytrimethylsilane with 7 mol % NaDA at room temperature after one minute.

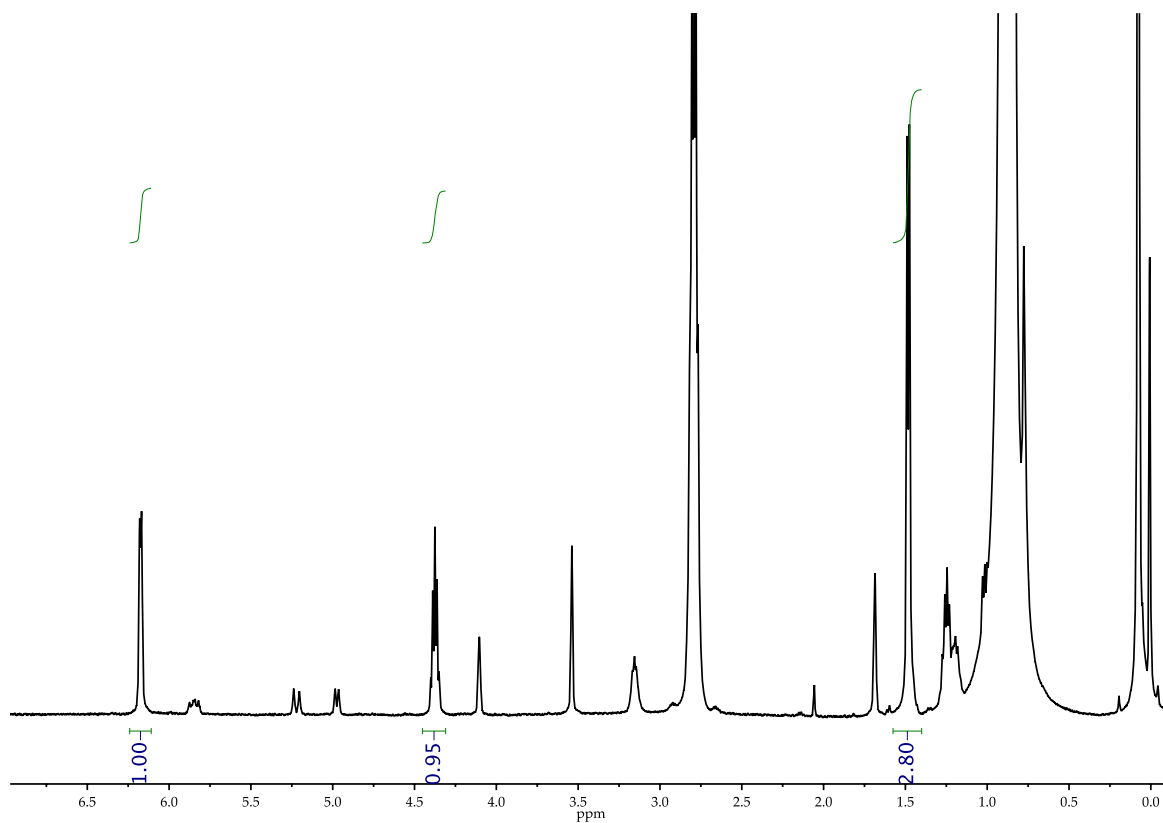

**Figure S-29.**  $^1\text{H}$  NMR spectrum of partial isomerization of 0.47 M allyloxy-*tert*-butyldimethylsilane with 0.094 M NaDA and 1.43 M  $\text{DNi-Pr}_2$  in  $\text{THF-}d_8$ . That the relative integration of the terminal methyl ( $\sim 1.4$  ppm) is significantly above 2 is consistent with predominant retention of protons from substrate without trapping of the allylsodium intermediate by  $\text{DNi-Pr}_2$ .

## II. Computations

Geometries are optimized at the B3LYP level of theory using the 6-31G(d) basis set. Energies are defined as follows:  $G$  is the sum of electronic and thermal free energies calculated at the B3LYP level of theory ( $T = 195$  K).  $G_{\text{MP2}}$  is derived from a MP2 single point calculation corresponding to the DFT-optimized geometry and includes a thermal correction from the DFT optimization.

**Table S-1.** Geometric coordinates and thermally corrected MP2 energies for 1-pentene.

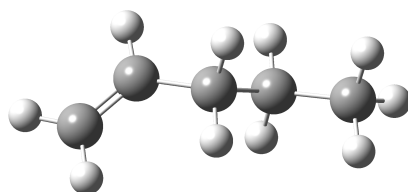

$G = -196.427062$  Hartree  
 $G_{\text{MP2}} = -195.6789852$  Hartree

| Atom | X           | Y           | Z           |
|------|-------------|-------------|-------------|
| C    | 0.00000000  | 0.00000000  | 0.00000000  |
| C    | -1.34505100 | 0.65407700  | -0.16177800 |
| C    | -2.41055200 | 0.09604400  | -0.73768800 |
| H    | -2.37937500 | -0.91648900 | -1.13602800 |
| H    | -3.35559300 | 0.62465400  | -0.83136300 |
| H    | -1.42477700 | 1.67371300  | 0.22098000  |
| H    | -0.04326100 | -1.03222700 | -0.37274100 |
| H    | 0.24798500  | -0.06478100 | 1.07124600  |
| C    | 1.13172800  | 0.76137100  | -0.71658500 |
| H    | 1.15496900  | 1.79890600  | -0.35477500 |
| H    | 0.90064400  | 0.81671400  | -1.78845700 |
| C    | 2.50583800  | 0.11609400  | -0.51279000 |
| H    | 2.52118500  | -0.91250900 | -0.89360800 |
| H    | 3.29061900  | 0.67579600  | -1.03417400 |
| H    | 2.77298800  | 0.07870800  | 0.55060700  |

**Table S-2.** Geometric coordinates and thermally corrected MP2 energies for [A(THF)<sub>2</sub>(1-pentene)]<sup>‡</sup>.

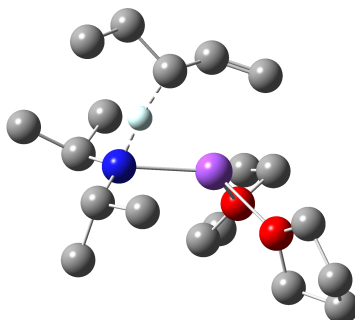

G = -1115.07229 Hartree  
 G<sub>MP2</sub> = -1111.273063 Hartree

| Atom | X           | Y           | Z           |   | X           | Y           | Z           |
|------|-------------|-------------|-------------|---|-------------|-------------|-------------|
|      |             |             |             | C | -6.34558600 | 2.89950500  | 0.58837300  |
|      |             |             |             | H | -7.37549900 | 2.57824100  | 0.37393100  |
|      |             |             |             | H | -5.70942600 | 2.62406400  | -0.25743300 |
| C    | 0.00000000  | 0.00000000  | 0.00000000  | O | -5.82157600 | -1.20240500 | 1.83235400  |
| C    | -1.49330000 | -0.22641000 | 0.25981600  | C | -6.97271100 | -1.04118500 | 2.68635100  |
| C    | -2.40677500 | 0.46614700  | -0.62462100 | H | -7.37053900 | -0.03551100 | 2.52427700  |
| C    | -3.64942800 | 0.08905100  | -1.05336800 | H | -6.65509500 | -1.13129300 | 3.73473900  |
| H    | -4.01271700 | -0.93019300 | -0.91481500 | C | -7.93480900 | -2.16557500 | 2.29965100  |
| H    | -4.24898000 | 0.73199500  | -1.69350600 | H | -8.60789100 | -2.44173000 | 3.11679600  |
| H    | -2.09247400 | 1.47583700  | -0.91588800 | H | -8.54566300 | -1.86864100 | 1.43872800  |
| H    | -1.72487400 | -1.30219700 | 0.31459300  | C | -6.96067800 | -3.28710200 | 1.90582500  |
| H    | 0.24201000  | 1.06639000  | 0.13815200  | H | -7.40802300 | -4.04301300 | 1.25382100  |
| H    | 0.27461300  | -0.22877100 | -1.04384000 | H | -6.57994700 | -3.79235300 | 2.80104500  |
| C    | 0.89422700  | -0.83882200 | 0.92092400  | C | -5.83876200 | -2.50851200 | 1.21253900  |
| H    | 0.71446600  | -1.91050800 | 0.76443500  | H | -4.85121500 | -2.96278400 | 1.33720600  |
| H    | 1.95872200  | -0.65191700 | 0.73183000  | H | -6.03417600 | -2.38252600 | 0.13995700  |
| H    | 0.69458900  | -0.62359900 | 1.97672700  | H | -1.99683400 | -0.34531600 | 3.83782500  |
| H    | -1.78085900 | 0.24358600  | 1.58894300  | C | -2.60817600 | 0.00743100  | 5.20927900  |
| N    | -2.25168400 | 0.66378500  | 2.80586900  | H | -2.43908900 | -0.80100000 | 5.93253000  |
| Na   | -4.21830800 | 0.49496900  | 1.51962400  | H | -3.69272200 | 0.15937800  | 5.11186000  |
| O    | -5.85479100 | 2.19753000  | 1.74938000  | H | -2.18035400 | 0.92108600  | 5.63524900  |
| C    | -6.01805400 | 3.02390700  | 2.92802600  | C | -2.54283500 | -1.70881800 | 3.38625600  |
| H    | -5.02593800 | 3.19016200  | 3.36176500  | H | -2.31227300 | -2.48339900 | 4.12835800  |
| H    | -6.63018400 | 2.48118900  | 3.65684300  | H | -2.10592500 | -2.01535100 | 2.43155700  |
| C    | -6.67163600 | 4.33138200  | 2.45416100  | H | -3.63492300 | -1.67160000 | 3.26950400  |
| H    | -7.76093200 | 4.28119900  | 2.56598500  | H | -0.91111100 | -0.48991000 | 4.00758100  |
| H    | -6.31618000 | 5.19870300  | 3.01775000  | C | -1.73105100 | 1.99834000  | 3.13094700  |
| C    | -6.29182500 | 4.37841600  | 0.96493000  | C | -0.21320100 | 2.06801800  | 3.41475800  |
| H    | -5.27402000 | 4.76408800  | 0.83727000  | H | 0.08988900  | 3.09445200  | 3.65963100  |
| H    | -6.97041400 | 4.99219200  | 0.36514200  |   |             |             |             |

|   |             |            |            |
|---|-------------|------------|------------|
| H | 0.36213900  | 1.74377600 | 2.53967200 |
| H | 0.07579100  | 1.43299900 | 4.25906900 |
| C | -2.07406400 | 2.98533100 | 2.00322400 |
| H | -1.76727900 | 4.00428400 | 2.27034900 |
| H | -3.15320800 | 3.00302900 | 1.80287400 |
| H | -1.56369000 | 2.71642000 | 1.07215600 |
| H | -2.23200400 | 2.38421800 | 4.03935100 |



**Table S-3.** Geometric coordinates and thermally corrected MP2 energies for pro-Z [A(THF)<sub>3</sub>(1-pentene)]<sup>‡</sup>.

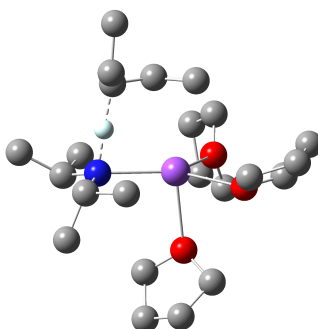

G = -1347.419378 Hartree  
G<sub>MP2</sub> = -1342.854422 Hartree

| Atom | X           | Y           | Z           |   |             |             |             |
|------|-------------|-------------|-------------|---|-------------|-------------|-------------|
|      |             |             |             | H | -3.16640300 | -2.72577100 | -3.47635100 |
|      |             |             |             | H | -1.44930400 | -2.31920000 | -3.27828700 |
| Na   | 0.00000000  | 0.00000000  | 0.00000000  | C | -2.18443600 | -3.68405800 | -1.74192700 |
| N    | 1.87182400  | -1.56019900 | -0.21990600 | H | -1.48822800 | -4.44415700 | -2.10781100 |
| C    | 2.38464500  | -1.81767100 | -1.57232200 | H | -3.14071100 | -4.17895600 | -1.53894400 |
| C    | 1.94030900  | -3.15395800 | -2.19923800 | C | -1.65666400 | -2.97750700 | -0.47423200 |
| H    | 2.33031000  | -3.24513100 | -3.22116800 | H | -2.19195800 | -3.30211300 | 0.42778000  |
| H    | 0.84502300  | -3.21152200 | -2.25069900 | H | -0.58478300 | -3.11732600 | -0.31946700 |
| H    | 2.29694000  | -4.02265600 | -1.63629400 | O | -1.52112100 | 0.48999600  | 1.94106300  |
| C    | 1.94411400  | -0.67275300 | -2.49522300 | C | -2.76331700 | -0.19034000 | 2.17842600  |
| H    | 2.41510600  | -0.74997300 | -3.48353000 | H | -2.91050400 | -0.88258600 | 1.34961700  |
| H    | 2.21365900  | 0.29907100  | -2.07043800 | H | -3.58204000 | 0.54669400  | 2.18532100  |
| H    | 0.85423900  | -0.69699500 | -2.64047100 | C | -2.61064000 | -0.85061100 | 3.56294900  |
| H    | 3.49337700  | -1.82565200 | -1.58543700 | H | -3.55260300 | -0.83465400 | 4.11962100  |
| C    | 2.08631200  | -2.66248300 | 0.72787100  | H | -2.30209500 | -1.89564100 | 3.46487900  |
| C    | 3.56408700  | -3.06349400 | 0.94488300  | C | -1.49657200 | -0.01102900 | 4.24944500  |
| H    | 3.64265600  | -3.90697900 | 1.64345900  | H | -0.61773900 | -0.62945400 | 4.45272300  |
| H    | 4.13960900  | -2.22635800 | 1.35486500  | H | -1.82137200 | 0.42997100  | 5.19653700  |
| H    | 4.04307600  | -3.36837900 | 0.00793600  | C | -1.16340900 | 1.06826300  | 3.20463000  |
| C    | 1.44788000  | -2.30399000 | 2.07935900  | H | -1.76157100 | 1.97807300  | 3.36969100  |
| H    | 1.54153200  | -3.13282700 | 2.79247300  | H | -0.10948200 | 1.34285700  | 3.15850200  |
| H    | 0.37946800  | -2.07888700 | 1.96286200  | O | -1.12014300 | 1.56497500  | -1.55027600 |
| H    | 1.93168300  | -1.42551200 | 2.52122600  | C | -2.08396000 | 2.43891600  | -0.92259100 |
| H    | 1.56705200  | -3.57354300 | 0.37397400  | H | -2.08556200 | 2.21656200  | 0.14721400  |
| O    | -1.86683700 | -1.55864700 | -0.66739100 | H | -3.08269500 | 2.22556000  | -1.33245100 |
| C    | -2.71532300 | -1.36455200 | -1.81001500 | C | -1.63769600 | 3.85820800  | -1.26905800 |
| H    | -2.48722600 | -0.37562200 | -2.21149500 | H | -2.45949700 | 4.57985900  | -1.22909300 |
| H    | -3.77347100 | -1.39603600 | -1.50304200 | H | -0.85347500 | 4.18664500  | -0.57826800 |
| C    | -2.38069900 | -2.52794800 | -2.74043300 | C | -1.06468100 | 3.66633800  | -2.68196200 |

H -0.35340500 4.44574100 -2.97062800  
H -1.87312800 3.65502000 -3.42274700  
C -0.40288300 2.28655400 -2.58043300  
H -0.45630800 1.71179500 -3.51093000  
H 0.64617000 2.36170100 -2.27454100  
C 3.28754300 0.60428000 0.83020200  
C 2.20682600 1.41003500 1.36032900  
C 1.47767800 2.40391400 0.77121100  
H 1.77322400 2.85359700 -0.17433700  
H 0.64437800 2.87408500 1.28822700  
H 1.85328300 1.08738100 2.34654800  
C 4.19081100 1.22154300 -0.23653800  
H 3.58285900 1.62769000 -1.05889200  
H 4.80957600 0.43443400 -0.69157400  
C 5.11364500 2.33989000 0.27930000  
H 5.78622700 1.95932500 1.05849600  
H 5.73655900 2.76209000 -0.52162800  
H 4.52761100 3.15479700 0.71936000  
H 3.88071700 0.15406800 1.63709700  
H 2.59317400 -0.51968400 0.27651100

**Table S-4.** Geometric coordinates and thermally corrected MP2 energies for pro-*E* [A(THF)<sub>3</sub>(1-pentene)]<sup>‡</sup>.

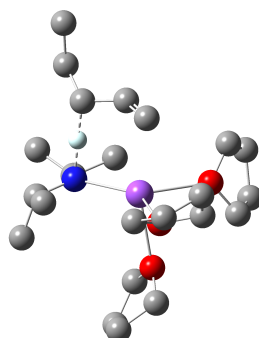

G = -1347.422632 Hartree  
G<sub>MP2</sub> = -1342.856104 Hartree

| Atom | X           | Y           | Z           | Atom | X          | Y           | Z           |
|------|-------------|-------------|-------------|------|------------|-------------|-------------|
|      |             |             |             | H    | 6.51199100 | 4.02684700  | 1.94252000  |
| C    | 0.00000000  | 0.00000000  | 0.00000000  | H    | 5.17456300 | 3.99972300  | 0.76653300  |
| C    | 1.44643100  | -0.07906100 | -0.48436200 | O    | 5.54954900 | 0.03549200  | 2.32611900  |
| C    | 2.31927200  | -0.97962100 | 0.23351100  | C    | 6.65885600 | 0.54211100  | 3.07937100  |
| C    | 3.44352800  | -1.62159500 | -0.20050800 | H    | 7.07784900 | 1.37135500  | 2.50904400  |
| H    | 3.69011300  | -1.66968300 | -1.26050000 | H    | 7.41947800 | -0.24818700 | 3.18609900  |
| H    | 4.05432100  | -2.22171000 | 0.46982200  | C    | 6.07175400 | 0.92703600  | 4.44760600  |
| H    | 2.10078200  | -1.06562800 | 1.30655400  | H    | 6.79921600 | 0.79409000  | 5.25416100  |
| H    | 1.49086700  | -0.23689900 | -1.57266400 | H    | 5.76178500 | 1.97641200  | 4.44886600  |
| H    | -0.49291700 | 0.87367400  | -0.45114900 | C    | 4.83705000 | -0.00676400 | 4.58972200  |
| H    | -0.01411200 | 0.18191300  | 1.08718100  | H    | 3.92444900 | 0.57614100  | 4.74183800  |
| C    | -0.85467700 | -1.24424400 | -0.29814100 | H    | 4.93168300 | -0.69957400 | 5.43127100  |
| H    | -0.43292000 | -2.13494200 | 0.18381400  | C    | 4.78950000 | -0.76280800 | 3.24567400  |
| H    | -1.89028200 | -1.12768700 | 0.05123700  | H    | 5.25525000 | -1.75630500 | 3.33313600  |
| H    | -0.88682800 | -1.44315200 | -1.37714600 | H    | 3.78893300 | -0.87926000 | 2.82819100  |
| H    | 2.12313000  | 1.17888900  | -0.36441800 | O    | 6.51917000 | -0.29923800 | -1.21604600 |
| N    | 2.88750400  | 2.30276000  | -0.34715300 | C    | 7.20783300 | -1.34692200 | -0.49814000 |
| Na   | 4.77452900  | 0.84811100  | 0.13801100  | H    | 6.72987000 | -1.44960700 | 0.47919700  |
| O    | 6.60449300  | 2.56645500  | 0.45898200  | H    | 8.25664900 | -1.04881100 | -0.35174200 |
| C    | 7.80598500  | 2.63770400  | -0.32237100 | C    | 7.10401200 | -2.59023400 | -1.38070800 |
| H    | 7.82841200  | 1.74575900  | -0.95049200 | H    | 7.90955300 | -3.30692600 | -1.19360700 |
| H    | 8.68796700  | 2.63854300  | 0.33932700  | H    | 6.14624200 | -3.09493700 | -1.21297500 |
| C    | 7.68873500  | 3.95956500  | -1.07794500 | C    | 7.14993100 | -1.97642300 | -2.78901800 |
| H    | 8.65115400  | 4.32963100  | -1.44503900 | H    | 6.71592900 | -2.62211500 | -3.55803800 |
| H    | 7.01666100  | 3.83791400  | -1.93437000 | H    | 8.18533400 | -1.75679400 | -3.07571000 |
| C    | 7.05413100  | 4.87953900  | -0.01526600 | C    | 6.35392500 | -0.68013800 | -2.60203100 |
| H    | 6.41305700  | 5.64747800  | -0.45709300 | H    | 6.70905400 | 0.14122900  | -3.23330700 |
| H    | 7.83092900  | 5.38937900  | 0.56490000  | H    | 5.28525900 | -0.82914900 | -2.79396600 |
| C    | 6.25599900  | 3.90360400  | 0.88151800  | C    | 2.79517000 | 2.85658500  | -1.70407700 |

C 3.37128100 4.27660900 -1.86634100  
H 3.30208100 4.60152600 -2.91255900  
H 4.43044800 4.29557500 -1.57644100  
H 2.84277000 5.01865400 -1.25894000  
C 3.52211400 1.91901900 -2.68024800  
H 3.36932400 2.23293900 -3.72083400  
H 3.16395400 0.88970500 -2.58176300  
H 4.60491600 1.92905200 -2.48628800  
H 1.74097100 2.90714500 -2.04524200  
C 2.35185200 3.17784200 0.70352100  
C 0.87948400 3.61473500 0.52582600  
H 0.57969100 4.30091200 1.32902100  
H 0.20641200 2.75137000 0.54828100  
H 0.72130700 4.13527300 -0.42494600  
C 2.51901800 2.48796100 2.06668600  
H 2.15751600 3.12889000 2.88082400  
H 3.57242000 2.25255300 2.26598700  
H 1.95228500 1.55039000 2.09895800  
H 2.94127500 4.11389700 0.75472700

**Table S-5.** Geometric coordinates and thermally corrected MP2 energies for 1,4-pentadiene.

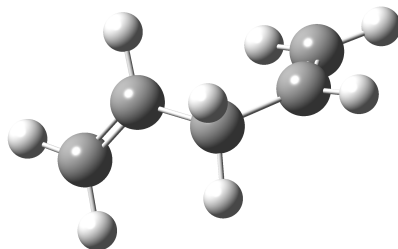

G = -195.196301 Hartree

G<sub>MP2</sub> = -194.4806266 Hartree

| Atom | X           | Y           | Z           |
|------|-------------|-------------|-------------|
| C    | 0.00000000  | 0.00000000  | 0.00000000  |
| H    | 0.28469200  | 0.45255400  | -0.96181500 |
| H    | -0.01737200 | 0.83380800  | 0.72058300  |
| C    | 1.04547400  | -0.99523000 | 0.42429700  |
| H    | 0.89593800  | -1.44602700 | 1.40627700  |
| C    | 2.10802900  | -1.34793500 | -0.29944800 |
| H    | 2.29239800  | -0.92933100 | -1.28710800 |
| H    | 2.83764000  | -2.06577900 | 0.06619400  |
| C    | -1.40497100 | -0.55318800 | -0.10755400 |
| H    | -2.18830900 | 0.19915300  | -0.20887600 |
| C    | -1.74339700 | -1.84261800 | -0.09728700 |
| H    | -0.99966800 | -2.63043400 | -0.00881500 |
| H    | -2.77995700 | -2.15642400 | -0.18562600 |

**Table S-6.** Geometric coordinates and thermally corrected MP2 energies for [A(THF)<sub>3</sub>·(1,4-pentadiene)]<sup>‡</sup>.

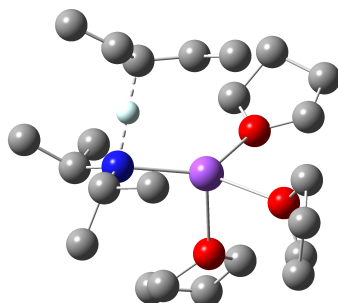

G = -1346.169909 Hartree  
G<sub>MP2</sub> = -1341.634158 Hartree

| Atom | X           | Y           | Z           |   | X           | Y           | Z           |
|------|-------------|-------------|-------------|---|-------------|-------------|-------------|
|      |             |             |             | H | -4.15346100 | -4.36565000 | -1.68765200 |
|      |             |             |             | H | -5.68101000 | -3.45961000 | -1.62654200 |
| C    | 0.00000000  | 0.00000000  | 0.00000000  | O | -4.45544700 | 0.37498300  | -1.05364700 |
| N    | -0.71360800 | -0.29172100 | -1.25047400 | C | -5.74716400 | 0.29936200  | -1.69580600 |
| Na   | -2.79623700 | -1.42128000 | -1.06212000 | C | -6.00106500 | 1.67337800  | -2.35347800 |
| O    | -3.95910900 | -2.39810400 | 0.79412900  | C | -4.61951200 | 2.35226800  | -2.30642900 |
| C    | -3.50013300 | -3.49286900 | 1.60556200  | C | -4.01514800 | 1.74567000  | -1.04255900 |
| C    | -3.35188000 | -2.91951300 | 3.02878500  | H | -2.92427100 | 1.73090200  | -1.01800700 |
| C    | -4.25213900 | -1.65216200 | 3.01719700  | H | -4.39083400 | 2.25098000  | -0.13909800 |
| C    | -4.88157500 | -1.66707500 | 1.61363200  | H | -4.68035600 | 3.44401800  | -2.26679000 |
| H    | -5.00588700 | -0.68400100 | 1.15725000  | H | -4.01651200 | 2.07357400  | -3.17754400 |
| H    | -5.85224000 | -2.18818000 | 1.62280000  | H | -6.72790600 | 2.24955400  | -1.77026600 |
| H    | -3.64908200 | -0.75009000 | 3.15762300  | H | -6.39424900 | 1.57944700  | -3.37009100 |
| H    | -5.01455900 | -1.66745200 | 3.80193100  | H | -5.69613500 | -0.52299100 | -2.41455500 |
| H    | -2.31149100 | -2.65367500 | 3.23356000  | H | -6.51171400 | 0.05781000  | -0.94578300 |
| H    | -3.66419300 | -3.64666000 | 3.78435800  | C | -0.45042500 | 0.66604000  | -2.33033200 |
| H    | -4.25176700 | -4.29699800 | 1.58015500  | C | 1.03851900  | 0.84479300  | -2.70763100 |
| H    | -2.57316700 | -3.85816600 | 1.15972700  | H | 1.14730200  | 1.55401900  | -3.53895000 |
| O    | -4.15755600 | -2.56073100 | -2.70558600 | H | 1.48793700  | -0.10864000 | -3.00569300 |
| C    | -4.85092500 | -3.75686500 | -2.27466800 | H | 1.62391500  | 1.23309800  | -1.86768000 |
| C    | -5.29573200 | -4.47389900 | -3.55323000 | C | -1.24960100 | 0.25129800  | -3.57626400 |
| C    | -4.22002800 | -4.03675900 | -4.55974600 | H | -1.11686900 | 0.97132800  | -4.39356000 |
| C    | -3.96972300 | -2.58893300 | -4.13775400 | H | -2.32304300 | 0.19193300  | -3.35190800 |
| H    | -4.69203500 | -1.90491000 | -4.60606100 | H | -0.92236900 | -0.73055700 | -3.93963500 |
| H    | -2.95984800 | -2.23173800 | -4.35513400 | H | -0.81811300 | 1.67470100  | -2.05349300 |
| H    | -4.54036000 | -4.12030800 | -5.60248800 | C | -0.23400600 | 1.41646300  | 0.56225000  |
| H    | -3.30971700 | -4.63340200 | -4.43158400 | H | 0.10301600  | 2.19994200  | -0.12489100 |
| H    | -6.28320900 | -4.11903700 | -3.87204400 | H | 0.31004500  | 1.55397900  | 1.50583000  |
| H    | -5.35196900 | -5.55858700 | -3.42290600 | H | -1.30252600 | 1.57949700  | 0.76209300  |

C -0.41364300 -1.02589000 1.06534300  
H 0.19817000 -0.92467600 1.97080300  
H -0.30690500 -2.05063900 0.69562600  
H -1.46392000 -0.87532300 1.35561700  
H 1.09289900 -0.11197600 -0.13234500  
C 0.35180400 -2.73715300 -2.10809000  
H 0.55386200 -2.52585500 -3.16624700  
C 1.59616900 -2.97547600 -1.35348800  
H 1.47644200 -3.34760500 -0.33310100  
C 2.84909700 -2.72707700 -1.77112700  
H 3.05614900 -2.36741700 -2.77788000  
H 3.70866700 -2.87202100 -1.12196000  
C -0.76483500 -3.67615900 -1.95835700  
H -1.51666100 -3.59471800 -2.75028200  
C -1.05263600 -4.55017700 -0.96291500  
H -0.36266800 -4.75736700 -0.14845200  
H -1.95647400 -5.15415500 -0.99041700  
H -0.15960900 -1.53746400 -1.68933600

**Table S-7.** Geometric coordinates and thermally corrected MP2 energies for 1,4-cyclohexadiene.

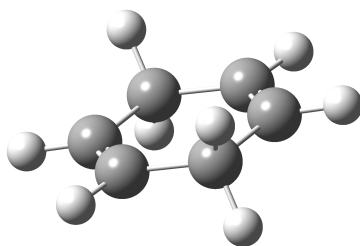

G = -233.310874 Hartree

G<sub>MP2</sub> = -232.4838718 Hartree

| Atom | X           | Y           | Z           |
|------|-------------|-------------|-------------|
| C    | 0.00000000  | 0.00000000  | 0.00000000  |
| C    | 1.25515400  | -0.83325500 | -0.00004200 |
| C    | 1.25515400  | -2.16801300 | -0.00004200 |
| C    | 0.00000000  | -3.00126800 | 0.00000000  |
| C    | -1.25515400 | -2.16801300 | -0.00004200 |
| C    | -1.25515400 | -0.83325500 | -0.00004200 |
| H    | -2.20112300 | -0.29343500 | -0.00006700 |
| H    | -2.20112300 | -2.70783300 | -0.00006700 |
| H    | 0.00000000  | -3.67865300 | -0.87080500 |
| H    | 0.00000000  | -3.67858500 | 0.87085100  |
| H    | 2.20112300  | -2.70783300 | -0.00006700 |
| H    | 2.20112300  | -0.29343500 | -0.00006700 |
| H    | 0.00000000  | 0.67731700  | 0.87085100  |
| H    | 0.00000000  | 0.67738500  | -0.87080500 |



**Table S-8.** Geometric coordinates and thermally corrected MP2 energies for  $[A(\text{THF})_3 \cdot (1,4\text{-cyclohexadiene})]^\ddagger$ .

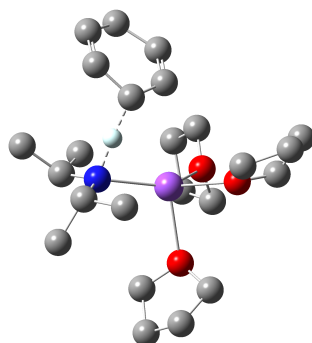

G = -1384.281914 Hartree

G<sub>MP2</sub> = -1379.639054 Hartree

| Atom | X           | Y           | Z           |   | X           | Y           | Z           |
|------|-------------|-------------|-------------|---|-------------|-------------|-------------|
|      |             |             |             | H | 4.87135700  | 1.71775200  | -1.16355400 |
|      |             |             |             | H | 3.18736800  | 2.17743100  | -1.49053600 |
| Na   | 0.00000000  | 0.00000000  | 0.00000000  | C | 3.75152100  | 2.44182400  | 0.59998500  |
| N    | -1.19409600 | 2.03014500  | -0.21291100 | H | 3.61736000  | 3.52217100  | 0.49511900  |
| C    | -0.91557800 | 3.00583900  | -1.27507500 | H | 4.65792100  | 2.27330400  | 1.19229900  |
| C    | -0.04379700 | 4.20223100  | -0.84706600 | C | 2.53472200  | 1.76989300  | 1.26576000  |
| H    | 0.14820600  | 4.86246200  | -1.70278800 | H | 2.71377500  | 1.53834900  | 2.32275800  |
| H    | 0.92605500  | 3.85740100  | -0.46301500 | H | 1.62247700  | 2.36760400  | 1.18388400  |
| H    | -0.51695700 | 4.80669600  | -0.06703500 | O | 0.10653400  | -1.70991600 | 1.71684100  |
| C    | -0.23697100 | 2.29506800  | -2.45574100 | C | 1.21174200  | -1.84539600 | 2.62269800  |
| H    | -0.09446700 | 2.98005800  | -3.30143100 | H | 1.99416000  | -1.16782100 | 2.27869600  |
| H    | -0.83696000 | 1.45030000  | -2.80567700 | H | 1.58623400  | -2.88086800 | 2.58628400  |
| H    | 0.75238900  | 1.91619000  | -2.15970000 | C | 0.63128700  | -1.51903100 | 4.00785200  |
| H    | -1.85637000 | 3.43715000  | -1.67359900 | H | 1.14388400  | -2.06852600 | 4.80327100  |
| C    | -1.72603700 | 2.62250200  | 1.02579500  | H | 0.73411300  | -0.45064700 | 4.22184200  |
| C    | -3.03254100 | 3.43161700  | 0.86576500  | C | -0.86827500 | -1.90704300 | 3.87492400  |
| H    | -3.32812500 | 3.87801300  | 1.82460500  | H | -1.51293500 | -1.05872300 | 4.11964000  |
| H    | -3.85017900 | 2.79085100  | 0.51831900  | H | -1.14381700 | -2.73490800 | 4.53504100  |
| H    | -2.91716900 | 4.25096200  | 0.14721400  | C | -1.01978100 | -2.30269400 | 2.39210200  |
| C    | -1.93782300 | 1.51108200  | 2.06484000  | H | -0.97192000 | -3.39539600 | 2.26875100  |
| H    | -2.34913100 | 1.91685800  | 2.99750100  | H | -1.92387100 | -1.92940700 | 1.90834100  |
| H    | -0.98846100 | 1.01565300  | 2.31279400  | O | 0.64801500  | -1.51613600 | -1.74493200 |
| H    | -2.63310700 | 0.75208200  | 1.68758400  | C | 1.01032300  | -2.86989900 | -1.39542900 |
| H    | -0.97974700 | 3.31402600  | 1.45934200  | H | 0.72974000  | -3.02267600 | -0.35098600 |
| O    | 2.29695800  | 0.53386900  | 0.54639800  | H | 2.09963200  | -2.99137000 | -1.49424800 |
| C    | 3.36031200  | 0.31888700  | -0.39854700 | C | 0.26611300  | -3.75547400 | -2.39179900 |
| H    | 2.93780100  | -0.24233900 | -1.23560600 | H | 0.72867100  | -4.74025400 | -2.50865400 |
| H    | 4.15810000  | -0.27975500 | 0.06789300  | H | -0.77254900 | -3.89747400 | -2.07205400 |
| C    | 3.85632900  | 1.71825000  | -0.75452000 | C | 0.32581400  | -2.90034500 | -3.66762600 |

H -0.45925500 -3.14527300 -4.38860800  
H 1.29395400 -3.02861000 -4.16599500  
C 0.18168900 -1.47403600 -3.11945900  
H 0.77826100 -0.73823900 -3.66808100  
H -0.86190800 -1.14283700 -3.11085500  
C -3.06961800 0.29917700 -1.36911700  
C -4.43507400 0.85112800 -1.26499100  
C -5.37791600 0.38340000 -0.42530600  
C -5.15023200 -0.80864500 0.48184400  
C -3.88146800 -1.54600000 0.10512500  
C -2.97232800 -1.03533400 -0.75551700  
H -2.10324600 -1.65176400 -1.00785600  
H -3.74107000 -2.54386800 0.52190500  
H -5.12239000 -0.49255800 1.54410500  
H -6.01412200 -1.49642200 0.43301600  
H -6.35549500 0.86198400 -0.37874900  
H -4.67562400 1.71155100 -1.89178500  
H -2.69316100 0.31196000 -2.40282000  
H -2.14702000 1.20469100 -0.74074700

**Table S-9.** Geometric coordinates and thermally corrected MP2 energies for allyl methyl ether.

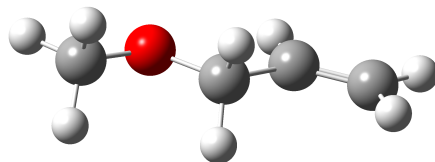

G = -232.316236 Hartree

G<sub>MP2</sub> = -231.5298026 Hartree

| Atom | X           | Y           | Z           |
|------|-------------|-------------|-------------|
| C    | 0.00000000  | 0.00000000  | 0.00000000  |
| H    | -0.76316100 | -0.78262600 | -0.00015300 |
| H    | -0.13659800 | 0.63226600  | 0.89297300  |
| H    | -0.13651100 | 0.63252900  | -0.89279900 |
| O    | 1.25529000  | -0.64147500 | -0.00003400 |
| C    | 2.33503700  | 0.27428800  | 0.00015400  |
| H    | 2.27760500  | 0.93251000  | -0.88578100 |
| H    | 2.27751100  | 0.93225000  | 0.88627700  |
| C    | 3.62214700  | -0.51204900 | 0.00010800  |
| H    | 3.48782200  | -1.59248700 | 0.00022700  |
| C    | 4.84346100  | 0.01906400  | -0.00004400 |
| H    | 5.00828100  | 1.09534300  | -0.00016900 |
| H    | 5.73301500  | -0.60403300 | -0.00004800 |

**Table S-10.** Geometric coordinates and thermally corrected MP2 energies for pro-Z [A(THF)<sub>3</sub>·(allyl methyl ether)]<sup>‡</sup>.

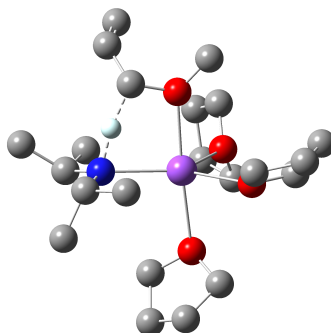

G = -1383.296497 Hartree

G<sub>MP2</sub> = -1378.692455 Hartree

| Atom | X           | Y           | Z           |   | X           | Y           | Z           |
|------|-------------|-------------|-------------|---|-------------|-------------|-------------|
|      |             |             |             | H | 2.72425500  | 4.60387200  | 0.32938200  |
|      |             |             |             | H | 1.46489200  | 3.84518400  | -0.66752400 |
| Na   | 0.00000000  | 0.00000000  | 0.00000000  | C | 0.79473700  | 4.28178100  | 1.36133400  |
| N    | -2.02382300 | 1.08297800  | -0.79721800 | H | 0.07347200  | 5.00188600  | 0.96419900  |
| C    | -1.99530400 | 1.91826600  | -2.00311500 | H | 1.24841300  | 4.72218800  | 2.25654400  |
| C    | -2.03192500 | 3.43501300  | -1.73958300 | C | 0.13650300  | 2.92755500  | 1.69272500  |
| H    | -1.96738100 | 3.99116700  | -2.68388500 | H | -0.03828700 | 2.80426300  | 2.76882400  |
| H    | -1.18376600 | 3.73775300  | -1.11080400 | H | -0.80410800 | 2.77175800  | 1.15857200  |
| H    | -2.95216500 | 3.74992300  | -1.23690700 | O | 0.50340200  | -1.29413300 | 1.97655100  |
| C    | -0.73456600 | 1.58132000  | -2.81356400 | C | 0.91845400  | -0.79194300 | 3.25342500  |
| H    | -0.72820100 | 2.10882300  | -3.77607600 | H | 1.20041300  | 0.25212700  | 3.11007800  |
| H    | -0.67302700 | 0.50732900  | -3.01588100 | H | 1.79503400  | -1.36111600 | 3.60283600  |
| H    | 0.16784400  | 1.87988700  | -2.26047500 | C | -0.28730800 | -1.01548500 | 4.17975900  |
| H    | -2.85786800 | 1.69610700  | -2.66477900 | H | 0.02075600  | -1.18965000 | 5.21530500  |
| C    | -3.14175700 | 1.36386600  | 0.11626400  | H | -0.94230900 | -0.13897400 | 4.16939800  |
| C    | -4.54818000 | 1.25252500  | -0.51566300 | C | -1.00869200 | -2.23996900 | 3.55044800  |
| H    | -5.32523100 | 1.50002900  | 0.21931700  | H | -2.05559000 | -2.00897500 | 3.33746500  |
| H    | -4.73178700 | 0.23314200  | -0.87232800 | H | -0.98842800 | -3.11542700 | 4.20663000  |
| H    | -4.67063500 | 1.93495500  | -1.36405800 | C | -0.22726700 | -2.50370100 | 2.24588400  |
| C    | -3.05372400 | 0.42261400  | 1.32736000  | H | 0.48605000  | -3.33263400 | 2.37296000  |
| H    | -3.83894700 | 0.65100200  | 2.05934900  | H | -0.85244500 | -2.69568000 | 1.37370700  |
| H    | -2.08510100 | 0.52619300  | 1.83475700  | O | 2.21933700  | -0.34408600 | -1.00100800 |
| H    | -3.17435000 | -0.62248600 | 1.01804900  | C | 3.14364300  | -1.20203500 | -0.29547800 |
| H    | -3.05301000 | 2.39339500  | 0.51172500  | H | 2.60538100  | -1.65081800 | 0.54308200  |
| O    | 1.05060400  | 1.89739700  | 1.24125900  | H | 3.96779300  | -0.59025100 | 0.09984000  |
| C    | 2.28182900  | 2.50749100  | 0.82197500  | C | 3.65017300  | -2.20548000 | -1.33176700 |
| H    | 2.71047600  | 1.86596500  | 0.04925800  | H | 4.63417700  | -2.61145600 | -1.07821100 |
| H    | 2.98089500  | 2.56603700  | 1.67170200  | H | 2.94805900  | -3.04132400 | -1.42861100 |
| C    | 1.88436700  | 3.90205000  | 0.34325500  | C | 3.65056200  | -1.35685800 | -2.61296700 |

H 3.61555800 -1.95307900 -3.52955900  
H 4.54754200 -0.72735300 -2.65223900  
C 2.39568400 -0.49714400 -2.42852200  
H 2.48029800 0.49788700 -2.87670600  
H 1.50334400 -0.98672900 -2.83552400  
C -2.14345400 -1.51230700 -1.71394200  
C -3.31350700 -2.31562300 -1.38329200  
C -3.52727700 -3.16644500 -0.35509000  
H -2.74369100 -3.43179000 0.35028200  
H -4.49743700 -3.62817700 -0.19631200  
H -4.15667200 -2.12103800 -2.05314000  
H -1.97080800 -1.46612600 -2.80176700  
O -0.91148300 -1.92950300 -1.05898500  
C -0.37654100 -3.14169600 -1.56625400  
H -0.04046100 -3.01951900 -2.60888400  
H 0.48592000 -3.41849900 -0.94694800  
H -1.11844100 -3.94810600 -1.53212500  
H -2.20209500 -0.14485600 -1.25106400

**Table S-11.** Geometric coordinates and thermally corrected MP2 energies for pro-*E* [A(THF)<sub>3</sub>·(allyl methyl ether)]<sup>‡</sup>.

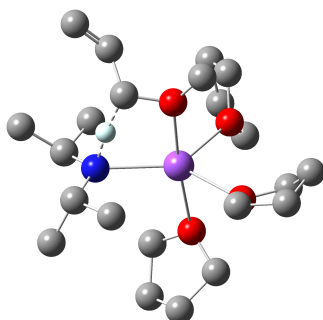

G = -1383.294895 Hartree  
 G<sub>MP2</sub> = -1378.689974 Hartree

| Atom | X           | Y           | Z           |   | X           | Y           | Z           |
|------|-------------|-------------|-------------|---|-------------|-------------|-------------|
|      |             |             |             | H | 3.12784200  | 4.32694600  | -0.49785200 |
|      |             |             |             | H | 1.71145400  | 3.58785800  | -1.27452400 |
| Na   | 0.00000000  | 0.00000000  | 0.00000000  | C | 1.29413600  | 4.31592800  | 0.73830900  |
| N    | -2.02751600 | 1.17882600  | -0.67558400 | H | 0.60565800  | 5.05927900  | 0.32600800  |
| C    | -2.06054100 | 1.82638800  | -1.99389000 | H | 1.87496800  | 4.80141400  | 1.53093000  |
| C    | -1.97603600 | 3.36283500  | -1.95711600 | C | 0.55207200  | 3.08042600  | 1.28405100  |
| H    | -1.95721900 | 3.77144500  | -2.97573600 | H | 0.46317600  | 3.09961500  | 2.37741400  |
| H    | -1.06023300 | 3.68802100  | -1.44514900 | H | -0.44201500 | 2.95536300  | 0.84715400  |
| H    | -2.82859100 | 3.81464900  | -1.43971600 | O | 0.59603300  | -1.14638500 | 2.04867200  |
| C    | -0.90742000 | 1.27579400  | -2.84545300 | C | 1.19045500  | -0.54729400 | 3.20807100  |
| H    | -0.95469100 | 1.65756700  | -3.87336700 | H | 1.54175900  | 0.44208700  | 2.91148600  |
| H    | -0.94048100 | 0.18239700  | -2.88870500 | H | 2.04935100  | -1.15635500 | 3.53223900  |
| H    | 0.06143300  | 1.57611000  | -2.42012600 | C | 0.08274900  | -0.54580800 | 4.27626900  |
| H    | -2.99412000 | 1.57759500  | -2.53752800 | H | 0.49137100  | -0.68108300 | 5.28234800  |
| C    | -3.04262400 | 1.66970900  | 0.27015900  | H | -0.46195000 | 0.40287400  | 4.26353400  |
| C    | -4.50627100 | 1.51083700  | -0.20114800 | C | -0.84807500 | -1.71377300 | 3.84330400  |
| H    | -5.20032100 | 1.91094300  | 0.54998900  | H | -1.86314800 | -1.35072500 | 3.66189100  |
| H    | -4.75160100 | 0.45557600  | -0.36800200 | H | -0.90631900 | -2.50422200 | 4.59756300  |
| H    | -4.69191400 | 2.05181000  | -1.13602900 | C | -0.21193600 | -2.22999900 | 2.53735000  |
| C    | -2.85554300 | 0.95477300  | 1.61710300  | H | 0.43261200  | -3.10189700 | 2.72933500  |
| H    | -3.57436500 | 1.31905200  | 2.36175800  | H | -0.92413600 | -2.47591600 | 1.74903200  |
| H    | -1.84547700 | 1.12261400  | 2.01292400  | O | 2.07427200  | -0.64354400 | -1.16147300 |
| H    | -3.00625000 | -0.12496700 | 1.50576800  | C | 3.04555100  | -1.44497700 | -0.45560300 |
| H    | -2.88496600 | 2.74648500  | 0.46239200  | H | 2.60635100  | -1.72797300 | 0.50429400  |
| O    | 1.32912800  | 1.92015000  | 0.89319700  | H | 3.94436000  | -0.83848900 | -0.26999000 |
| C    | 2.55784300  | 2.35453800  | 0.28731100  | C | 3.35840200  | -2.62377100 | -1.37763700 |
| H    | 2.84502300  | 1.59082000  | -0.43821700 | H | 4.34753800  | -3.05294500 | -1.19080600 |
| H    | 3.34430000  | 2.43982600  | 1.05420500  | H | 2.61172200  | -3.41609800 | -1.25091500 |
| C    | 2.23591900  | 3.71761900  | -0.32109400 | C | 3.22571100  | -1.97865000 | -2.76612100 |

H 3.02981700 -2.70137200 -3.56366700  
H 4.14238300 -1.43382700 -3.02154700  
C 2.05789600 -1.00676500 -2.56221100  
H 2.14524700 -0.09363600 -3.15959300  
H 1.09191500 -1.47472400 -2.78262400  
O -1.11997200 -1.93248700 -0.76983900  
C -2.44806000 -1.49777200 -1.21181500  
C -3.52891300 -2.19405500 -0.51899500  
C -4.76026700 -2.49294200 -0.98509300  
H -5.03202400 -2.33046400 -2.02676600  
H -5.54095300 -2.87604000 -0.33364600  
H -3.33045700 -2.39853700 0.53978900  
H -2.50521200 -1.60677200 -2.30736900  
C -0.79172900 -3.25856900 -1.14239600  
H -0.75711500 -3.36741900 -2.23857400  
H 0.19673900 -3.49530800 -0.72817600  
H -1.52770600 -3.97699400 -0.75571700  
H -2.32845200 -0.05600000 -0.91412600

**Table S-12.** Geometric coordinates and thermally corrected MP2 energies for allyloxytrimethylsilane.

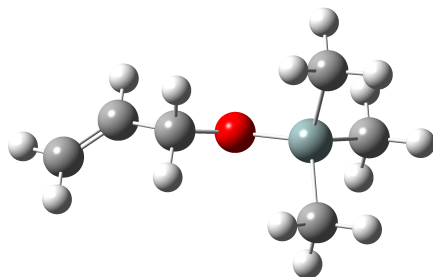

G = -601.664955 Hartree

G<sub>MP2</sub> = -600.0511662 Hartree

| Atom | X           | Y           | Z           |
|------|-------------|-------------|-------------|
| C    | 0.00000000  | 0.00000000  | 0.00000000  |
| H    | 0.05666200  | 1.04776400  | -0.33103700 |
| H    | -0.15535000 | 0.00852600  | 1.09195800  |
| C    | 1.28718400  | -0.70631600 | -0.31609100 |
| H    | 1.28161000  | -1.77998100 | -0.13002000 |
| C    | 2.38488800  | -0.10519900 | -0.77249900 |
| H    | 2.40903900  | 0.96361000  | -0.97682600 |
| H    | 3.30402600  | -0.65426200 | -0.95821300 |
| O    | -1.07830300 | -0.67941500 | -0.63431700 |
| Si   | -2.69405000 | -0.24700300 | -0.49355100 |
| C    | -2.97013000 | 1.49386900  | -1.17508900 |
| H    | -4.03086100 | 1.77048400  | -1.12537300 |
| H    | -2.41060500 | 2.25231400  | -0.61427900 |
| H    | -2.65873100 | 1.55930100  | -2.22428000 |
| C    | -3.62283100 | -1.51752900 | -1.52155400 |
| H    | -3.45599400 | -2.53136000 | -1.14032600 |
| H    | -4.70315600 | -1.32795500 | -1.50866500 |
| H    | -3.29129100 | -1.49641900 | -2.56587300 |
| C    | -3.24426000 | -0.31922600 | 1.31351500  |
| H    | -4.31154500 | -0.08073300 | 1.40362300  |
| H    | -3.09181500 | -1.32037100 | 1.73386600  |
| H    | -2.69876000 | 0.39301700  | 1.94438800  |



**Table S-13.** Geometric coordinates and thermally corrected MP2 energies for pro-Z [A(THF)<sub>3</sub>·(allyloxytrimethylsilane)]<sup>‡</sup>.

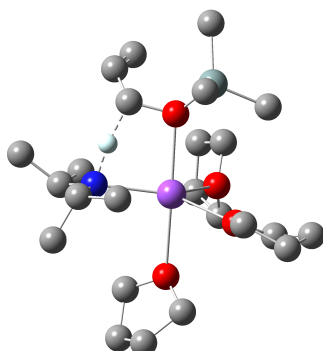

G = -1752.641904 Hartree  
G<sub>MP2</sub> = -1747.217566 Hartree

| Atom | X           | Y           | Z           |   | X           | Y           | Z           |
|------|-------------|-------------|-------------|---|-------------|-------------|-------------|
|      |             |             |             | H | -5.35713600 | 1.24844600  | -1.06323500 |
|      |             |             |             | H | -4.15263300 | 0.20894700  | -1.85192800 |
| Na   | 0.00000000  | 0.00000000  | 0.00000000  | C | -4.76940900 | -0.54208800 | 0.09594200  |
| N    | -0.21848100 | -2.08640500 | -1.19752800 | H | -5.26700100 | -1.39863100 | -0.36826200 |
| C    | -0.44656800 | -1.99564700 | -2.64421300 | H | -5.40148000 | -0.18961300 | 0.91979400  |
| C    | -1.89021300 | -2.29360100 | -3.08850400 | C | -3.36278200 | -0.89088000 | 0.59935000  |
| H    | -1.99768700 | -2.14949600 | -4.17146300 | H | -3.35188400 | -1.20441900 | 1.64939900  |
| H    | -2.59340400 | -1.61644000 | -2.58468800 | H | -2.88833800 | -1.66919200 | -0.00448000 |
| H    | -2.19502700 | -3.32096700 | -2.86402700 | O | 0.23957200  | 0.55653400  | 2.33641500  |
| C    | -0.05865800 | -0.58798700 | -3.12112900 | C | -0.79836300 | 0.54276100  | 3.32582800  |
| H    | -0.09749900 | -0.51280900 | -4.21538000 | H | -1.74900100 | 0.51888300  | 2.79124700  |
| H    | 0.95414400  | -0.32605300 | -2.79923800 | H | -0.74285900 | 1.46779500  | 3.92211700  |
| H    | -0.75541400 | 0.15751400  | -2.71034200 | C | -0.50802300 | -0.69112100 | 4.19932000  |
| H    | 0.20445300  | -2.70241200 | -3.19956900 | H | -0.79595300 | -0.52372600 | 5.24181400  |
| C    | -0.64887000 | -3.35248200 | -0.58749000 | H | -1.06459000 | -1.56011900 | 3.83576900  |
| C    | -0.01158300 | -4.62284000 | -1.19698500 | C | 1.02129400  | -0.91238400 | 4.02568400  |
| H    | -0.40095100 | -5.52549800 | -0.70839700 | H | 1.22892900  | -1.90198500 | 3.61030900  |
| H    | 1.07610800  | -4.61211800 | -1.06840000 | H | 1.56639300  | -0.82510800 | 4.97045000  |
| H    | -0.22243800 | -4.71286600 | -2.26842700 | C | 1.44266500  | 0.18529900  | 3.03058300  |
| C    | -0.36727600 | -3.31162400 | 0.92232500  | H | 1.84135300  | 1.06788400  | 3.55450600  |
| H    | -0.72939800 | -4.22434400 | 1.41281600  | H | 2.15707500  | -0.14234700 | 2.27571800  |
| H    | -0.87455800 | -2.45727900 | 1.38931700  | O | -0.14999600 | 2.41576400  | -0.57451100 |
| H    | 0.70717900  | -3.22310400 | 1.12063900  | C | -0.36183400 | 3.37531600  | 0.48704500  |
| H    | -1.74330400 | -3.46829700 | -0.69786100 | H | 0.19111100  | 3.03001700  | 1.36331000  |
| O    | -2.57029500 | 0.31521400  | 0.46885000  | H | -1.43175600 | 3.39649800  | 0.73509900  |
| C    | -3.34507700 | 1.33569900  | -0.18478900 | C | 0.10522000  | 4.72188800  | -0.06838300 |
| H    | -2.67696100 | 1.87672700  | -0.85913900 | H | -0.39973900 | 5.56831100  | 0.40697400  |
| H    | -3.73241200 | 2.04066000  | 0.56741200  | H | 1.18489100  | 4.84270400  | 0.07672200  |
| C    | -4.48956000 | 0.60489000  | -0.88711900 | C | -0.22208400 | 4.57729200  | -1.56315300 |

H 0.35566600 5.25096000 -2.20283600  
H -1.28682500 4.77044200 -1.74121700  
C 0.10825600 3.10413200 -1.81841800  
H -0.50412300 2.64604600 -2.60109000  
H 1.16454000 2.96934400 -2.08126700  
O 2.47415000 -0.38807900 -0.34402400  
C 2.50051200 -1.74984100 -0.91190000  
C 3.18188700 -2.73678300 -0.09138800  
C 3.53476700 -2.71277900 1.21413300  
H 3.43825200 -1.81945500 1.82394800  
H 3.96291100 -3.58638100 1.69700000  
H 3.34196400 -3.67569500 -0.63104100  
H 2.89783200 -1.71590100 -1.93667100  
Si 3.76682900 0.64453100 -0.65792700  
C 3.82003400 1.08537900 -2.50119500  
H 4.61091900 1.81961200 -2.70195600  
H 4.02820000 0.20434200 -3.11932100  
H 2.87152300 1.51204300 -2.84902200  
C 3.41715000 2.20455400 0.35128400  
H 3.54203700 2.02129200 1.42493300  
H 4.09581300 3.02034700 0.07242000  
H 2.38842300 2.54155400 0.18632600  
C 5.44881400 -0.06279800 -0.17585000  
H 6.24343200 0.65145900 -0.43062100  
H 5.50946000 -0.27452100 0.89631900  
H 5.65492300 -1.00107400 -0.70045100  
H 1.09010100 -2.02982600 -1.06298600

**Table S-14.** Geometric coordinates and thermally corrected MP2 energies for pro-*E* [A(THF)<sub>3</sub>·(allyloxytrimethylsilane)]<sup>‡</sup>.

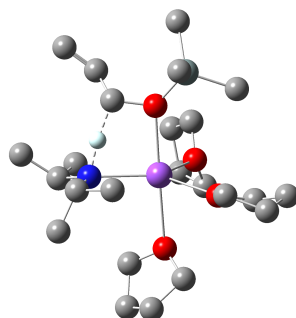

G = -1752.64151 Hartree  
 G<sub>MP2</sub> = -1747.216122 Hartree

| Atom | X           | Y           | Z           |   | X           | Y           | Z           |
|------|-------------|-------------|-------------|---|-------------|-------------|-------------|
|      |             |             |             | H | -0.98068600 | -0.23461400 | 5.26435700  |
|      |             |             |             | H | -1.21697700 | -1.37427400 | 3.93516600  |
| Na   | 0.00000000  | 0.00000000  | 0.00000000  | C | 0.86858700  | -0.72974900 | 4.13939900  |
| N    | 0.03283800  | -2.19033500 | -1.04755400 | H | 1.07379900  | -1.75541600 | 3.82144200  |
| C    | -0.18941100 | -2.21652900 | -2.49952200 | H | 1.38651500  | -0.56565400 | 5.08911400  |
| C    | -1.56252100 | -2.76623500 | -2.92427100 | C | 1.33034400  | 0.27744200  | 3.06735000  |
| H    | -1.68715900 | -2.69397200 | -4.01249400 | H | 1.72974400  | 1.19285900  | 3.53062400  |
| H    | -2.36814600 | -2.18933600 | -2.45040300 | H | 2.06140700  | -0.11304900 | 2.35861500  |
| H    | -1.69525200 | -3.81742200 | -2.64916800 | O | -0.48165200 | 2.30363300  | -0.78021700 |
| C    | -0.02390700 | -0.79314900 | -3.05362000 | C | -0.76910400 | 3.31470500  | 0.21421500  |
| H    | -0.05982000 | -0.78689100 | -4.15058400 | H | -0.16479400 | 3.10057500  | 1.09942900  |
| H    | 0.93208600  | -0.35672000 | -2.74521100 | H | -1.82966100 | 3.24105900  | 0.48888300  |
| H    | -0.83502600 | -0.14560400 | -2.68940300 | C | -0.45441100 | 4.66065200  | -0.44511300 |
| H    | 0.57190500  | -2.84040500 | -3.00976600 | H | -1.06485300 | 5.47469000  | -0.04263800 |
| C    | -0.18874000 | -3.47760100 | -0.37152500 | H | 0.59971100  | 4.92220500  | -0.29930300 |
| C    | 0.67302700  | -4.65067700 | -0.89119000 | C | -0.73153400 | 4.36616700  | -1.92777700 |
| H    | 0.43272000  | -5.57497200 | -0.34912400 | H | -0.21793800 | 5.05013200  | -2.60991600 |
| H    | 1.74050200  | -4.44176900 | -0.75445000 | H | -1.80682800 | 4.42232800  | -2.13595500 |
| H    | 0.49819700  | -4.84313200 | -1.95585100 | C | -0.23314600 | 2.92515200  | -2.05998300 |
| C    | 0.04979600  | -3.29617100 | 1.13529400  | H | -0.75368900 | 2.34602300  | -2.82798500 |
| H    | -0.15684700 | -4.22453500 | 1.68246600  | H | 0.84374600  | 2.89156100  | -2.27032100 |
| H    | -0.59799700 | -2.50996100 | 1.54312800  | O | 2.44310500  | -0.04677600 | -0.25869500 |
| H    | 1.09153400  | -3.01740700 | 1.32851000  | C | 2.66708900  | -1.42242600 | -0.79469100 |
| H    | -1.24453100 | -3.78342000 | -0.49054700 | C | 3.52737700  | -2.23219500 | 0.05696400  |
| O    | 0.15104100  | 0.60796200  | 2.31585700  | C | 4.34724400  | -3.24242100 | -0.31258900 |
| C    | -0.91526400 | 0.67930900  | 3.27178400  | H | 4.53498500  | -3.47314400 | -1.35981800 |
| H    | -1.84999900 | 0.61457300  | 2.71286100  | H | 4.82454100  | -3.88677800 | 0.42033200  |
| H    | -0.87014200 | 1.64794400  | 3.79494100  | H | 3.40472200  | -2.05213100 | 1.13044700  |
| C    | -0.66281600 | -0.48401000 | 4.24735300  | H | 3.03601400  | -1.34539600 | -1.82676800 |

|    |             |             |             |
|----|-------------|-------------|-------------|
| Si | 3.67851500  | 1.08443600  | -0.42573500 |
| C  | 4.04913800  | 1.39002900  | -2.25725300 |
| H  | 4.79387200  | 2.18683000  | -2.37942300 |
| H  | 4.44554800  | 0.49135900  | -2.74276200 |
| H  | 3.14663800  | 1.68940700  | -2.80494300 |
| C  | 3.03073200  | 2.68030100  | 0.35647000  |
| H  | 2.87644100  | 2.55997000  | 1.43535900  |
| H  | 3.73807800  | 3.50642100  | 0.21128400  |
| H  | 2.07245900  | 2.96908600  | -0.08629600 |
| C  | 5.26719300  | 0.56997300  | 0.45736000  |
| H  | 6.05711000  | 1.31470100  | 0.29283000  |
| H  | 5.11157100  | 0.48543400  | 1.54001600  |
| H  | 5.62631900  | -0.40093800 | 0.10247000  |
| O  | -2.61588800 | 0.04972200  | 0.43434400  |
| C  | -3.51430000 | 0.91264200  | -0.28276900 |
| H  | -2.90739300 | 1.55235300  | -0.92719700 |
| H  | -4.06620800 | 1.54670500  | 0.42933800  |
| C  | -4.46588700 | -0.01634500 | -1.03484400 |
| H  | -5.41434100 | 0.46607800  | -1.29120200 |
| H  | -3.99799600 | -0.37020900 | -1.96046700 |
| C  | -4.62165800 | -1.17180400 | -0.03337500 |
| H  | -4.91835500 | -2.11357300 | -0.50421700 |
| H  | -5.37646100 | -0.91962800 | 0.72090900  |
| C  | -3.22431300 | -1.25544800 | 0.59974000  |
| H  | -3.26026200 | -1.49482800 | 1.66917800  |
| H  | -2.58063700 | -1.98143500 | 0.09623100  |
| H  | 1.28652300  | -1.92152800 | -0.91004100 |

**Table S-15.** Geometric coordinates and thermally corrected MP2 energies for allyloxy-*tert*-butyldimethylsilane.

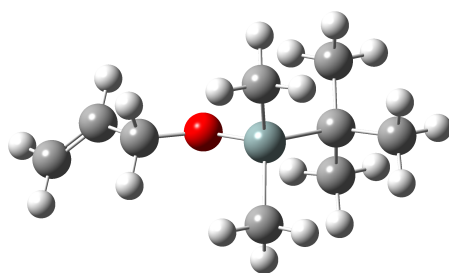

G = -719.514504 Hartree  
 $G_{\text{MP2}} = -717.4643974$  Hartree

| Atom | X           | Y           | Z           |   |            |            |             |
|------|-------------|-------------|-------------|---|------------|------------|-------------|
|      |             |             |             | C | 2.97624400 | 1.41000600 | -1.24063000 |
|      |             |             |             | H | 3.94066400 | 1.92818900 | -1.17462800 |
|      |             |             |             | H | 2.94247400 | 0.88865400 | -2.20389400 |
|      |             |             |             | H | 2.19706000 | 2.18197400 | -1.25497200 |
| C    | 0.00000000  | 0.00000000  | 0.00000000  |   |            |            |             |
| H    | -0.20510000 | 0.55381700  | 0.92820000  |   |            |            |             |
| H    | -0.04023500 | 0.72417200  | -0.83075400 |   |            |            |             |
| C    | -1.04586300 | -1.05787000 | -0.20712300 |   |            |            |             |
| H    | -0.86340500 | -1.72931000 | -1.04577900 |   |            |            |             |
| C    | -2.14006100 | -1.19236800 | 0.54070100  |   |            |            |             |
| H    | -2.33583700 | -0.54006100 | 1.38968600  |   |            |            |             |
| H    | -2.88534400 | -1.95580200 | 0.33454900  |   |            |            |             |
| O    | 1.28544400  | -0.61037600 | 0.04382700  |   |            |            |             |
| Si   | 2.74073000  | 0.21570700  | 0.20868600  |   |            |            |             |
| C    | 2.74290500  | 1.20389000  | 1.82242600  |   |            |            |             |
| H    | 3.69978600  | 1.71835700  | 1.97275400  |   |            |            |             |
| H    | 1.96104900  | 1.97338200  | 1.82008700  |   |            |            |             |
| H    | 2.56957600  | 0.55946300  | 2.69164300  |   |            |            |             |
| C    | 4.06537700  | -1.16209700 | 0.21556300  |   |            |            |             |
| C    | 3.99581400  | -1.95820200 | -1.10558600 |   |            |            |             |
| H    | 4.74338600  | -2.76498400 | -1.10508900 |   |            |            |             |
| H    | 3.01051300  | -2.41517400 | -1.24820300 |   |            |            |             |
| H    | 4.20239400  | -1.32461800 | -1.97704500 |   |            |            |             |
| C    | 5.47389400  | -0.54650200 | 0.36223800  |   |            |            |             |
| H    | 5.58435800  | 0.01514400  | 1.29837200  |   |            |            |             |
| H    | 6.23689000  | -1.33834600 | 0.36795700  |   |            |            |             |
| H    | 5.71754100  | 0.13079400  | -0.46593200 |   |            |            |             |
| C    | 3.80720500  | -2.12536200 | 1.39428900  |   |            |            |             |
| H    | 4.54724600  | -2.93912100 | 1.39181500  |   |            |            |             |
| H    | 3.88672700  | -1.61686400 | 2.36313000  |   |            |            |             |
| H    | 2.81132900  | -2.57744900 | 1.33306200  |   |            |            |             |

**Table S-16.** Geometric coordinates and thermally corrected MP2 energies for pro-Z [A(THF)<sub>2</sub>·(allyloxy-*tert*-butyldimethylsilane)]<sup>‡</sup>.

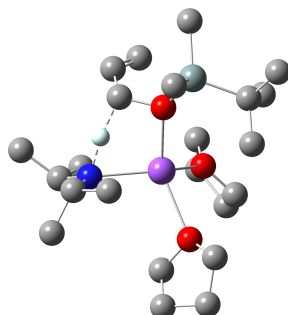

G = -1638.147241 Hartree

G<sub>MP2</sub> = -1633.055742 Hartree

| Atom | X           | Y           | Z           | Atom | X           | Y           | Z           |
|------|-------------|-------------|-------------|------|-------------|-------------|-------------|
|      |             |             |             | H    | 2.93922700  | -3.04891500 | -3.13128100 |
|      |             |             |             | H    | 2.58843100  | -1.97982400 | -4.50140400 |
| Na   | 0.00000000  | 0.00000000  | 0.00000000  | C    | 3.39631600  | -0.96208400 | -2.71056500 |
| N    | 0.93392300  | 2.17820300  | -0.00532400 | H    | 3.25417600  | 0.00390700  | -3.20845900 |
| C    | 1.04559600  | 2.98232500  | -1.22862900 | H    | 4.46857700  | -1.17769600 | -2.68475100 |
| C    | 2.48784300  | 3.21856200  | -1.71380400 | C    | 2.77261000  | -0.93683900 | -1.31490200 |
| H    | 2.48723500  | 3.76248700  | -2.66708600 | H    | 3.23881500  | -1.68035300 | -0.65311400 |
| H    | 3.00578400  | 2.26226800  | -1.86867400 | H    | 2.80192200  | 0.04421500  | -0.83222000 |
| H    | 3.07868100  | 3.80606800  | -1.00359800 | O    | 0.02523500  | -1.83441000 | 1.48399700  |
| C    | 0.24185000  | 2.30265200  | -2.34750700 | C    | 0.53971800  | -3.14192700 | 1.18923400  |
| H    | 0.21901400  | 2.92219600  | -3.25298700 | H    | 1.03775100  | -3.07932400 | 0.22061200  |
| H    | -0.79026400 | 2.11719100  | -2.03618500 | H    | -0.29933200 | -3.85007600 | 1.11714600  |
| H    | 0.69716100  | 1.33686700  | -2.60831600 | C    | 1.46673200  | -3.50078000 | 2.37088300  |
| H    | 0.59719100  | 3.98828200  | -1.08994500 | H    | 1.35398400  | -4.55118100 | 2.65584200  |
| C    | 1.75867800  | 2.64938900  | 1.11564200  | H    | 2.51773100  | -3.34164700 | 2.11161600  |
| C    | 1.42115000  | 4.07324100  | 1.61410600  | C    | 1.02107800  | -2.52952700 | 3.49981500  |
| H    | 2.09741400  | 4.37744900  | 2.42366000  | H    | 1.80895900  | -1.80173500 | 3.71583500  |
| H    | 0.39483900  | 4.11956300  | 1.99603700  | H    | 0.77928900  | -3.04652700 | 4.43309200  |
| H    | 1.51245000  | 4.81510800  | 0.81285600  | C    | -0.20463700 | -1.82253800 | 2.90373400  |
| C    | 1.65726300  | 1.65360700  | 2.28134600  | H    | -1.13071100 | -2.37544500 | 3.12219100  |
| H    | 2.28897200  | 1.96548600  | 3.12259200  | H    | -0.33562800 | -0.78391600 | 3.21075400  |
| H    | 1.99098100  | 0.65447700  | 1.96748000  | O    | -2.13998400 | 0.89443400  | -0.03770200 |
| H    | 0.62568100  | 1.57687800  | 2.64692000  | C    | -1.77236700 | 2.17500800  | 0.59899200  |
| H    | 2.82085400  | 2.66226700  | 0.81479300  | C    | -2.06169100 | 2.22058700  | 2.02365000  |
| O    | 1.37939500  | -1.29348900 | -1.49961700 | C    | -2.34251800 | 1.21455800  | 2.88297500  |
| C    | 1.17437600  | -1.81637700 | -2.83138000 | H    | -2.51443900 | 0.19925000  | 2.53764500  |
| H    | 0.61656200  | -1.07549200 | -3.41845200 | H    | -2.45655800 | 1.39825300  | 3.94755200  |
| H    | 0.57067600  | -2.72622700 | -2.75498000 | H    | -1.93463500 | 3.22249200  | 2.44468800  |
| C    | 2.57178600  | -2.05411100 | -3.41007200 | H    | -2.22033300 | 3.01087800  | 0.04493400  |

Si -3.67931500 0.66915200 -0.69128500  
C -3.87274100 1.76482200 -2.22528200  
H -4.85737300 1.63345700 -2.69066900  
H -3.78045500 2.82405200 -1.95717500  
H -3.11103500 1.55232700 -2.98400800  
C -3.78690600 -1.18952000 -1.17656800  
C -2.74058800 -1.53750300 -2.25540200  
H -1.71634100 -1.35961000 -1.90555600  
H -2.81114000 -2.60052500 -2.53273600  
H -2.88311600 -0.95105100 -3.17116200  
C -5.19328200 -1.48999800 -1.74083400  
H -5.27339000 -2.54958700 -2.02571800  
H -5.98102500 -1.29090700 -1.00467400  
H -5.41515300 -0.89571600 -2.63600600  
C -3.54647600 -2.07982900 0.06162300  
H -4.28098300 -1.88333900 0.85199900  
H -3.63503700 -3.14348500 -0.20865200  
H -2.54897100 -1.92585100 0.48958400  
C -5.04893200 1.12083900 0.52851500  
H -6.03171800 1.08621100 0.04175500  
H -5.06939600 0.45529100 1.39687900  
H -4.89790600 2.13639000 0.90919600  
H -0.35182400 2.27426800 0.35090600

**Table S-17.** Geometric coordinates and thermally corrected MP2 energies for IRC of pro-Z [A(THF)<sub>2</sub>·(allyloxy-*tert*-butyldimethylsilane)]<sup>‡</sup>.

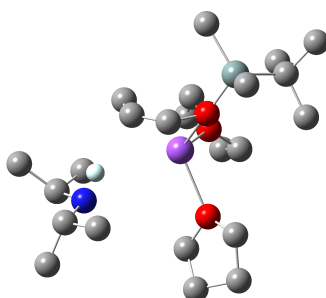

G = -1638.162218 Hartree  
G<sub>MP2</sub> = -1633.063992 Hartree

| Atom | X           | Y           | Z           |   | X           | Y           | Z           |
|------|-------------|-------------|-------------|---|-------------|-------------|-------------|
|      |             |             |             | H | 0.81408400  | 1.30226500  | 4.88539500  |
|      |             |             |             | H | 0.97677900  | -0.40471100 | 5.33734500  |
| Na   | 0.00000000  | 0.00000000  | 0.00000000  | C | 2.41705600  | 0.29401400  | 3.80954500  |
| N    | 3.36272100  | -0.93377000 | -0.53662500 | H | 2.78973100  | -0.73220800 | 3.71233400  |
| C    | 3.86728400  | -2.23563900 | -0.06200000 | H | 3.17409100  | 0.88051600  | 4.33879300  |
| C    | 5.24250600  | -2.09800200 | 0.60249700  | C | 2.08753700  | 0.87507200  | 2.43263800  |
| H    | 5.54401600  | -3.05370800 | 1.04611200  | H | 2.14468700  | 1.97273900  | 2.44015600  |
| H    | 5.20712000  | -1.34420900 | 1.39883000  | H | 2.71140500  | 0.48431600  | 1.62240300  |
| H    | 6.02404100  | -1.80570100 | -0.10659400 | O | -0.42207000 | 2.24632700  | -0.47570100 |
| C    | 2.85584100  | -2.82462400 | 0.92866400  | C | -0.48686100 | 3.36964600  | 0.41340900  |
| H    | 3.14749800  | -3.84137800 | 1.21750800  | H | -0.14553700 | 3.02434200  | 1.39156900  |
| H    | 1.84868200  | -2.86739300 | 0.49993200  | H | -1.53134500 | 3.70344700  | 0.49855300  |
| H    | 2.80896700  | -2.21186600 | 1.83728500  | C | 0.39726500  | 4.46385500  | -0.22599400 |
| H    | 3.97103300  | -2.95667400 | -0.89362700 | H | -0.07877700 | 5.44628400  | -0.15219100 |
| C    | 4.19014300  | -0.21770700 | -1.52835300 | H | 1.36866100  | 4.53092600  | 0.27255600  |
| C    | 4.42928600  | -0.99399500 | -2.83712200 | C | 0.56170700  | 3.99763600  | -1.69962900 |
| H    | 5.05146600  | -0.41163300 | -3.52790600 | H | 1.59286100  | 3.68733300  | -1.89150100 |
| H    | 3.47533900  | -1.20578900 | -3.33551800 | H | 0.30637200  | 4.77876400  | -2.42179800 |
| H    | 4.93810800  | -1.94804800 | -2.66118200 | C | -0.38071500 | 2.78975500  | -1.80412400 |
| C    | 3.52916800  | 1.13494500  | -1.81881000 | H | -1.39473600 | 3.09468800  | -2.10356700 |
| H    | 4.12404800  | 1.71783600  | -2.53217300 | H | -0.03456000 | 1.99455900  | -2.46732900 |
| H    | 3.42205100  | 1.71691500  | -0.89635600 | O | -1.94331000 | -1.33467200 | -0.03660300 |
| H    | 2.53057800  | 0.97964500  | -2.24527800 | C | -1.08554900 | -2.43441200 | -0.38043000 |
| H    | 5.16429100  | -0.02169000 | -1.06239300 | C | -0.15051800 | -2.29414200 | -1.36899800 |
| O    | 0.71294700  | 0.49318500  | 2.16314200  | C | 0.16882300  | -1.16930600 | -2.18959500 |
| C    | 0.10805900  | -0.06388100 | 3.35165300  | H | -0.65200700 | -0.48332200 | -2.42271700 |
| H    | 0.02129200  | -1.15145100 | 3.22948900  | H | 0.79522100  | -1.37322800 | -3.05688300 |
| H    | -0.89772000 | 0.35546900  | 3.45325200  | H | 0.50119500  | -3.16793000 | -1.46055400 |
| C    | 1.04605900  | 0.30062700  | 4.50385100  | H | -1.16778300 | -3.28938800 | 0.28148000  |



Si -3.58715300 -1.52646400 -0.39027000  
C -4.23676300 -3.07017200 0.49119700  
H -5.30478900 -3.22565300 0.29745800  
H -3.70554600 -3.96110800 0.13816100  
H -4.09822300 -3.00992500 1.57713000  
C -4.45029500 0.04875000 0.29253600  
C -4.09139600 0.24805500 1.78019600  
H -3.01089500 0.37139900 1.91907100  
H -4.58667700 1.14600100 2.18000400  
H -4.41016600 -0.60141100 2.39682500  
C -5.98201200 -0.10123700 0.16287900  
H -6.48826400 0.80277400 0.53310500  
H -6.29445900 -0.24281700 -0.87945200  
H -6.36403700 -0.94867500 0.74469000  
C -4.00840700 1.29761200 -0.50027200  
H -4.28191400 1.22426700 -1.55996200  
H -4.50126900 2.19708700 -0.09975300  
H -2.92566800 1.45889300 -0.44427000  
C -3.83991100 -1.71803600 -2.24982000  
H -4.88045200 -1.95912000 -2.49977200  
H -3.55801500 -0.81325200 -2.79870800  
H -3.20511500 -2.53270500 -2.61500000  
H 2.44081500 -1.08079400 -0.96824800

**Table S-18.** Geometric coordinates and thermally corrected MP2 energies for pro-*E* [A(THF)<sub>2</sub>·(allyloxy-*tert*-butyldimethylsilane)]<sup>‡</sup>.

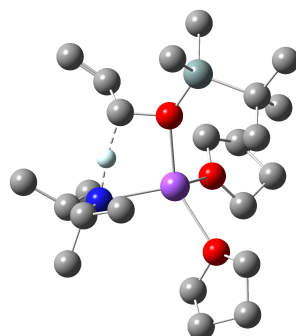

G = -1638.147473 Hartree  
G<sub>MP2</sub> = -1633.054489 Hartree

| Atom | X           | Y           | Z           | Atom | X           | Y           | Z           |
|------|-------------|-------------|-------------|------|-------------|-------------|-------------|
|      |             |             |             | H    | 2.87101300  | -4.08356700 | -1.63155900 |
|      |             |             |             | H    | 2.87007600  | -3.37974600 | -3.25826100 |
| Na   | 0.00000000  | 0.00000000  | 0.00000000  | C    | 3.56659900  | -2.02154700 | -1.65674700 |
| N    | 1.15685700  | 2.04165700  | -0.21493200 | H    | 3.63616900  | -1.20796100 | -2.38778800 |
| C    | 1.58614600  | 2.49530000  | -1.54376200 | H    | 4.58183500  | -2.33695500 | -1.39858000 |
| C    | 3.11026600  | 2.47569400  | -1.76085800 | C    | 2.76694100  | -1.56891600 | -0.43546900 |
| H    | 3.35615300  | 2.75926200  | -2.79228600 | H    | 3.00755600  | -2.17571100 | 0.44879900  |
| H    | 3.51217000  | 1.46941900  | -1.57910600 | H    | 2.89017700  | -0.51043800 | -0.18902200 |
| H    | 3.63618400  | 3.16955100  | -1.09724100 | O    | -0.44470600 | -1.19871100 | 1.96518000  |
| C    | 0.91334500  | 1.61967500  | -2.61296200 | C    | 0.13880900  | -2.44964300 | 2.36753400  |
| H    | 1.12964700  | 1.99083800  | -3.62269700 | H    | 1.08012700  | -2.26547900 | 2.90785000  |
| H    | -0.17380800 | 1.60078500  | -2.48602600 | H    | 0.36051000  | -3.01380600 | 1.45873200  |
| H    | 1.28451900  | 0.58644900  | -2.54858400 | C    | -0.90231200 | -3.08931400 | 3.28231300  |
| H    | 1.25535700  | 3.53546800  | -1.73872900 | H    | -1.69642500 | -3.55045100 | 2.68382800  |
| C    | 1.79085500  | 2.74548900  | 0.90978600  | H    | -0.47795100 | -3.85335100 | 3.94070900  |
| C    | 1.53011200  | 4.26777600  | 0.95165800  | C    | -1.43529600 | -1.86199700 | 4.04118000  |
| H    | 2.06105200  | 4.73088600  | 1.79388600  | H    | -0.77897000 | -1.62602700 | 4.88641400  |
| H    | 0.45951100  | 4.47563700  | 1.06739000  | H    | -2.44639100 | -2.00414100 | 4.43329100  |
| H    | 1.87515000  | 4.76268200  | 0.03668800  | C    | -1.37333100 | -0.74667400 | 2.98206000  |
| C    | 1.33002500  | 2.10954500  | 2.23026500  | H    | -2.33715800 | -0.57783800 | 2.49164700  |
| H    | 1.82722100  | 2.57953000  | 3.08796200  | H    | -1.01761800 | 0.20525500  | 3.38933900  |
| H    | 1.56000600  | 1.03605700  | 2.25255600  | O    | -2.03177400 | 0.96590200  | -0.49066900 |
| H    | 0.24899400  | 2.23601100  | 2.36414800  | C    | -1.59707700 | 2.37416600  | -0.22308700 |
| H    | 2.88509200  | 2.60783500  | 0.86228600  | C    | -2.20406600 | 2.93327700  | 0.98088500  |
| O    | 1.37557100  | -1.78082600 | -0.78033300 | C    | -2.52109200 | 4.22518900  | 1.21761500  |
| C    | 1.27897500  | -2.63562300 | -1.94270700 | H    | -2.45682900 | 4.98178000  | 0.43766500  |
| H    | 0.91236000  | -2.03793700 | -2.78689900 | H    | -2.81807800 | 4.56875900  | 2.20459200  |
| H    | 0.54989700  | -3.42514100 | -1.73372100 | H    | -2.31045900 | 2.22731800  | 1.81119800  |
| C    | 2.69365600  | -3.16324700 | -2.20056600 | H    | -1.80203800 | 2.97377500  | -1.11934500 |

Si -3.58669300 0.65335700 -1.06617200  
C -3.94583700 1.73079200 -2.57956900  
H -4.91988800 1.48617800 -3.01998900  
H -3.96773900 2.79094900 -2.30428000  
H -3.18402100 1.60787200 -3.35832400  
C -3.60986000 -1.21005400 -1.55623800  
C -2.53309400 -1.49758400 -2.62294400  
H -1.52547600 -1.25720400 -2.26354800  
H -2.54080500 -2.56177700 -2.90448300  
H -2.69936300 -0.91688200 -3.53833000  
C -4.99173700 -1.57734000 -2.14123500  
H -5.02048900 -2.64183600 -2.41815300  
H -5.80183800 -1.40827500 -1.42135900  
H -5.22275600 -1.00118300 -3.04526100  
C -3.35002500 -2.10076600 -0.32240300  
H -4.12843500 -1.97174500 0.43979000  
H -3.35047200 -3.16392800 -0.60913600  
H -2.38465800 -1.88637800 0.15189400  
C -4.89784700 0.99862000 0.25320600  
H -5.91031600 0.84313700 -0.13997700  
H -4.77929200 0.35474300 1.13290000  
H -4.82149900 2.03692600 0.59270100  
H -0.12961200 2.28374600 -0.16058100

**Table S-19.** Geometric coordinates and thermally corrected MP2 energies for pro-Z  
[A(THF)<sub>3</sub>·(allyloxy-*tert*-butyldimethylsilane)]<sup>‡</sup>.

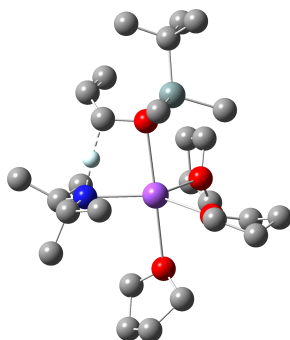

G = -1870.485032 Hartree  
G<sub>MP2</sub> = -1864.62615 Hartree

| Atom | X           | Y           | Z           |   | X           | Y           | Z           |
|------|-------------|-------------|-------------|---|-------------|-------------|-------------|
|      |             |             |             | H | -0.85056900 | -0.46894200 | 5.23748000  |
|      |             |             |             | H | -1.09959200 | -1.55350300 | 3.86478900  |
| Na   | 0.00000000  | 0.00000000  | 0.00000000  | C | 0.98066400  | -0.88582800 | 4.05320600  |
| N    | -0.22669800 | -2.06796000 | -1.20570800 | H | 1.19515900  | -1.87591000 | 3.64244500  |
| C    | -0.42094400 | -1.98669100 | -2.65846700 | H | 1.51296400  | -0.79515200 | 5.00487400  |
| C    | -1.85971700 | -2.25647200 | -3.13636600 | C | 1.41150700  | 0.20887700  | 3.06038800  |
| H    | -1.93771600 | -2.10788600 | -4.22118600 | H | 1.77356200  | 1.10541300  | 3.58739700  |
| H    | -2.56197400 | -1.56711300 | -2.64817500 | H | 2.15814000  | -0.10857100 | 2.33235600  |
| H    | -2.18924800 | -3.27833600 | -2.92276000 | O | -0.10688200 | 2.43050300  | -0.54664300 |
| C    | 0.00918200  | -0.59318000 | -3.13703300 | C | -0.28779900 | 3.39142900  | 0.52078300  |
| H    | -0.00555700 | -0.52312900 | -4.23219000 | H | 0.27294700  | 3.03635500  | 1.38790100  |
| H    | 1.02182100  | -0.35769900 | -2.79697600 | H | -1.35341700 | 3.42644300  | 0.78459400  |
| H    | -0.67668900 | 0.17125700  | -2.74284300 | C | 0.19051100  | 4.73243000  | -0.03868100 |
| H    | 0.22687800  | -2.71316800 | -3.19187900 | H | -0.29851500 | 5.58448400  | 0.44313400  |
| C    | -0.73031100 | -3.30679200 | -0.59455100 | H | 1.27306100  | 4.83879100  | 0.09490600  |
| C    | -0.12348800 | -4.61189600 | -1.16012900 | C | -0.15427900 | 4.59453600  | -1.53021100 |
| H    | -0.57837400 | -5.49001000 | -0.68349300 | H | 0.42506700  | 5.26216400  | -2.17474300 |
| H    | 0.95540000  | -4.65085800 | -0.97819600 | H | -1.21844700 | 4.80040000  | -1.69731800 |
| H    | -0.28594000 | -4.70341500 | -2.23984400 | C | 0.15643900  | 3.11856300  | -1.79040600 |
| C    | -0.51812100 | -3.25861000 | 0.92603700  | H | -0.46440100 | 2.66893100  | -2.57126300 |
| H    | -0.94126800 | -4.15008100 | 1.40678900  | H | 1.21019200  | 2.97178600  | -2.05639500 |
| H    | -1.01084500 | -2.37950700 | 1.36226500  | O | 2.58521300  | -0.49011300 | -0.26933800 |
| H    | 0.54846500  | -3.21456400 | 1.17473700  | C | 2.50901300  | -1.84018200 | -0.85300000 |
| H    | -1.82240400 | -3.37894900 | -0.75254100 | C | 3.05587000  | -2.89236900 | -0.01641400 |
| O    | 0.22166700  | 0.54629600  | 2.32668200  | C | 3.29923300  | -2.92384900 | 1.31497200  |
| C    | -0.84231100 | 0.53522000  | 3.28938700  | H | 3.19239300  | -2.04270800 | 1.93964600  |
| H    | -1.77809800 | 0.47845100  | 2.73133100  | H | 3.62180400  | -3.83612200 | 1.80821100  |
| H    | -0.82138000 | 1.47680100  | 3.86116500  | H | 3.19037400  | -3.82796300 | -0.56809800 |
| C    | -0.55188800 | -0.66935700 | 4.20390200  | H | 2.95050900  | -1.83650800 | -1.85872400 |

Si 3.81981900 0.58642700 -0.67693100  
C 3.70754700 0.98177200 -2.53171100  
H 4.39896900 1.78489100 -2.81314400  
H 3.94303200 0.11211100 -3.15554300  
H 2.69507300 1.30609500 -2.79840800  
C 3.39395700 2.14630000 0.30842500  
H 3.56298700 2.00807200 1.38231500  
H 3.98828800 3.00905800 -0.01490200  
H 2.33558100 2.38673200 0.16583400  
C 5.63463400 0.05620200 -0.27866900  
C 5.83215800 -0.20379400 1.22952400  
H 5.23316600 -1.05346300 1.57012300  
H 6.88767300 -0.43532700 1.43778900  
H 5.56935000 0.67170900 1.83741400  
C 6.56551200 1.22123700 -0.69600900  
H 7.60979200 0.96242300 -0.46766400  
H 6.51418800 1.43235800 -1.77088400  
H 6.33938100 2.15080800 -0.15876300  
C 6.05747400 -1.20600400 -1.06058500  
H 5.47576300 -2.08006800 -0.75451100  
H 5.94198400 -1.07771400 -2.14419100  
H 7.11921000 -1.42720100 -0.87225400  
O -2.60192100 0.37804500 0.38193300  
C -3.33298500 1.45353500 -0.22547700  
H -2.61320900 2.06812500 -0.76975300  
H -3.81120900 2.07038700 0.55272100  
C -4.38269800 0.78105700 -1.10735900  
H -5.22884900 1.43627900 -1.33708700  
H -3.93026800 0.45729500 -2.05149900  
C -4.77106500 -0.43347600 -0.24791700  
H -5.16791400 -1.26599500 -0.83600000  
H -5.53345800 -0.14879400 0.48649600  
C -3.44790300 -0.79633100 0.45082300  
H -3.59410600 -1.06976900 1.50294400  
H -2.91727300 -1.60733800 -0.05252800  
H 1.08721900 -2.04639600 -1.04236700

**Table S-20.** Geometric coordinates and thermally corrected MP2 energies for pro-*E* [A(THF)<sub>3</sub>·(allyloxy-*tert*-butyldimethylsilane)]<sup>‡</sup>.

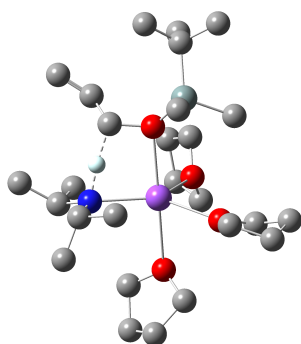

G = -1870.484508 Hartree  
G<sub>MP2</sub> = -1864.62501 Hartree

| Atom | X           | Y           | Z           |   | X           | Y           | Z           |
|------|-------------|-------------|-------------|---|-------------|-------------|-------------|
|      |             |             |             | H | -0.74408900 | -0.02360400 | 5.32113800  |
|      |             |             |             | H | -1.17031200 | -1.21378200 | 4.08838900  |
| Na   | 0.00000000  | 0.00000000  | 0.00000000  | C | 0.97052200  | -0.73344300 | 4.10449000  |
| N    | -0.20162000 | -2.14573100 | -1.07431100 | H | 1.06388000  | -1.76484500 | 3.75337000  |
| C    | -0.40993100 | -2.15307700 | -2.52796400 | H | 1.55390100  | -0.64040800 | 5.02536000  |
| C    | -1.85352700 | -2.46050700 | -2.96474400 | C | 1.45624600  | 0.24863700  | 3.02414700  |
| H    | -1.95092000 | -2.38139600 | -4.05522100 | H | 1.89589900  | 1.15094400  | 3.47718700  |
| H    | -2.55133400 | -1.74516500 | -2.50822300 | H | 2.16033600  | -0.17123200 | 2.30540100  |
| H    | -2.17299100 | -3.46879400 | -2.68177000 | O | -0.26186300 | 2.36685400  | -0.73986800 |
| C    | 0.00580800  | -0.78896600 | -3.09744500 | C | -0.46205400 | 3.38603000  | 0.26709600  |
| H    | -0.01943700 | -0.79146400 | -4.19456800 | H | 0.10445200  | 3.09312700  | 1.15422800  |
| H    | 1.01959400  | -0.52199300 | -2.78323000 | H | -1.52871000 | 3.42102900  | 0.52686300  |
| H    | -0.68303600 | -0.00473600 | -2.75030700 | C | -0.00144200 | 4.69806000  | -0.36958900 |
| H    | 0.23611600  | -2.90719300 | -3.02080200 | H | -0.50076900 | 5.57044500  | 0.06278000  |
| C    | -0.64064500 | -3.37265800 | -0.39118400 | H | 1.07958600  | 4.82459700  | -0.24388800 |
| C    | 0.02167500  | -4.67753000 | -0.88802200 | C | -0.34692800 | 4.47015200  | -1.84965600 |
| H    | -0.38114800 | -5.54388900 | -0.34672100 | H | 0.22703700  | 5.10321600  | -2.53265600 |
| H    | 1.10610000  | -4.65039200 | -0.72933200 | H | -1.41245900 | 4.65929400  | -2.02678200 |
| H    | -0.16281300 | -4.84660800 | -1.95492700 | C | -0.02726200 | 2.98277800  | -2.02711400 |
| C    | -0.40404900 | -3.22388200 | 1.11983500  | H | -0.65872200 | 2.48454300  | -2.76893400 |
| H    | -0.78223500 | -4.09833000 | 1.66427600  | H | 1.02262400  | 2.82564400  | -2.30312100 |
| H    | -0.91258600 | -2.33487600 | 1.51374800  | O | 2.51881500  | -0.37616200 | -0.27180000 |
| H    | 0.66532500  | -3.13226900 | 1.33690600  | C | 2.51822000  | -1.78499500 | -0.75428700 |
| H    | -1.72991400 | -3.50194100 | -0.52739100 | C | 3.15118700  | -2.70199000 | 0.18067200  |
| O    | 0.27416200  | 0.61823700  | 2.29480900  | C | 3.77807400  | -3.86980100 | -0.09360200 |
| C    | -0.75736800 | 0.77402200  | 3.27944900  | H | 3.98293700  | -4.18254000 | -1.11597800 |
| H    | -1.71140100 | 0.72995200  | 2.75209700  | H | 4.07106800  | -4.55881200 | 0.69349600  |
| H    | -0.65396400 | 1.76115900  | 3.75729900  | H | 2.99060300  | -2.45529400 | 1.23528700  |
| C    | -0.52529600 | -0.35637200 | 4.30182800  | H | 2.95474500  | -1.82350600 | -1.76144300 |

Si 3.76950400 0.69024500 -0.64303800  
C 3.86500700 0.92204500 -2.52354400  
H 4.64224100 1.64358300 -2.80358000  
H 4.08563600 -0.01748000 -3.04183800  
H 2.90967700 1.29383100 -2.91440400  
C 3.21183100 2.32080700 0.14442600  
H 3.33046900 2.31543800 1.23440400  
H 3.77406500 3.17661300 -0.24749800  
H 2.15105500 2.47656100 -0.07368800  
C 5.51735800 0.23450000 0.03445500  
C 5.44168900 -0.18888000 1.51624000  
H 4.88454600 -1.12247400 1.63617100  
H 6.45281400 -0.35140600 1.91884200  
H 4.96489100 0.57841300 2.14072600  
C 6.40713700 1.49732300 -0.06787000  
H 7.42473600 1.26577200 0.27962100  
H 6.49530700 1.86328900 -1.09878000  
H 6.03306900 2.32249400 0.54989500  
C 6.18764700 -0.89537700 -0.77735300  
H 5.63392000 -1.83685800 -0.70471500  
H 6.28563600 -0.63249400 -1.83800500  
H 7.20367200 -1.07953000 -0.39581200  
O -2.61978600 0.30906400 0.50089300  
C -3.39371800 1.27980000 -0.22765900  
H -2.72322600 1.77413500 -0.93426600  
H -3.78631700 2.03367400 0.47248300  
C -4.53342200 0.50075700 -0.88411300  
H -5.40299400 1.12825900 -1.10299100  
H -4.19292000 0.04468400 -1.82078900  
C -4.81030800 -0.58248900 0.16933300  
H -5.30953100 -1.46654700 -0.23803600  
H -5.43799200 -0.17893200 0.97295100  
C -3.40107300 -0.89713000 0.68529400  
H -3.38407700 -1.16400600 1.74792400  
H -2.92418900 -1.69869000 0.11391000  
H 1.07936400 -2.06226400 -0.91498600

**Table S-21.** Geometric coordinates and thermally corrected MP2 energies for allyloxytriisopropylsilane.

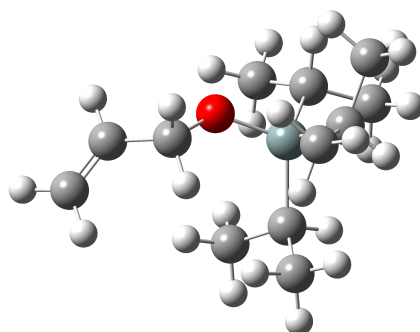

G = -837.366923 Hartree  
 $G_{\text{MP2}}$  = -834.8750592 Hartree

| Atom | X           | Y           | Z           |   | X           | Y           | Z           |
|------|-------------|-------------|-------------|---|-------------|-------------|-------------|
|      |             |             |             | H | 1.23077200  | -3.32090700 | 2.18684600  |
|      |             |             |             | H | 0.68332100  | -2.73392900 | 3.76259500  |
|      |             |             |             | H | -0.02621600 | -2.09044200 | 2.27403800  |
| C    | 0.00000000  | 0.00000000  | 0.00000000  | C | 3.47109300  | 0.85823300  | 0.98917700  |
| H    | -0.14497500 | 0.40850000  | 1.00933000  | H | 4.08028200  | 0.83759000  | 1.90788800  |
| H    | 0.04571700  | 0.85558200  | -0.69123900 | C | 4.43402100  | 1.03913600  | -0.20167300 |
| C    | -1.16098100 | -0.88232700 | -0.36627100 | H | 4.94281300  | 2.01129600  | -0.14498300 |
| H    | -1.03415900 | -1.44960500 | -1.28801500 | H | 5.20863000  | 0.26629100  | -0.23529400 |
| C    | -2.28862300 | -0.97906500 | 0.33789900  | H | 3.89611300  | 1.01110600  | -1.15785400 |
| H    | -2.43453400 | -0.42527300 | 1.26363400  | C | 2.54178000  | 2.08773600  | 1.07786700  |
| H    | -3.11425200 | -1.60765600 | 0.01543100  | H | 3.12878800  | 3.00900300  | 1.19499000  |
| O    | 1.21846000  | -0.72650100 | -0.11490300 | H | 1.95119500  | 2.19907500  | 0.16063100  |
| Si   | 2.52198800  | -0.81371000 | 0.94471300  | H | 1.84228000  | 2.03787100  | 1.91864600  |
| C    | 3.62804500  | -2.15119100 | 0.14728700  |   |             |             |             |
| H    | 3.98183300  | -1.67897200 | -0.78182000 |   |             |             |             |
| C    | 4.86992400  | -2.49269500 | 0.99494500  |   |             |             |             |
| H    | 4.59042300  | -2.99908800 | 1.92765800  |   |             |             |             |
| H    | 5.54093200  | -3.17105600 | 0.45092700  |   |             |             |             |
| H    | 5.45487600  | -1.60510300 | 1.26636000  |   |             |             |             |
| C    | 2.88166200  | -3.43391900 | -0.26585200 |   |             |             |             |
| H    | 1.98192200  | -3.20865500 | -0.84633400 |   |             |             |             |
| H    | 3.52866800  | -4.07851700 | -0.87689600 |   |             |             |             |
| H    | 2.57772300  | -4.02411800 | 0.60700000  |   |             |             |             |
| C    | 1.98258100  | -1.31814600 | 2.71929200  |   |             |             |             |
| H    | 2.90159600  | -1.74615800 | 3.15382300  |   |             |             |             |
| C    | 1.55871300  | -0.16201700 | 3.64706300  |   |             |             |             |
| H    | 0.63521300  | 0.32047400  | 3.30269000  |   |             |             |             |
| H    | 1.36279200  | -0.53448100 | 4.66198600  |   |             |             |             |
| H    | 2.32858200  | 0.61268700  | 3.72530300  |   |             |             |             |
| C    | 0.91059600  | -2.42756800 | 2.73202300  |   |             |             |             |



**Table S-22.** Geometric coordinates and thermally corrected MP2 energies for pro-Z  $\mu$ -allyl [A(THF)<sub>3</sub>·(allyloxytriisopropylsilane)]<sup>‡</sup>.

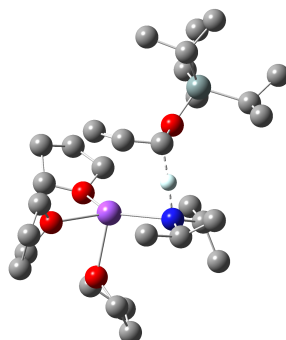

G = -1988.359903 Hartree

G<sub>MP2</sub> = -1982.055175 Hartree

| Atom | X           | Y           | Z           |   | X           | Y           | Z           |
|------|-------------|-------------|-------------|---|-------------|-------------|-------------|
|      |             |             |             | H | 2.94910200  | 0.85932800  | -4.41856600 |
|      |             |             |             | H | 1.36900600  | 1.31231100  | -3.74517000 |
| Na   | 0.00000000  | 0.00000000  | 0.00000000  | C | 3.04318500  | 2.16922400  | -2.63912700 |
| N    | -1.06450500 | 2.18843700  | -0.07206800 | H | 2.70494600  | 3.16897100  | -2.92613100 |
| C    | -1.65303500 | 2.67678500  | -1.32825800 | H | 4.13422600  | 2.14524400  | -2.73835700 |
| C    | -0.80782200 | 3.71822400  | -2.08673100 | C | 2.61911800  | 1.80513300  | -1.20039100 |
| H    | -1.29845800 | 3.99002300  | -3.03004100 | H | 3.46086000  | 1.85773000  | -0.49772900 |
| H    | 0.18347200  | 3.31266400  | -2.32865000 | H | 1.80429400  | 2.42941200  | -0.82496400 |
| H    | -0.66282700 | 4.64296900  | -1.51842000 | O | 1.52787900  | -0.92269000 | 1.68086600  |
| C    | -1.92227200 | 1.48061000  | -2.25011600 | C | 2.93640900  | -1.13898900 | 1.51649400  |
| H    | -2.45682400 | 1.79215000  | -3.15711100 | H | 3.20898000  | -0.73148800 | 0.54305000  |
| H    | -2.53238200 | 0.73415200  | -1.73349500 | H | 3.14170400  | -2.22140200 | 1.52912600  |
| H    | -0.97554900 | 1.01641900  | -2.56388600 | C | 3.59788600  | -0.44256500 | 2.72031800  |
| H    | -2.63692400 | 3.15525400  | -1.14603200 | H | 4.48781200  | -0.98215200 | 3.05819400  |
| C    | -0.63768300 | 3.25622500  | 0.84362800  | H | 3.90704200  | 0.57365300  | 2.45762800  |
| C    | -1.76423500 | 4.20514300  | 1.31608000  | C | 2.47156200  | -0.41348400 | 3.79170500  |
| H    | -1.36478800 | 4.99794300  | 1.96238000  | H | 2.22941500  | 0.61579200  | 4.07115600  |
| H    | -2.52445600 | 3.65683500  | 1.88451500  | H | 2.74582100  | -0.94961100 | 4.70516400  |
| H    | -2.26671800 | 4.69056500  | 0.47250100  | C | 1.27647400  | -1.08059400 | 3.08410800  |
| C    | 0.05795600  | 2.64172800  | 2.06832800  | H | 1.22088600  | -2.15326500 | 3.32485900  |
| H    | 0.43418900  | 3.42310300  | 2.74073600  | H | 0.31076800  | -0.62238800 | 3.29971700  |
| H    | 0.90864600  | 2.01692100  | 1.76703400  | O | -0.18652800 | -1.94592500 | -1.43218200 |
| H    | -0.63525300 | 2.01546200  | 2.64198500  | C | 0.32567900  | -3.17790300 | -0.87629000 |
| H    | 0.11993900  | 3.89403000  | 0.35205800  | H | 0.57976000  | -2.99525400 | 0.17145600  |
| O    | 2.11918100  | 0.44757800  | -1.24252000 | H | 1.23997600  | -3.45538500 | -1.42026800 |
| C    | 2.42403900  | -0.12520600 | -2.52471100 | C | -0.77791200 | -4.21982500 | -1.07066100 |
| H    | 1.67044900  | -0.89095400 | -2.71793300 | H | -0.38340600 | -5.23790800 | -1.14472300 |
| H    | 3.41989900  | -0.59649600 | -2.49833900 | H | -1.48360600 | -4.18425400 | -0.23384500 |
| C    | 2.40340200  | 1.05691900  | -3.49061000 | C | -1.45360400 | -3.73174900 | -2.36148000 |

H -2.48094000 -4.09027300 -2.47448200  
H -0.88197700 -4.05599200 -3.23953500  
C -1.38499500 -2.21103700 -2.20254800  
H -1.30417300 -1.67547200 -3.15323500  
H -2.24660400 -1.81855800 -1.65130500  
C -3.07793300 0.70374900 1.16163000  
C -2.36632900 -0.30758700 1.91810500  
C -2.09337600 -1.59453100 1.57490800  
H -2.56586900 -2.05034300 0.71006800  
H -1.47938600 -2.23336500 2.20365500  
H -1.90498700 0.08265500 2.83078800  
H -3.64359200 1.38633400 1.80897700  
O -3.89622400 0.15563600 0.10571500  
Si -5.57171300 0.13076900 0.01826300  
C -6.28957100 -0.25932600 1.75429800  
H -5.74943700 0.43135700 2.42093200  
C -7.79390500 0.02226800 1.93814200  
H -8.10232200 -0.19142000 2.97158800  
H -8.05138500 1.06691900 1.73287900  
H -8.41445200 -0.60374600 1.28520100  
C -5.94409200 -1.68743000 2.22455000  
H -4.86751600 -1.88092900 2.18225400  
H -6.27186400 -1.84323400 3.26248700  
H -6.44837500 -2.44678000 1.61299000  
C -5.90830300 -1.27014100 -1.24897400  
H -5.27956000 -2.09393600 -0.87530300  
C -7.35529700 -1.79563100 -1.30795800  
H -8.05855800 -1.02859900 -1.65290700  
H -7.43375700 -2.63933100 -2.00872600  
H -7.70742500 -2.14897700 -0.33311700  
C -5.40431200 -0.92084300 -2.66328200  
H -4.35881700 -0.59505200 -2.65668600  
H -5.48278700 -1.78856700 -3.33463500  
H -5.99575200 -0.11423300 -3.11462500  
C -6.13911400 1.84135500 -0.64762400  
H -5.44429100 2.01907600 -1.48394500  
C -7.56713200 1.90703600 -1.22363700  
H -7.77440200 2.90706900 -1.63086100  
H -7.71895300 1.18845200 -2.03639700  
H -8.33107000 1.70813500 -0.46249300  
C -5.91367600 2.98085800 0.36662000  
H -4.87399600 3.02531400 0.70692700  
H -6.15441000 3.95570600 -0.08096700  
H -6.55096900 2.86922500 1.25318100  
H -2.06055800 1.50717800 0.55105000

**Table S-23.** Geometric coordinates and thermally corrected MP2 energies for pro-*E*  $\mu$ -allyl [A(THF)<sub>3</sub>·(allyloxytriisopropylsilane)]<sup>‡</sup>.

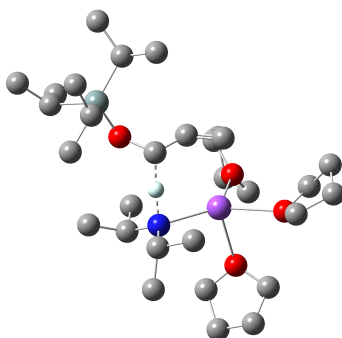

G = -1988.358474 Hartree

G<sub>MP2</sub> = -1982.051409 Hartree

| Atom | X           | Y           | Z           | Atom | X           | Y           | Z           |
|------|-------------|-------------|-------------|------|-------------|-------------|-------------|
|      |             |             |             | H    | -4.62972000 | -2.66462700 | -0.79305600 |
|      |             |             |             | H    | -2.96138700 | -2.64283400 | -1.40042000 |
| Na   | 0.00000000  | 0.00000000  | 0.00000000  | C    | -3.10341500 | -3.30254600 | 0.67641700  |
| N    | 1.46349800  | -1.93113800 | -0.13205900 | H    | -2.67935200 | -4.26240900 | 0.36864500  |
| C    | 1.42315300  | -2.72814500 | -1.36366800 | H    | -3.93305700 | -3.51016500 | 1.36097000  |
| C    | 0.53683900  | -3.98571700 | -1.28854100 | C    | -2.05041500 | -2.39576400 | 1.35480500  |
| H    | 0.53001300  | -4.51191600 | -2.25187800 | H    | -2.24437000 | -2.28132500 | 2.42950000  |
| H    | -0.49851400 | -3.71041100 | -1.04575500 | H    | -1.02626300 | -2.74595300 | 1.21489300  |
| H    | 0.88350300  | -4.69520400 | -0.53034000 | O    | -0.33149800 | 1.47722300  | 1.91415300  |
| C    | 0.93251500  | -1.84174700 | -2.51780800 | C    | -1.52419300 | 1.47838400  | 2.72204900  |
| H    | 1.00023200  | -2.36568600 | -3.47977100 | H    | -2.09728100 | 0.59024200  | 2.45015300  |
| H    | 1.52410200  | -0.92314700 | -2.59099100 | H    | -2.12322800 | 2.37431700  | 2.49462600  |
| H    | -0.12049700 | -1.56238100 | -2.36547500 | C    | -1.02523300 | 1.51100700  | 4.16451300  |
| H    | 2.43689100  | -3.07699800 | -1.64808100 | H    | -1.77971400 | 1.87787500  | 4.86724900  |
| C    | 1.83554000  | -2.69092600 | 1.07194800  | H    | -0.71740700 | 0.50760300  | 4.48100800  |
| C    | 3.18672300  | -3.43497000 | 0.98727600  | C    | 0.19425000  | 2.43963700  | 4.04286100  |
| H    | 3.39235000  | -3.97229500 | 1.92261300  | H    | 0.93155400  | 2.29207300  | 4.83722500  |
| H    | 3.99783800  | -2.72018700 | 0.81157700  | H    | -0.12486900 | 3.48798600  | 4.07240300  |
| H    | 3.19648500  | -4.17468400 | 0.17870500  | C    | 0.75629300  | 2.08158000  | 2.65709400  |
| C    | 1.86070900  | -1.73644900 | 2.27580900  | H    | 1.12096500  | 2.95529100  | 2.10641000  |
| H    | 2.07401700  | -2.27990000 | 3.20497900  | H    | 1.56532500  | 1.34722600  | 2.71761600  |
| H    | 0.89613200  | -1.22570900 | 2.39930500  | O    | -1.49850700 | 1.25429200  | -1.54391200 |
| H    | 2.64162700  | -0.97885400 | 2.14224600  | C    | -1.83269100 | 2.58014100  | -1.07684300 |
| H    | 1.06640500  | -3.45712400 | 1.28938000  | H    | -1.24202100 | 2.77491100  | -0.17806800 |
| O    | -2.13747300 | -1.10162300 | 0.71465300  | H    | -2.90022700 | 2.60577800  | -0.81313700 |
| C    | -3.37143600 | -1.03697700 | -0.01502400 | C    | -1.52753300 | 3.51966200  | -2.24311200 |
| H    | -3.23895700 | -0.28563100 | -0.79544200 | H    | -2.11467500 | 4.44227000  | -2.20446600 |
| H    | -4.19066600 | -0.72645100 | 0.65416900  | H    | -0.46491400 | 3.78621100  | -2.24719100 |
| C    | -3.58921500 | -2.46143500 | -0.52098800 | C    | -1.86284900 | 2.63397300  | -3.45318200 |

H -1.36978600 2.95459500 -4.37553100  
H -2.94462800 2.62559800 -3.63242400  
C -1.38104600 1.25613500 -2.98578700  
H -1.97908100 0.42955700 -3.38382400  
H -0.33072700 1.08433400 -3.24713200  
C 3.46652300 -0.07120600 -0.58408700  
C 2.81721500 1.19144400 -0.31039600  
C 1.92838300 1.87677800 -1.08582300  
H 1.76806000 1.62433300 -2.13283600  
H 1.43272800 2.77160900 -0.71860900  
H 2.97260400 1.55367200 0.70969500  
O 4.58947000 -0.35755500 0.27616500  
Si 6.20723300 0.00106300 0.01338400  
C 6.69989700 -0.69149800 -1.70642000  
H 5.97090500 -0.23336600 -2.39468400  
C 8.10079700 -0.30239800 -2.21811000  
H 8.26939400 -0.70147800 -3.22865700  
H 8.23862000 0.78319800 -2.27063400  
H 8.89720600 -0.70360000 -1.58003700  
C 6.49741100 -2.21787400 -1.78632800  
H 5.48489500 -2.51219800 -1.48991200  
H 6.66776600 -2.58353800 -2.80901200  
H 7.20010200 -2.75083700 -1.13285000  
C 7.02042800 -0.95474700 1.46007000  
H 6.56084100 -1.95172100 1.37483400  
C 8.54646500 -1.15174400 1.39851200  
H 9.09041000 -0.20079500 1.44049800  
H 8.89312600 -1.75670500 2.24865400  
H 8.86001900 -1.66872800 0.48478100  
C 6.59239800 -0.38458100 2.82685600  
H 5.50272300 -0.30863300 2.90318100  
H 6.94332900 -1.02584400 3.64805900  
H 7.01120000 0.61550600 2.99885600  
C 6.48900400 1.90201800 0.12111200  
H 5.84301000 2.20924600 0.95915700  
C 7.92482800 2.33778700 0.47623000  
H 7.98854100 3.43306300 0.55004000  
H 8.25932800 1.92718000 1.43474400  
H 8.65018900 2.02732200 -0.28554400  
C 5.99627900 2.65906600 -1.12941000  
H 4.94434600 2.45096500 -1.34870500  
H 6.09666200 3.74542300 -0.98965300  
H 6.58441000 2.39650600 -2.01778000  
H 2.46580800 -1.04442400 -0.32571400  
H 3.71884200 -0.23236700 -1.64075300

**Table S-24.** Geometric coordinates and thermally corrected MP2 energies for pro-Z  $\kappa$ -O [A(THF)<sub>2</sub>·(allyloxytriisopropylsilane)]<sup>‡</sup>.

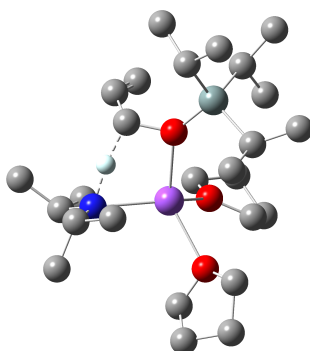

G = -1756.012449 Hartree  
 G<sub>MP2</sub> = -1750.479449 Hartree

| Atom | X           | Y           | Z           | H | 2.68691900  | 2.24615200  | 3.92065200  |
|------|-------------|-------------|-------------|---|-------------|-------------|-------------|
|      |             |             |             | H | 2.31694700  | 0.83429300  | 4.92603500  |
| Na   | 0.00000000  | 0.00000000  | 0.00000000  | C | 3.24465600  | 0.36792300  | 2.97264000  |
| N    | 0.87448200  | -2.13517900 | -0.55844800 | H | 3.11957500  | -0.70115600 | 3.17893600  |
| C    | 1.08164000  | -3.22808500 | 0.39771000  | H | 4.30722700  | 0.61192000  | 3.06381800  |
| C    | 2.55508900  | -3.47444300 | 0.77677400  | C | 2.68168900  | 0.70947100  | 1.59343700  |
| H    | 2.62940600  | -4.25271200 | 1.54726300  | H | 3.12894700  | 1.63041800  | 1.19310200  |
| H    | 3.00784300  | -2.55592700 | 1.17469000  | H | 2.79328800  | -0.09242500 | 0.85782200  |
| H    | 3.15908500  | -3.80190200 | -0.07552700 | O | 0.06173700  | 2.12957600  | -1.03265500 |
| C    | 0.27704400  | -2.94149900 | 1.67234400  | C | 0.10521300  | 3.36367700  | -0.28055600 |
| H    | 0.35523300  | -3.77020600 | 2.38734100  | H | 0.87586500  | 3.27008700  | 0.48975100  |
| H    | -0.78129600 | -2.79065600 | 1.44242100  | H | -0.86639900 | 3.50065800  | 0.21197400  |
| H    | 0.65261300  | -2.03294600 | 2.16365300  | C | 0.37575400  | 4.47530600  | -1.30016200 |
| H    | 0.70015800  | -4.19130000 | 0.00012100  | H | -0.06466800 | 5.43082400  | -1.00009400 |
| C    | 1.61956400  | -2.29133100 | -1.81652000 | H | 1.45414100  | 4.62525800  | -1.43084900 |
| C    | 1.22438000  | -3.52889300 | -2.65364100 | C | -0.24096200 | 3.89332800  | -2.58196600 |
| H    | 1.84647600  | -3.60820200 | -3.55469800 | H | 0.15827700  | 4.34019100  | -3.49735000 |
| H    | 0.17711800  | -3.46781300 | -2.97026300 | H | -1.32877700 | 4.02827600  | -2.58012200 |
| H    | 1.34941300  | -4.45775700 | -2.08627600 | C | 0.11255300  | 2.41282400  | -2.45123600 |
| C    | 1.47800600  | -1.02030300 | -2.66619600 | H | -0.58239000 | 1.73533700  | -2.95305100 |
| H    | 2.04646000  | -1.10581300 | -3.60100400 | H | 1.12733400  | 2.21076400  | -2.81948900 |
| H    | 1.86690800  | -0.14853100 | -2.12178400 | O | -2.17910200 | -0.77974200 | -0.08128600 |
| H    | 0.42969300  | -0.83110600 | -2.92955600 | C | -1.87590500 | -1.92324600 | -0.95870500 |
| H    | 2.69698200  | -2.38965200 | -1.59784300 | C | -2.21742700 | -1.73112400 | -2.35939300 |
| O    | 1.26476600  | 0.92781200  | 1.79440800  | C | -2.45545100 | -0.59690300 | -3.05794100 |
| C    | 0.98433300  | 1.09877300  | 3.20225400  | H | -2.52628000 | 0.37084100  | -2.57184200 |
| H    | 0.41744500  | 0.22826000  | 3.55386900  | H | -2.60644200 | -0.61911000 | -4.13330000 |
| H    | 0.36302500  | 1.99205500  | 3.32662600  | H | -2.16972900 | -2.66576800 | -2.92627900 |
| C    | 2.34590000  | 1.20429200  | 3.89694400  | H | -2.32318100 | -2.83174300 | -0.53807700 |

Si -3.68351700 -0.38099500 0.60023800  
C -4.74355300 -1.96894100 0.78487700  
H -4.02325300 -2.74072000 1.09970700  
C -5.83052200 -1.89106600 1.87665100  
H -6.37708700 -2.84231200 1.94155400  
H -5.41656300 -1.68641600 2.86931000  
H -6.57086500 -1.11168500 1.66094600  
C -5.36919100 -2.44293900 -0.54474100  
H -4.63322200 -2.51626900 -1.35036300  
H -5.83567300 -3.43014900 -0.41977700  
H -6.15621700 -1.75763100 -0.88239200  
C -3.15741500 0.36986800 2.29087900  
H -2.33138300 1.04865800 2.01552900  
C -4.21388400 1.22619800 3.01606300  
H -3.80586500 1.63371800 3.95219500  
H -4.54672600 2.07471600 2.40988600  
H -5.10345100 0.64365500 3.28287600  
C -2.56999700 -0.68243600 3.25148500  
H -1.77460800 -1.26759400 2.78068700  
H -2.15167500 -0.20446200 4.14930600  
H -3.33589400 -1.38721600 3.59621400  
C -4.54817300 0.93153300 -0.50222600  
H -4.54939500 0.46394200 -1.49676600  
C -6.01353100 1.26177700 -0.15321700  
H -6.42981000 1.97160000 -0.88210100  
H -6.65438700 0.37403200 -0.16619400  
H -6.11305100 1.72509100 0.83529000  
C -3.71849900 2.22693300 -0.61012500  
H -3.71187000 2.77989900 0.33860800  
H -2.67648000 2.02540700 -0.88299900  
H -4.13985300 2.90088700 -1.36987400  
H -0.44923900 -2.11564600 -0.82782600

**Table S-25.** Geometric coordinates and thermally corrected MP2 energies for pro-*E*  $\kappa$ -O [A(THF)<sub>2</sub>·(allyloxytriisopropylsilane)]<sup>‡</sup>.

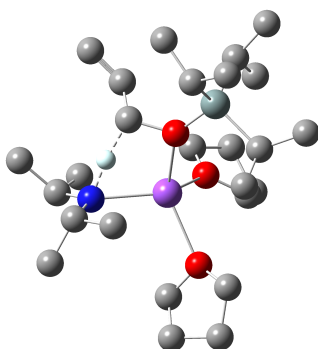

G = -1756.011312 Hartree  
 G<sub>MP2</sub> = -1750.477393 Hartree

| Atom | X           | Y           | Z           |   | X           | Y           | Z           |
|------|-------------|-------------|-------------|---|-------------|-------------|-------------|
|      |             |             |             | H | 3.11430100  | -2.74400100 | -3.22248100 |
|      |             |             |             | H | 2.67154500  | -1.60589200 | -4.50695500 |
| Na   | 0.00000000  | 0.00000000  | 0.00000000  | C | 3.44220200  | -0.66709700 | -2.65820000 |
| N    | 0.77602100  | 2.23156000  | 0.21075300  | H | 3.23102500  | 0.32064700  | -3.08341200 |
| C    | 0.90250800  | 3.13123400  | -0.94285000 | H | 4.52616900  | -0.81501700 | -2.65932900 |
| C    | 2.35338700  | 3.49068200  | -1.31325700 | C | 2.83858000  | -0.78006400 | -1.25859000 |
| H    | 2.37757300  | 4.09809000  | -2.22711500 | H | 3.34870000  | -1.54856900 | -0.66107600 |
| H    | 2.94215600  | 2.58058900  | -1.49307700 | H | 2.82954100  | 0.16214600  | -0.70288300 |
| H    | 2.85664400  | 4.06411800  | -0.52813200 | O | 0.02070100  | -1.82838700 | 1.51237200  |
| C    | 0.21455200  | 2.48964000  | -2.15696600 | C | 0.17495900  | -3.17655800 | 1.02084800  |
| H    | 0.21181400  | 3.17088500  | -3.01715400 | H | 0.84924200  | -3.13771100 | 0.16175300  |
| H    | -0.82242800 | 2.22507500  | -1.92938500 | H | -0.80344800 | -3.55333900 | 0.68963900  |
| H    | 0.74347500  | 1.57282600  | -2.45424500 | C | 0.70246100  | -3.98333100 | 2.20607500  |
| H    | 0.37991600  | 4.09225400  | -0.76055400 | H | 0.48326900  | -5.05177400 | 2.11916600  |
| C    | 1.44822100  | 2.70651900  | 1.42938100  | H | 1.78842100  | -3.86207500 | 2.29854800  |
| C    | 0.89768400  | 4.03189800  | 2.00106400  | C | -0.01907800 | -3.30723400 | 3.38259200  |
| H    | 1.47580000  | 4.34702000  | 2.87986100  | H | 0.47915400  | -3.46065600 | 4.34427500  |
| H    | -0.15009500 | 3.91943300  | 2.30467100  | H | -1.04353800 | -3.68757100 | 3.46738700  |
| H    | 0.95365600  | 4.84242500  | 1.26565500  | C | -0.02575600 | -1.83307300 | 2.96047100  |
| C    | 1.37588300  | 1.61183800  | 2.50370600  | H | -0.92309600 | -1.29599700 | 3.28242900  |
| H    | 1.88979200  | 1.92154100  | 3.42223100  | H | 0.85427000  | -1.29638600 | 3.33231400  |
| H    | 1.84981200  | 0.68682800  | 2.14791400  | O | -2.19388300 | 0.67042500  | -0.16534600 |
| H    | 0.33338100  | 1.39411000  | 2.76593200  | C | -1.96244700 | 1.94027000  | 0.57554500  |
| H    | 2.51964000  | 2.86729900  | 1.22067300  | C | -2.43635000 | 1.89158400  | 1.95487900  |
| O    | 1.46155100  | -1.18541400 | -1.45923900 | C | -2.89067000 | 2.91796300  | 2.70834300  |
| C    | 1.27603700  | -1.65545800 | -2.81438500 | H | -3.05880300 | 3.90685900  | 2.28575500  |
| H    | 0.65325800  | -0.93134700 | -3.35340900 | H | -3.07384000 | 2.80746100  | 3.77345800  |
| H    | 0.74546000  | -2.61283900 | -2.77923500 | H | -2.30422300 | 0.92392800  | 2.45090900  |
| C    | 2.67772200  | -1.75853100 | -3.42371800 | H | -2.40043800 | 2.76500900  | -0.00053100 |

Si -3.70627800 0.09489600 -0.66598000  
C -4.73968800 1.54519000 -1.38533400  
H -3.98944600 2.16450000 -1.90324100  
C -5.79055200 1.12829800 -2.43566600  
H -6.31170400 2.01286100 -2.82782200  
H -5.35007900 0.60557900 -3.29091100  
H -6.55781700 0.47142900 -2.00705100  
C -5.40583900 2.43447200 -0.31335100  
H -4.70904200 2.75956300 0.46374700  
H -5.83988200 3.33121200 -0.77749800  
H -6.22676400 1.90684700 0.18798700  
C -3.18445400 -1.18956900 -1.99681900  
H -2.39421100 -1.76699100 -1.48644500  
C -4.26306600 -2.19877600 -2.43427500  
H -3.85513500 -2.91331800 -3.16371500  
H -4.65100100 -2.78044800 -1.59163200  
H -5.11660800 -1.70543300 -2.91312300  
C -2.53017000 -0.52870800 -3.22683500  
H -1.72547300 0.15794300 -2.94298200  
H -2.10703200 -1.28667800 -3.90202500  
H -3.25751900 0.04717700 -3.81140600  
C -4.56866500 -0.73875000 0.83083200  
H -4.54825500 0.04579900 1.60223400  
C -6.04261900 -1.14188100 0.62855500  
H -6.46977500 -1.52942000 1.56426800  
H -6.66441500 -0.29733600 0.31401300  
H -6.15513500 -1.93128700 -0.12433600  
C -3.75327800 -1.93119900 1.36905000  
H -3.78293700 -2.78133100 0.67433100  
H -2.70057700 -1.67024900 1.52500500  
H -4.15956700 -2.28696000 2.32678900  
H -0.51369500 2.16019200 0.46404600



**Table S-26.** Geometric coordinates and thermally corrected MP2 energies for pro-*E*  $\kappa$ -O [A(THF)<sub>3</sub>·(allyloxytriisopropylsilane)]<sup>‡</sup>. The pro-*Z* isomer does not converge without THF extrusion.

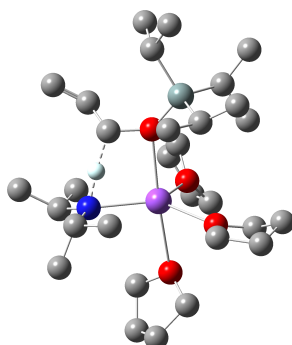

G = -1988.34947 Hartree  
G<sub>MP2</sub> = -1982.049537 Hartree

| Atom | X           | Y           | Z           |   | X           | Y           | Z           |
|------|-------------|-------------|-------------|---|-------------|-------------|-------------|
|      |             |             |             | H | 5.14295200  | -2.12124800 | -1.15767500 |
|      |             |             |             | H | 4.09251800  | -0.90900700 | -1.91878200 |
|      |             |             |             | C | 4.81376000  | -0.28682700 | 0.03636700  |
| Na   | 0.00000000  | 0.00000000  | 0.00000000  | H | 5.42802500  | 0.49783600  | -0.41512300 |
| N    | 0.60164300  | 1.96298100  | -1.26448300 | H | 5.38714700  | -0.73719400 | 0.85572000  |
| C    | 0.75387600  | 1.78999700  | -2.71469700 | C | 3.46870000  | 0.24694100  | 0.54136400  |
| C    | 2.20956600  | 1.83613200  | -3.21457900 | H | 3.50185200  | 0.57558700  | 1.58600900  |
| H    | 2.25381600  | 1.62528600  | -4.29093600 | H | 3.09323000  | 1.06895500  | -0.07526900 |
| H    | 2.81369700  | 1.08026400  | -2.69437700 | O | -0.02665900 | -0.02363700 | 2.38561100  |
| H    | 2.67987000  | 2.81127000  | -3.05309300 | C | 0.83629000  | -0.71239500 | 3.30119200  |
| C    | 0.13508100  | 0.44658400  | -3.12343700 | H | 1.65897600  | -1.12275000 | 2.71420500  |
| H    | 0.10098000  | 0.33683000  | -4.21493000 | H | 0.27836900  | -1.53571700 | 3.77429900  |
| H    | -0.88748100 | 0.34970700  | -2.74493200 | C | 1.25384800  | 0.33959000  | 4.34980100  |
| H    | 0.73267300  | -0.38417500 | -2.72254600 | H | 1.29936800  | -0.09568700 | 5.35272400  |
| H    | 0.20382700  | 2.57393600  | -3.27328400 | H | 2.24345500  | 0.74762000  | 4.12328600  |
| C    | 1.26298300  | 3.16452900  | -0.73173600 | C | 0.16270800  | 1.44034400  | 4.22747400  |
| C    | 0.83005700  | 4.50074400  | -1.37588100 | H | 0.59848200  | 2.37719000  | 3.86945000  |
| H    | 1.38382600  | 5.33838500  | -0.93118800 | H | -0.33682700 | 1.64629200  | 5.17885500  |
| H    | -0.24082100 | 4.67830300  | -1.22225500 | C | -0.81472800 | 0.87188300  | 3.18599800  |
| H    | 1.02670000  | 4.51724500  | -2.45375700 | H | -1.62651500 | 0.30670100  | 3.66716100  |
| C    | 1.04599900  | 3.23779700  | 0.78720600  | H | -1.25190300 | 1.61167200  | 2.51477100  |
| H    | 1.60714700  | 4.07487000  | 1.22170400  | O | -0.20014400 | -2.42384600 | -0.65109500 |
| H    | 1.37647500  | 2.31436200  | 1.27770400  | C | -0.16490100 | -3.46383100 | 0.34170700  |
| H    | -0.01318000 | 3.39074200  | 1.01938300  | H | -0.56011400 | -3.04756700 | 1.27039900  |
| H    | 2.35466600  | 3.08185100  | -0.88793400 | H | 0.87405000  | -3.78509800 | 0.51113600  |
| O    | 2.53022500  | -0.85141900 | 0.43673400  | C | -1.00086300 | -4.59656300 | -0.24720600 |
| C    | 3.14160200  | -1.94637500 | -0.26779400 | H | -0.78553900 | -5.56678200 | 0.21082800  |
| H    | 2.39845200  | -2.36024000 | -0.95354900 | H | -2.06732900 | -4.38232700 | -0.11716300 |
| H    | 3.42733300  | -2.72848200 | 0.45258100  | C | -0.60772200 | -4.52749900 | -1.73281600 |
| C    | 4.37415200  | -1.36681200 | -0.96361200 |   |             |             |             |

H -1.38031600 -4.92137000 -2.39916200  
H 0.30861600 -5.10200300 -1.90963800  
C -0.35715600 -3.02371700 -1.96011100  
H 0.54581500 -2.83736800 -2.55289300  
H -1.19847600 -2.52640300 -2.45043900  
C -2.14335900 2.05074900 -0.82906700  
C -2.55723400 3.24688600 -0.10535900  
C -2.93586300 4.43759400 -0.62037000  
H -3.09485000 4.57434000 -1.68866100  
H -3.07134500 5.31431300 0.00678300  
H -2.43453900 3.18525200 0.98129100  
H -2.58419600 1.99750100 -1.83431400  
O -2.45321300 0.79266800 -0.09259800  
Si -3.98416500 0.06033000 -0.06852900  
C -5.38128400 1.34303700 -0.38364100  
H -4.97196700 2.00791900 -1.15727900  
C -6.69271300 0.74765700 -0.93757800  
H -7.42284800 1.54699200 -1.12685600  
H -6.54713400 0.21314900 -1.88187600  
H -7.16213700 0.04933000 -0.23384900  
C -5.68629100 2.23172400 0.84000000  
H -4.79214900 2.74025900 1.20810400  
H -6.41247900 3.01140000 0.57183200  
H -6.12109000 1.65752900 1.66716400  
C -4.16463700 -0.70707700 1.68633800  
H -3.97161600 0.14850300 2.35318200  
C -5.56885800 -1.24169800 2.03518500  
H -5.83792800 -2.11404500 1.42883600  
H -5.60877200 -1.55951500 3.08696000  
H -6.35198500 -0.49102900 1.89307300  
C -3.10471400 -1.77709200 2.00591900  
H -2.08777000 -1.39238200 1.88431400  
H -3.20549800 -2.13051800 3.04329900  
H -3.21628400 -2.65769300 1.35985600  
C -3.91303200 -1.30311500 -1.42539200  
H -2.93133400 -1.76331700 -1.23117200  
C -4.96356600 -2.42759000 -1.34542300  
H -4.80533900 -3.16445600 -2.14688600  
H -4.92181100 -2.96967400 -0.39452400  
H -5.98491200 -2.04771400 -1.46100900  
C -3.86262200 -0.72387100 -2.85419600  
H -3.09104600 0.04448400 -2.96364100  
H -3.65098100 -1.51287900 -3.59108200  
H -4.81827000 -0.27011800 -3.14218600  
H -0.68028000 2.06834300 -1.04886700

### III. Full reference (Gaussian):

Gaussian 09, Revision A.02, M. J. Frisch, G. W. Trucks, H. B. Schlegel, G. E. Scuseria, M. A. Robb, J. R. Cheeseman, G. Scalmani, V. Barone, G. A. Petersson, H. Nakatsuji, X. Li, M. Caricato, A. Marenich, J. Bloino, B. G. Janesko, R. Gomperts, B. Mennucci, H. P. Hratchian, J. V. Ortiz, A. F. Izmaylov, J. L. Sonnenberg, D. Williams-Young, F. Ding, F. Lipparini, F. Egidi, J. Goings, B. Peng, A. Petrone, T. Henderson, D. Ranasinghe, V. G. Zakrzewski, J. Gao, N. Rega, G. Zheng, W. Liang, M. Hada, M. Ehara, K. Toyota, R. Fukuda, J. Hasegawa, M. Ishida, T. Nakajima, Y. Honda, O. Kitao, H. Nakai, T. Vreven, K. Throssell, J. A. Montgomery, Jr., J. E. Peralta, F. Ogliaro, M. Bearpark, J. J. Heyd, E. Brothers, K. N. Kudin, V. N. Staroverov, T. Keith, R. Kobayashi, J. Normand, K. Raghavachari, A. Rendell, J. C. Burant, S. S. Iyengar, J. Tomasi, M. Cossi, J. M. Millam, M. Klene, C. Adamo, R. Cammi, J. W. Ochterski, R. L. Martin, K. Morokuma, O. Farkas, J. B. Foresman, and D. J. Fox, Gaussian, Inc., Wallingford CT, 2016.
